# Supplementary material for: Multi-Omics Sequencing Provides Insights Into Age-Dependent Susceptibility of Grass Carp (Ctenopharyngodon idellus) to Reovirus
Source: Front Immunol. 2021 Jun 17;12:694965. doi: 10.3389/fimmu.2021.694965 (PMC8247658; doi:10.3389/fimmu.2021.694965)
Supplement: Supplementary file 12 [file Table_8.xlsx]

## Sheet: S1-1 vs S1-0
Index	Compounds	Class	S1-0a	S1-0b	S1-0c	S1-1a	S1-1b	S1-1c	VIP	Fold_Change	Log2FC	Type
Cmhp057	CAR C12:1-OH	Carnitine	377260	345590	321240	9	9	9	1.29321	2.58598e-05	-15.2389	down
MEDN244	Orotic Acid	CoOthersEnzyme Factor & vitamin	2126400	1675700	1337300	91513	59949	70965	1.2856	0.0432788	-4.5302	down
MEDN533	Xanthosine	Nucleotide metabolomics	1299900	1050200	1003800	111430	70459	47285	1.27185	0.0683306	-3.87132	down
MEDP251	Trigonelline	CoOthersEnzyme Factor & vitamin	137560	116660	97859	10538	10436	7533.8	1.28694	0.0809699	-3.62647	down
Cmzn020	LysoPE 20:2	Lipids_Glycerophospholipids	753130	573270	563660	67249	36943	49484	1.27725	0.0813075	-3.62047	down
Cmzp026	LysoPC 20:1 (2n isomer)	Lipids_Glycerophospholipids	4304900	3234500	3545500	328240	318470	261330	1.28896	0.0819168	-3.6097	down
Cmzp025	LysoPC 20:1	Lipids_Glycerophospholipids	4023800	3340400	3658300	317840	305190	286580	1.29166	0.082523	-3.59906	down
MEDN553	2-Methylbenzoic acid	Benzene and substituted derivatives	1052800	911360	1097100	101380	77576	77540	1.28734	0.0837877	-3.57712	down
MEDN579	N-lactoyl-phenylalanine	Amino Acid metabolomics	69090	66415	61057	8483.1	4062.9	6445.1	1.2704	0.0966163	-3.37159	down
Cmzn008	LysoPE 18:2 (2n isomer)	Lipids_Glycerophospholipids	7422200	6439900	6450200	707610	669130	671060	1.29227	0.100816	-3.31021	down
MEDN163	Hypoxanthine	Nucleotide metabolomics	6796200	7042200	7666500	878350	612310	725810	1.2853	0.103068	-3.27833	down
MEDN140	2,6-Dihydroxypurine	Nucleotide metabolomics	4820200	4861700	4516100	604120	576450	304040	1.27197	0.104565	-3.25753	down
Whmp0305	Oxypurinol	Nucleotide metabolomics	6248700	5511700	5421400	840390	553130	581230	1.28254	0.114933	-3.12114	down
Cmzp024	LysoPC 20:2 (2n isomer2)	Lipids_Glycerophospholipids	18315000	14993000	15335000	2151400	1978700	1745400	1.2896	0.120788	-3.04945	down
MEDN528	(3-Methoxy-4-hydroxyphenyl)ethylene glycol sulfate	Organic Acid And Its Derivatives	33021	31330	28552	3640.2	3583.8	4711	1.28723	0.128467	-2.96053	down
MEDP618	2-Methylbutyroylcarnitine (CAR C5:0)	Carnitine	833200	670620	714810	112780	103320	111890	1.28957	0.147834	-2.75795	down
MEDP089	N-Acetylhistamine	Amines	156840	95146	105820	16349	24642	14326	1.26181	0.154601	-2.69338	down
MEDN017	L-Pyroglutamic Acid	Amino Acid metabolomics	45554	67481	92665	12336	11749	8522.6	1.24778	0.15852	-2.65726	down
MEDP577	Isobutyryl carnitine (CAR C4:0)	Carnitine	1227500	1030300	1034700	265330	102070	167050	1.23662	0.162323	-2.62306	down
Cmzp023	LysoPC 20:2	Lipids_Glycerophospholipids	8489500	7249000	6863500	1403300	1253500	1087000	1.28722	0.16564	-2.59388	down
Cmzn006	LysoPE 18:3 (2n isomer)	Lipids_Glycerophospholipids	1124300	905720	923240	229030	136330	164980	1.26916	0.179578	-2.47732	down
MEDN057	N-Acetyl-L-Tyrosine	Amino Acid metabolomics	55642	47836	39258	16011	6462.7	3191.4	1.16098	0.179808	-2.47547	down
MEDP601	Spermidine	Amines	4531200	2734000	2474600	996120	229510	629820	1.14051	0.190502	-2.39212	down
MEDN325	L-Lactic Acid	Organic Acid And Its Derivatives	448020	322730	328420	74899	67581	68175	1.28266	0.191649	-2.38346	down
Cmzn010	LysoPE 18:1 (2n isomer)	Lipids_Glycerophospholipids	1310100	1129300	1099500	309960	176920	223430	1.2644	0.200715	-2.31678	down
MEDP086	Urea	Amino Acid metabolomics	199430	227800	213950	43679	46806	40708	1.2906	0.204612	-2.28904	down
MEDP051	L-Cystathionine	Amino Acid metabolomics	6460800	6894200	7007700	1591400	1264700	1381000	1.2864	0.208081	-2.26478	down
MEDP664	L- tyrosine methyl ester	Amino Acid metabolomics	293030	266440	267240	73280	47790	54429	1.27462	0.212286	-2.23592	down
Cmzp010	LysoPC 18:2	Lipids_Glycerophospholipids	37713000	35685000	36314000	8633500	7906300	7214400	1.29021	0.216514	-2.20747	down
Cmzp011	LysoPC 18:2 (2n isomer)	Lipids_Glycerophospholipids	39826000	34672000	34852000	9032500	7777800	7337300	1.2872	0.220829	-2.179	down
MEDP697	2,6-Di-tert-butyl-4-methylphenol	Benzene and substituted derivatives	949340	301340	717590	167670	93463	189360	1.11216	0.228878	-2.12735	down
Cmhp020	CAR C6-OH(3)	Carnitine	86948	79438	87080	25713	15383	20061	1.26263	0.241283	-2.0512	down
MEDP178	Uracil	Nucleotide metabolomics	764380	457070	649280	160180	142690	148750	1.26084	0.241414	-2.05042	down
MEDN171	Uridine	Nucleotide metabolomics	1059200	976020	1158500	318260	216820	242310	1.27091	0.243412	-2.03853	down
MEDN455	Guanine	Nucleotide metabolomics	45894	28708	33302	7456.8	7193.1	11859	1.23678	0.245671	-2.0252	down
Wmjp1814	2',6'-Dihydroxy-4'-methoxyacetophenone	Benzene and substituted derivatives	774440	260570	613920	141680	91943	175740	1.11401	0.24826	-2.01008	down
MEDN283	2-Hydroxybutanoic Acid	Organic Acid And Its Derivatives	586750	518480	522440	187650	109240	116310	1.25351	0.25386	-1.9779	down
Cmzp014	LysoPC 18:0	Lipids_Glycerophospholipids	98834000	92268000	92648000	27715000	21552000	23812000	1.28432	0.257547	-1.95709	down
MEDN368	Lysope 14:0	Lipids_Glycerophospholipids	976950	882150	866920	268400	202560	244480	1.28069	0.262449	-1.92989	down
Cmzp015	LysoPC 18:0 (2n isomer)	Lipids_Glycerophospholipids	97988000	91891000	89009000	27803000	21439000	24201000	1.2835	0.263342	-1.92499	down
Cmzp012	LysoPC 18:1	Lipids_Glycerophospholipids	36361000	36666000	35460000	8429800	11897000	9776700	1.28001	0.277485	-1.84952	down
MEDP537	PAF C-16	Lipids_others	104830000	99699000	101380000	33589000	25436000	27723000	1.28098	0.283575	-1.8182	down
Cmzp013	LysoPC 18:1 (2n isomer)	Lipids_Glycerophospholipids	39251000	32443000	35302000	8205300	12167000	9997200	1.27034	0.283838	-1.81686	down
Wmjp0774	ALANYL-dl-LEUCINE	Amino Acid metabolomics	150670	136930	118310	42001	35027	39980	1.28156	0.288261	-1.79455	down
MEDP375	Deoxyadenosine	Nucleotide metabolomics	856100	762350	803630	284050	201840	260870	1.26985	0.308314	-1.69753	down
MEDP160	Adenosine	Nucleotide metabolomics	48838000	39602000	41050000	16628000	10189000	13312000	1.24902	0.3099	-1.69012	down
MEDN400	Α-Linolenic Acid(C18:3N3)	Lipids_Fatty Acids	232500	216370	203420	79521	52052	72047	1.25944	0.312162	-1.67963	down
MEDN056	N-Acetyl-L-Leucine	Amino Acid metabolomics	183190	143230	132170	56470	37493	50307	1.24868	0.314595	-1.66843	down
MEDP149	2'-Deoxyadenosine-5'-Monophosphate	Nucleotide metabolomics	1847400	1164300	1371300	597950	356520	445870	1.21806	0.319493	-1.64614	down
MEDP494	Lysopc 15:0	Lipids_Glycerophospholipids	12539000	10627000	11026000	4306700	3189200	3436000	1.27205	0.319721	-1.64511	down
MEDP056	L-Homocystine	Amino Acid metabolomics	74435	48310	88826	25232	18656	23908	1.20687	0.320441	-1.64187	down
MEDN434	Β-Pseudouridine	Nucleotide metabolomics	52838	110310	87413	28913	14653	37331	1.09503	0.322863	-1.631	down
Cmhp003	CAR C3:0	Carnitine	2269800	2004600	1952100	846460	529910	662310	1.25249	0.32742	-1.61079	down
MEDP151	2-Hydroxy-6-Aminopurine	Nucleotide metabolomics	565030	383660	485270	211220	118670	144370	1.21274	0.330734	-1.59625	down
MEDP244	All-Trans-13,14-Dihydroretinol	CoOthersEnzyme Factor & vitamin	187170	184150	181370	65767	55385	63160	1.28624	0.333482	-1.58432	down
MEDN378	γ-Linolenic Acid(C18:3N6)	Lipids_Fatty Acids	189220	173170	163670	70167	47145	66289	1.25389	0.349012	-1.51865	down
MEDP082	S-Sulfo-L-Cysteine	Amino Acid metabolomics	54381	55191	58178	13074	18804	27006	1.20403	0.351022	-1.51037	down
Wmjp0831	?Valylleucine	Amino Acid metabolomics	411820	354050	364980	159440	148650	118640	1.26901	0.377353	-1.40601	down
MEDP461	2-Methylguanosine	Nucleotide metabolomics	479430	363740	419120	185320	124470	170030	1.23616	0.380119	-1.39548	down
Wmjp0785	Threoninyl-Phenylalanine	Amino Acid metabolomics	265920	217880	142850	101620	49166	89186	1.11437	0.382944	-1.38479	down
Wmjp0958	L-Valyl-L-phenylalanine	Amino Acid metabolomics	174360	206790	225670	94777	74854	62814	1.2389	0.383054	-1.38438	down
Cmmn9011	Pinolenic Acid	Lipids_Fatty Acids	316180	300260	314690	143900	91459	123180	1.24268	0.385058	-1.37685	down
MEDN059	N-Glycyl-L-Leucine	Amino Acid metabolomics	82173	74849	60026	35669	27623	20960	1.21706	0.388172	-1.36523	down
MEDP336	Lysopc 14:0	Lipids_Glycerophospholipids	31807000	26347000	26482000	13127000	9201000	10645000	1.25293	0.389586	-1.35999	down
Cmzp002	LysoPC 14:0 (2n isomer)	Lipids_Glycerophospholipids	39973000	34528000	34768000	17511000	12474000	13419000	1.25593	0.397222	-1.33198	down
Cmhp014	CAR C5-OH(3)	Carnitine	405040	344100	271690	143450	142390	131710	1.25498	0.40903	-1.28972	down
MEDN156	Cytidine-5-Monophosphate	Nucleotide metabolomics	324910	247980	199780	114780	103660	101490	1.23175	0.414058	-1.2721	down
MEDP212	N-Acetyl-5-Hydroxytryptamine	Tryptamine, Choline, pigment	81330	53383	58589	30377	20350	29626	1.19253	0.415686	-1.26643	down
MEDP298	6-Aminocaproic Acid	Organic Acid And Its Derivatives	15986000	12778000	11937000	7660400	4055900	5338200	1.17594	0.419019	-1.25491	down
MEDP150	2'-Deoxyinosine	Nucleotide metabolomics	32070	30002	33180	9626.4	8337.1	22141	1.0838	0.421036	-1.24799	down
MEDP437	Ergothioneine	Organic Acid And Its Derivatives	3490400	2993100	2644400	1474400	1147800	1225800	1.25571	0.421565	-1.24617	down
MEDP177	Thymine	Nucleotide metabolomics	184560	157780	166930	103290	57708	56129	1.17476	0.426349	-1.22989	down
MEDP176	Thymidine	Nucleotide metabolomics	80406	51924	61162	39256	25026	18301	1.12151	0.426803	-1.22836	down
MEDP538	LTD4 [5S-hydroxy-6R-(S-cysteinylglycinyl)-7E,9E,11Z,14Z-eicosatetraenoic acid]	Lipids_Fatty Acids	23900000	22004000	22244000	11333000	8786500	9764400	1.26949	0.438515	-1.1893	down
MEDN490	Fumaric Acid	Amino Acid metabolomics	229290	211400	174570	111540	88405	71662	1.22009	0.441451	-1.17968	down
MEDN200	L-Malic Acid	Amino Acid metabolomics	5611000	2971400	3237600	1648800	1808700	1771700	1.15288	0.442403	-1.17657	down
Cmhp013	CAR C4:DC	Carnitine	307230	239120	213750	142880	97815	97731	1.20102	0.445239	-1.16735	down
MEDN161	Guanosine 3',5'-Cyclic Monophosphate	Nucleotide metabolomics	233920	173360	154030	120020	57652	73124	1.11213	0.446805	-1.16228	down
Cmhp127	CAR C22:2-OH(3)	Carnitine	102290	89468	82210	46504	34384	42191	1.24804	0.449246	-1.15442	down
MEDP052	L-Cysteine	Amino Acid metabolomics	73439	72207	77435	31524	33510	36094	1.28322	0.453324	-1.14139	down
MEDP316	Homovanillic Acid	Organic Acid And Its Derivatives	6297700	4668900	5582000	3475000	2016100	2011700	1.15777	0.45338	-1.14121	down
MEDP155	5-Methylcytosine	Nucleotide metabolomics	44865	46417	53854	37007	11393	17506	1.01674	0.454098	-1.13892	down
MEDN336	N'-Formylkynurenine	Organic Acid And Its Derivatives	15548	13006	12057	8316.6	5801.5	4327.6	1.1625	0.454205	-1.13859	down
MEDP853	Choline chloride	Tryptamine, Choline, pigment	26039000	23388000	21680000	11943000	9723900	10783000	1.26839	0.456353	-1.13178	down
Cmhp123	CAR C22:1	Carnitine	207690	215320	206650	102180	86769	100620	1.27948	0.459882	-1.12067	down
MEDN431	2-(Dimethylamino)Guanosine	Nucleotide metabolomics	28272	13610	15188	9234	7583.7	9523.1	1.08228	0.461552	-1.11543	down
MEDN662	Gamma-Glu-Leu	Organic Acid And Its Derivatives	1103400	925490	908210	561590	332800	464640	1.19059	0.462712	-1.11182	down
MEDP883	2,4-Dihydroxypteridine	Pteridines and derivatives	51672	30237	34958	26615	12320	15199	1.05681	0.46321	-1.11026	down
MEDP545	2-Pyrrolidinone	Benzene and substituted derivatives	1388500	1129900	1172400	708790	458230	543010	1.21382	0.463322	-1.10991	down
Cmzp004	LysoPC 16:1 (2n isomer)	Lipids_Glycerophospholipids	92535000	75494000	74799000	46377000	32184000	34274000	1.22407	0.46467	-1.10572	down
MEDN004	L-Cystine	Amino Acid metabolomics	28756	30998	28841	9980.3	13923	17347	1.1955	0.465605	-1.10282	down
MEDP101	P-Coumaric Acid	Benzene and substituted derivatives	347550	274570	291250	164080	103830	157730	1.18928	0.46601	-1.10157	down
MEDN143	3'-Aenylic Acid	Nucleotide metabolomics	11610000	9899600	9356600	6614400	3662000	4348200	1.1636	0.473806	-1.07763	down
MEDP456	Piperidine	Benzene and substituted derivatives	1399300	991810	948600	759060	307540	521930	1.04187	0.475649	-1.07203	down
MWS0402-N	trans-4-Hydroxy-D-proline	Amino Acid metabolomics	196880	200400	182660	128420	78669	72589	1.16916	0.482253	-1.05214	down
Cmzn003	LysoPE 16:0	Lipids_Glycerophospholipids	71727000	68931000	71363000	36871000	30694000	34888000	1.27594	0.483221	-1.04924	down
MEDP606	2-(3,4-dimethoxyphenyl)ethanamine	Amines	16446000	13622000	15017000	9217800	6464300	6116700	1.20925	0.483504	-1.0484	down
MEDP125	Choline	Tryptamine, Choline, pigment	379820	336390	353320	206470	141750	169610	1.23214	0.484166	-1.04643	down
MEDP583	Asp-Phe methyl ester	Others	1871100	1483200	1395500	1111000	551770	644860	1.10619	0.485837	-1.04145	down
MEDP586	N-Acetylphenylalanine	Amino Acid metabolomics	424510	403500	288180	198490	170510	175450	1.22068	0.487775	-1.03571	down
MEDP507	2-Hydroxycinnamic acid	Benzene and substituted derivatives	1446800	1215600	1234000	731810	553670	629720	1.24628	0.491531	-1.02465	down
MEDN593	D-(+)-Malic acid	Amino Acid metabolomics	2445300	2086700	1830700	986460	1153300	992140	1.25283	0.492228	-1.0226	down
Cmzn037	PI 18:1	Lipids_Glycerophospholipids	294820	237680	256750	177750	84915	126400	1.10604	0.492955	-1.02047	down
MEDN351	12-Hete	Lipids_Fatty Acids	2590600	2241300	2133700	1443400	833760	1167700	1.16841	0.494553	-1.0158	down
MEDN496	N-Acetylmethionine	Amino Acid metabolomics	23856	22098	17335	15530	5507.2	10319	1.00093	0.495445	-1.0132	down
MEDN657	D-Xylulose 5-phosphate	Carbohydrate metabolomics	14415000	14328000	13071000	8309900	5896200	6565600	1.23854	0.496764	-1.00937	down
MEDP014	L-Aspartic Acid	Amino Acid metabolomics	12967000	11729000	12267000	28368000	23848000	22042000	1.25967	2.00898	1.00646	up
Cmzn024	LysoPE 22:5(2n isomer2)	Lipids_Glycerophospholipids	3483500	3191400	2973200	7960000	4845200	6611700	1.18318	2.01251	1.009	up
Cmzn025	LysoPE 22:5(2n isomer3)	Lipids_Glycerophospholipids	3456200	3127300	2790000	7961600	4772100	6387200	1.17475	2.03989	1.02849	up
MEDN138	1-Methylhistidine	Amino Acid metabolomics	21013	14894	17999	50497	25368	35041	1.09326	2.0574	1.04082	up
Cmzn023	LysoPE 22:5(2n isomer1)	Lipids_Glycerophospholipids	3370200	3094400	2911600	7984700	4884400	6428900	1.19354	2.05819	1.04138	up
MEDN317	Hippuric Acid	Amino Acid metabolomics	36919	32598	29431	81849	52891	68931	1.20002	2.05836	1.0415	up
MEDP877	Cytidine 5'-Diphosphocholine	Nucleotide metabolomics	194850	146660	120390	420790	252500	282730	1.11534	2.06976	1.04946	up
MEDN499	Argininosuccinic acid	Organic Acid And Its Derivatives	1378300	1254500	1290700	3470100	2294400	2723000	1.23234	2.16325	1.1132	up
MEDP783	10-UNDECENOIC ACID	Lipids_Fatty Acids	764470	685030	738890	1892100	1531200	1524200	1.27073	2.26079	1.17683	up
MEDN771	15-oxoETE [15-oxo-5Z,8Z,11Z,13E-eicosatetraenoic acid]	Oxidized lipid	197270	174720	163990	468940	315530	443860	1.22929	2.29175	1.19645	up
MEDP276	Indole-3-Carboxaldehyde	Indole And Its Derivatives	22733	18447	8564	47038	32016	35711	1.04471	2.30711	1.20609	up
MEDN669	5-oxoETE [5-oxo-6E,8Z,11Z,14Z-eicosatetraenoic acid]	Oxidized lipid	42562	32275	35619	115560	67066	92421	1.20522	2.4901	1.31621	up
MEDP060	Methionine Sulfoxide	Amino Acid metabolomics	179190	154810	188320	464850	415750	462970	1.2828	2.57231	1.36307	up
MEDP845	1-Phenylethanol	Benzene and substituted derivatives	2946300	2733000	2733300	7636800	7012400	7089700	1.28887	2.58409	1.36966	up
MEDP746	gamma-Terpinene	Others	10761000	11985000	11834000	38990000	25300000	26135000	1.23948	2.61495	1.38678	up
MEDP035	5-Hydroxy-L-Tryptophan	Amino Acid metabolomics	16744	19269	15682	57305	34861	44679	1.23042	2.64716	1.40445	up
MEDN027	3-N-Methyl-L-Histidine	Amino Acid metabolomics	36846	23415	23935	92465	53649	80891	1.18183	2.69615	1.4309	up
Cmzn027	LysoPE 22:4(2n isomer1)	Lipids_Glycerophospholipids	9531.8	11683	5349.3	27861	18865	27173	1.14898	2.78191	1.47608	up
MEDN321	Kinic Acid	Organic Acid And Its Derivatives	92002	94624	70493	333690	208200	179800	1.18981	2.80683	1.48894	up
Cmzn007	LysoPE 18:2	Lipids_Glycerophospholipids	29335	31149	27185	109260	67550	86845	1.25073	3.00739	1.58851	up
Cmzn002	LysoPE 16:1 (2n isomer)	Lipids_Glycerophospholipids	139590	124750	135520	505720	316240	415810	1.25716	3.09551	1.63018	up
Cmzn001	LysoPE 16:1	Lipids_Glycerophospholipids	142100	129150	125280	513080	328310	396280	1.25841	3.12125	1.64212	up
MEDN198	Citric Acid	Amino Acid metabolomics	1099500	667620	588390	3845800	2021000	2771900	1.19519	3.66744	1.87477	up
MEDN373	LipoxinA4 [5S,6R,15S-trihydroxy-7E,9E,11Z,13E-eicosatetraenoic acid]	Oxidized lipid	16931	11517	12465	80339	46486	62092	1.25274	4.61753	2.20712	up
MEDP043	Glutathione Oxidized	Amino Acid metabolomics	551700	390200	401970	2640500	1549200	2420800	1.25529	4.919	2.29837	up
MEDN413	Ethylmalonate	Organic Acid And Its Derivatives	8095.5	7175.3	6966.2	108780	58862	101040	1.27812	12.0827	3.59487	up
MEDN537	ADP-ribose	Nucleotide metabolomics	446910	491360	508790	8270600	6319300	6670100	1.29109	14.6919	3.87694	up
MEDN285	2-Methylsuccinic Acid	Organic Acid And Its Derivatives	1172700	779700	787970	18035000	11090000	13919000	1.28023	15.7074	3.97337	up
MEDN314	Glutaric Acid	Organic Acid And Its Derivatives	1167500	816110	876920	19627000	11574000	15205000	1.28197	16.2229	4.01996	up
Cmzn009	LysoPE 18:1	Lipids_Glycerophospholipids	15689	4999.5	3712.9	162720	111890	130120	1.23379	16.5863	4.05192	up

## Sheet: S1-3 vs S1-0
Index	Compounds	Class	S1-0a	S1-0b	S1-0c	S1-3a	S1-3b	S1-3c	VIP	Fold_Change	Log2FC	Type
Cmhp003	CAR C3:0	Carnitine	2269800	2004600	1952100	901060	683140	658220	1.21683	0.360141	-1.47336	down
Cmhp013	CAR C4:DC	Carnitine	307230	239120	213750	152650	121270	65375	1.04685	0.446382	-1.16365	down
Cmhp014	CAR C5-OH(3)	Carnitine	405040	344100	271690	171490	133560	100860	1.14742	0.397627	-1.33051	down
Cmhp023	CAR C8:1	Carnitine	37663	27795	30471	92116	53804	48620	1.04227	2.02796	1.02003	up
Cmhp057	CAR C12:1-OH	Carnitine	377260	345590	321240	9	9	9	1.24342	2.58598e-05	-15.2389	down
Cmhp074	CAR C14-OH(3)	Carnitine	8058.3	7509.1	4763.7	27414	24009	21701	1.20535	3.59666	1.84666	up
Cmhp087	CAR C15:DC*	Carnitine	9	9	9	41555	26043	22480	1.24159	3336.22	11.704	up
Cmhp092	CAR C18:1	Carnitine	141420	141020	133450	347680	309910	245120	1.19632	2.17055	1.11806	up
Cmhp101	CAR C17:1:DC*	Carnitine	7544.6	9441.5	6017.4	35201	33180	21191	1.18795	3.89384	1.96119	up
Cmhp102	CAR C18:1-OH(3)	Carnitine	9321.1	7855.6	6743.2	46293	27389	30748	1.20687	4.36582	2.12625	up
Cmhp115	CAR C21:1	Carnitine	22299	19489	20851	12466	10027	6298.6	1.11693	0.459643	-1.12141	down
Cmhp123	CAR C22:1	Carnitine	207690	215320	206650	43103	40905	42830	1.24354	0.201439	-2.31159	down
Cmhp127	CAR C22:2-OH(3)	Carnitine	102290	89468	82210	23738	19627	15681	1.22491	0.215522	-2.2141	down
Cmmn0580	N-Acetyl-alpha-D-glucosamine 1-phosphate	Organic Acid And Its Derivatives	505990	282340	449420	215460	206070	181230	1.09183	0.48698	-1.03806	down
Cmmn9011	Pinolenic Acid	Lipids_Fatty Acids	316180	300260	314690	142010	125850	116420	1.2347	0.412703	-1.27682	down
Cmzn003	LysoPE 16:0	Lipids_Glycerophospholipids	71727000	68931000	71363000	20709000	17350000	17023000	1.23984	0.259795	-1.94455	down
Cmzn004	LysoPE 16:0 (2n isomer)	Lipids_Glycerophospholipids	71817000	66664000	69222000	19927000	16802000	16598000	1.23936	0.256746	-1.96158	down
Cmzn006	LysoPE 18:3 (2n isomer)	Lipids_Glycerophospholipids	1124300	905720	923240	146710	106350	81197	1.22755	0.113182	-3.14328	down
Cmzn008	LysoPE 18:2 (2n isomer)	Lipids_Glycerophospholipids	7422200	6439900	6450200	280140	270040	197590	1.2406	0.0368137	-4.76362	down
Cmzn009	LysoPE 18:1	Lipids_Glycerophospholipids	15689	4999.5	3712.9	78788	63850	60417	1.1728	8.32145	3.05683	up
Cmzn010	LysoPE 18:1 (2n isomer)	Lipids_Glycerophospholipids	1310100	1129300	1099500	148230	108940	81830	1.23081	0.0957925	-3.38394	down
Cmzn011	LysoPE 18:0	Lipids_Glycerophospholipids	52574000	53868000	54069000	11016000	10607000	12045000	1.24215	0.209755	-2.25322	down
Cmzn012	LysoPE 18:0 (2n isomer)	Lipids_Glycerophospholipids	54217000	52479000	56106000	11452000	10554000	12103000	1.24185	0.209512	-2.25489	down
Cmzn013	LysoPE 20:5	Lipids_Glycerophospholipids	1085500	1028700	910470	390220	315920	346570	1.22781	0.348041	-1.52267	down
Cmzn014	LysoPE 20:5(2n isomer1)	Lipids_Glycerophospholipids	1133900	933030	920860	398480	303880	278780	1.21238	0.328383	-1.60655	down
Cmzn015	LysoPE 20:4	Lipids_Glycerophospholipids	11184000	10556000	9351600	6191300	4906000	4150300	1.1743	0.490409	-1.02794	down
Cmzn017	LysoPE 20:3	Lipids_Glycerophospholipids	642950	555760	552250	203840	151760	117770	1.20863	0.270349	-1.88711	down
Cmzn018	LysoPE 20:3(2n isomer1)	Lipids_Glycerophospholipids	653450	585050	636650	208040	163410	129890	1.22048	0.26736	-1.90314	down
Cmzn020	LysoPE 20:2	Lipids_Glycerophospholipids	753130	573270	563660	17744	9165.2	2067.1	1.19947	0.0153309	-6.02741	down
Cmzn037	PI 18:1	Lipids_Glycerophospholipids	294820	237680	256750	92546	74032	53736	1.20485	0.279143	-1.84092	down
Cmzp002	LysoPC 14:0 (2n isomer)	Lipids_Glycerophospholipids	39973000	34528000	34768000	7439600	5510100	4492100	1.22823	0.159623	-2.64726	down
Cmzp003	LysoPC 16:1	Lipids_Glycerophospholipids	6523600	5595100	4888300	3384000	2442600	1945000	1.13375	0.456965	-1.12985	down
Cmzp004	LysoPC 16:1 (2n isomer)	Lipids_Glycerophospholipids	92535000	75494000	74799000	28131000	20805000	16394000	1.20551	0.269038	-1.89412	down
Cmzp007	LysoPC 18:3 (2n isomer1)	Lipids_Glycerophospholipids	1251300	1408700	1092000	375630	272660	278470	1.2252	0.247004	-2.01739	down
Cmzp008	LysoPC 18:3 (2n isomer2)	Lipids_Glycerophospholipids	1132200	1155000	931660	263870	187750	184940	1.22759	0.197759	-2.33818	down
Cmzp010	LysoPC 18:2	Lipids_Glycerophospholipids	37713000	35685000	36314000	3345700	2662900	1616900	1.23093	0.0695047	-3.84675	down
Cmzp011	LysoPC 18:2 (2n isomer)	Lipids_Glycerophospholipids	39826000	34672000	34852000	3351900	2818400	1939600	1.2348	0.0741646	-3.75313	down
Cmzp012	LysoPC 18:1	Lipids_Glycerophospholipids	36361000	36666000	35460000	4130100	3750400	2752700	1.23868	0.0980136	-3.35087	down
Cmzp013	LysoPC 18:1 (2n isomer)	Lipids_Glycerophospholipids	39251000	32443000	35302000	4012500	2830600	2733900	1.23689	0.089508	-3.48184	down
Cmzp014	LysoPC 18:0	Lipids_Glycerophospholipids	98834000	92268000	92648000	11030000	8958600	7939600	1.24031	0.0984254	-3.34483	down
Cmzp015	LysoPC 18:0 (2n isomer)	Lipids_Glycerophospholipids	97988000	91891000	89009000	10809000	9172300	8205500	1.24085	0.101069	-3.30659	down
Cmzp016	LysoPC 20:5 (2n isomer)	Lipids_Glycerophospholipids	7002600	5574600	5326400	2705800	2161000	1440400	1.16322	0.352287	-1.50518	down
Cmzp017	LysoPC 20:5	Lipids_Glycerophospholipids	7099900	5576300	5853200	2772100	2206600	1469700	1.16876	0.348009	-1.5228	down
Cmzp018	LysoPC 20:4	Lipids_Glycerophospholipids	34259000	30066000	29654000	14008000	11653000	9012700	1.20256	0.368952	-1.4385	down
Cmzp019	LysoPC 20:4 (2n isomer)	Lipids_Glycerophospholipids	20741000	17382000	16506000	9439400	7886200	6068700	1.17751	0.42824	-1.22351	down
Cmzp023	LysoPC 20:2	Lipids_Glycerophospholipids	8489500	7249000	6863500	468740	350950	254700	1.2353	0.0475352	-4.39486	down
Cmzp024	LysoPC 20:2 (2n isomer2)	Lipids_Glycerophospholipids	18315000	14993000	15335000	694840	570770	414180	1.23841	0.034533	-4.85588	down
Cmzp025	LysoPC 20:1	Lipids_Glycerophospholipids	4023800	3340400	3658300	121270	79643	68810	1.23921	0.0244702	-5.35283	down
Cmzp026	LysoPC 20:1 (2n isomer)	Lipids_Glycerophospholipids	4304900	3234500	3545500	89911	67701	70191	1.24077	0.0205507	-5.60467	down
Cmzp033	LysoPC 22:4	Lipids_Glycerophospholipids	150370	103880	122070	53224	42252	18748	1.10458	0.303529	-1.72009	down
Cmzp034	LysoPC 22:4 (2n isomer1)	Lipids_Glycerophospholipids	150270	75175	113140	55782	44679	28806	1.07309	0.381786	-1.38916	down
MEDN004	L-Cystine	Amino Acid metabolomics	28756	30998	28841	14870	12996	15970	1.22311	0.494791	-1.01511	down
MEDN010	L-Citrulline	Amino Acid metabolomics	948550	717280	753020	305520	286740	274300	1.21965	0.358253	-1.48095	down
MEDN017	L-Pyroglutamic Acid	Amino Acid metabolomics	45554	67481	92665	16652	22242	16392	1.18312	0.26877	-1.89556	down
MEDN056	N-Acetyl-L-Leucine	Amino Acid metabolomics	183190	143230	132170	29682	31646	38890	1.21976	0.218535	-2.19406	down
MEDN057	N-Acetyl-L-Tyrosine	Amino Acid metabolomics	55642	47836	39258	10623	6931.2	5730	1.21281	0.163128	-2.61593	down
MEDN059	N-Glycyl-L-Leucine	Amino Acid metabolomics	82173	74849	60026	43042	35082	26503	1.13073	0.482045	-1.05276	down
MEDN068	S-(5-Adenosy)-L-Homocysteine	Amino Acid metabolomics	1516900	1432100	1135000	640650	489910	482440	1.19686	0.394956	-1.34024	down
MEDN122	Inositol	Carbohydrate metabolomics	474770	461500	445090	205950	219530	233160	1.23273	0.476805	-1.06853	down
MEDN140	2,6-Dihydroxypurine	Nucleotide metabolomics	4820200	4861700	4516100	605270	451650	567980	1.23939	0.114446	-3.12726	down
MEDN143	3'-Aenylic Acid	Nucleotide metabolomics	11610000	9899600	9356600	5379900	4218500	4460200	1.2039	0.455469	-1.13457	down
MEDN156	Cytidine-5-Monophosphate	Nucleotide metabolomics	324910	247980	199780	127380	123930	103390	1.14182	0.459058	-1.12325	down
MEDN163	Hypoxanthine	Nucleotide metabolomics	6796200	7042200	7666500	1348000	1273000	1013200	1.24001	0.168994	-2.56496	down
MEDN171	Uridine	Nucleotide metabolomics	1059200	976020	1158500	261500	262790	196110	1.23367	0.225568	-2.14837	down
MEDN198	Citric Acid	Amino Acid metabolomics	1099500	667620	588390	3655400	2057400	1688500	1.10207	3.14212	1.65174	up
MEDN237	D-Glucoronic Acid	Carbohydrate metabolomics	115000	110700	93399	34299	36709	51368	1.18646	0.383505	-1.38268	down
MEDN244	Orotic Acid	CoOthersEnzyme Factor & vitamin	2126400	1675700	1337300	75246	62792	73797	1.23559	0.0412178	-4.60059	down
MEDN283	2-Hydroxybutanoic Acid	Organic Acid And Its Derivatives	586750	518480	522440	155380	104510	97044	1.2221	0.219291	-2.18908	down
MEDN285	2-Methylsuccinic Acid	Organic Acid And Its Derivatives	1172700	779700	787970	17260000	12836000	12253000	1.2362	15.4538	3.94989	up
MEDN314	Glutaric Acid	Organic Acid And Its Derivatives	1167500	816110	876920	18430000	13703000	13185000	1.23753	15.8425	3.98573	up
MEDN316	Guanidinoethyl Sulfonate	Organic Acid And Its Derivatives	23745	23096	18322	8503.7	7157.5	10452	1.18494	0.400737	-1.31927	down
MEDN321	Kinic Acid	Organic Acid And Its Derivatives	92002	94624	70493	367840	219830	167590	1.11649	2.93739	1.55454	up
MEDN325	L-Lactic Acid	Organic Acid And Its Derivatives	448020	322730	328420	106800	67829	104420	1.19797	0.253872	-1.97782	down
MEDN351	12-Hete	Lipids_Fatty Acids	2590600	2241300	2133700	1038200	779420	726420	1.20824	0.365229	-1.45313	down
MEDN368	Lysope 14:0	Lipids_Glycerophospholipids	976950	882150	866920	125850	98860	86417	1.23751	0.114132	-3.13122	down
MEDN378	γ-Linolenic Acid(C18:3N6)	Lipids_Fatty Acids	189220	173170	163670	70018	68176	51057	1.21668	0.359752	-1.47493	down
MEDN400	Α-Linolenic Acid(C18:3N3)	Lipids_Fatty Acids	232500	216370	203420	94105	90339	74332	1.22423	0.396719	-1.33381	down
MEDN413	Ethylmalonate	Organic Acid And Its Derivatives	8095.5	7175.3	6966.2	113420	78666	87360	1.23842	12.5667	3.65154	up
MEDN434	Β-Pseudouridine	Nucleotide metabolomics	52838	110310	87413	24698	13370	18442	1.17396	0.225534	-2.14858	down
MEDN439	N-Acetylthreonine	Amino Acid metabolomics	51364	73712	60108	40885	28870	20631	1.08129	0.488088	-1.03479	down
MEDN455	Guanine	Nucleotide metabolomics	45894	28708	33302	15587	13342	7866	1.13141	0.340998	-1.55217	down
MEDN469	Citraconic Acid	Organic Acid And Its Derivatives	9	9	9	52220	45046	45633	1.24353	5292.56	12.3697	up
MEDN528	(3-Methoxy-4-hydroxyphenyl)ethylene glycol sulfate	Organic Acid And Its Derivatives	33021	31330	28552	12618	17322	9700	1.1563	0.426682	-1.22877	down
MEDN531	D-Glucarate	Carbohydrate metabolomics	22934	29621	25239	13280	5133.2	12831	1.04958	0.401627	-1.31607	down
MEDN533	Xanthosine	Nucleotide metabolomics	1299900	1050200	1003800	51126	52005	70247	1.23586	0.0516944	-4.27385	down
MEDN537	ADP-ribose	Nucleotide metabolomics	446910	491360	508790	4572300	3736200	3749100	1.23795	8.33248	3.05875	up
MEDN553	2-Methylbenzoic acid	Benzene and substituted derivatives	1052800	911360	1097100	214310	158540	172030	1.23618	0.177992	-2.49012	down
MEDN563	DL-Benzylsuccinic acid	Organic Acid And Its Derivatives	11125	18604	24289	65077	61524	40158	1.10502	3.0871	1.62625	up
MEDN579	N-lactoyl-phenylalanine	Amino Acid metabolomics	69090	66415	61057	9834.8	8669.8	6085.7	1.23282	0.125102	-2.99882	down
MEDN656	Indoleacetaldehyde	Indole And Its Derivatives	626470	598040	603520	329420	266760	286190	1.22663	0.482689	-1.05083	down
MEDN750	(±)12-HEPE [(±)-12-hydroxy-5Z,8Z,10E,14Z,17Z-eicosapentaenoic acid]	Oxidized lipid	710840	583790	569120	336560	258650	259760	1.19322	0.458736	-1.12426	down
MEDN751	(±)12-HETE [(±)12-hydroxy-5Z,8Z,10E,14Z-eicosatetraenoic acid]	Oxidized lipid	4099400	3570500	3504400	1707600	1328100	1249500	1.21397	0.383487	-1.38275	down
MEDN753	(±)16-HETE [(±)16-hydroxy-5Z,8Z,11Z,14Z-eicosatetraenoic acid]	Oxidized lipid	23429	18962	20018	10158	7127.5	6525.4	1.19067	0.38153	-1.39013	down
MEDN756	(±)18-HEPE [(±)-18-hydroxy-5Z,8Z,11Z,14Z,16E-eicosapentaenoic acid]	Oxidized lipid	542200	455510	454830	270750	202770	172510	1.17514	0.444759	-1.1689	down
MEDN759	(±)5-HEPE [(±)-5-hydroxy-6E,8Z,11Z,14Z,17Z-eicosapentaenoic acid]	Oxidized lipid	81678	65353	71980	41738	33004	30291	1.18746	0.479579	-1.06016	down
MEDN763	(±)9-HETE [(±)-9-hydroxy-5Z,7E,11Z,14Z-eicosatetraenoic acid]	Oxidized lipid	133970	115360	105720	69360	57993	47566	1.16853	0.49266	-1.02134	down
MEDN769	14(S)-HDHA [14S-hydroxy-4Z,7Z,10Z,12E,16Z,19Z-docosahexaenoic acid]	Oxidized lipid	282410	224470	234630	86596	64071	62941	1.21891	0.288072	-1.7955	down
MEDN776	5(S),15(S)-DiHETE [5S,15S-dihydroxy-6E,8Z,10Z,13E-eicosatetraenoic acid]	Oxidized lipid	33774	31370	31833	15214	13327	14242	1.23584	0.441166	-1.1806	down
MEDN808	Myoinositol	Carbohydrate metabolomics	476820	434890	403190	186370	179240	202030	1.22603	0.431698	-1.2119	down
MEDP017	L-Histidine	Amino Acid metabolomics	50575000	50130000	49757000	25879000	23527000	23360000	1.23982	0.483617	-1.04806	down
MEDP043	Glutathione Oxidized	Amino Acid metabolomics	551700	390200	401970	2074000	1778300	1390300	1.21293	3.90112	1.96389	up
MEDP051	L-Cystathionine	Amino Acid metabolomics	6460800	6894200	7007700	879350	725830	775000	1.24342	0.116889	-3.09679	down
MEDP062	N6-Acetyl-L-Lysine	Amino Acid metabolomics	82517	76625	39961	313190	341160	132000	1.08492	3.94946	1.98166	up
MEDP075	Nα-Acetyl-L-Arginine	Amino Acid metabolomics	107230	107770	105200	44486	29199	26774	1.20698	0.313738	-1.67237	down
MEDP082	S-Sulfo-L-Cysteine	Amino Acid metabolomics	54381	55191	58178	26437	22049	16600	1.203	0.387994	-1.36589	down
MEDP086	Urea	Amino Acid metabolomics	199430	227800	213950	23655	39648	55722	1.19047	0.185634	-2.42946	down
MEDP089	N-Acetylhistamine	Amines	156840	95146	105820	15654	21661	14993	1.21432	0.146191	-2.77407	down
MEDP123	Acetylcholine Chloride	Tryptamine, Choline, pigment	794290	658880	714940	359040	332060	291780	1.21758	0.453335	-1.14135	down
MEDP125	Choline	Tryptamine, Choline, pigment	379820	336390	353320	147120	122510	94111	1.21049	0.340094	-1.55599	down
MEDP149	2'-Deoxyadenosine-5'-Monophosphate	Nucleotide metabolomics	1847400	1164300	1371300	814550	635980	653530	1.13449	0.48005	-1.05874	down
MEDP150	2'-Deoxyinosine	Nucleotide metabolomics	32070	30002	33180	105220	73729	89529	1.21513	2.81861	1.49498	up
MEDP151	2-Hydroxy-6-Aminopurine	Nucleotide metabolomics	565030	383660	485270	166070	182180	148960	1.20531	0.346739	-1.52808	down
MEDP160	Adenosine	Nucleotide metabolomics	48838000	39602000	41050000	21599000	15720000	13725000	1.187	0.394193	-1.34303	down
MEDP178	Uracil	Nucleotide metabolomics	764380	457070	649280	158950	179310	144290	1.20414	0.257947	-1.95485	down
MEDP232	N-Acetyl-D-Glucosamine	Carbohydrate metabolomics	52238	40628	49802	113350	105510	95489	1.21228	2.20336	1.13971	up
MEDP244	All-Trans-13,14-Dihydroretinol	CoOthersEnzyme Factor & vitamin	187170	184150	181370	33786	28453	23987	1.23853	0.156012	-2.68028	down
MEDP251	Trigonelline	CoOthersEnzyme Factor & vitamin	137560	116660	97859	39207	18781	23215	1.18486	0.230639	-2.11629	down
MEDP275	Indole-3-Acetic Acid	Indole And Its Derivatives	768620	657600	701610	348300	288530	319660	1.22314	0.449514	-1.15356	down
MEDP286	2-Aminoethanesulfinic Acid	Organic Acid And Its Derivatives	169900	245730	241970	87357	74881	61932	1.20539	0.340891	-1.55262	down
MEDP296	4-Guanidinobutyric Acid	Organic Acid And Its Derivatives	13826000	12401000	11803000	5574600	4941800	4374900	1.22346	0.391567	-1.35267	down
MEDP297	5-Aminovaleric Acid	Organic Acid And Its Derivatives	152690	166140	149940	100160	43242	39364	1.08691	0.389884	-1.35888	down
MEDP298	6-Aminocaproic Acid	Organic Acid And Its Derivatives	15986000	12778000	11937000	6980400	5360500	4524500	1.17345	0.414373	-1.271	down
MEDP313	Guanidineacetic Acid	Organic Acid And Its Derivatives	144550	115460	108110	34402	29754	23945	1.21976	0.239327	-2.06295	down
MEDP316	Homovanillic Acid	Organic Acid And Its Derivatives	6297700	4668900	5582000	3377400	2314300	2261800	1.14749	0.480615	-1.05705	down
MEDP325	Maleic Acid	Organic Acid And Its Derivatives	4521300	4160600	4049700	2012100	1786300	1648900	1.22853	0.427857	-1.2248	down
MEDP336	Lysopc 14:0	Lipids_Glycerophospholipids	31807000	26347000	26482000	5416400	4341800	3569400	1.23093	0.15747	-2.66685	down
MEDP405	3-Aminoisobutanoic Acid	Amino Acid metabolomics	289010	259770	231140	151310	108400	92024	1.15877	0.450987	-1.14884	down
MEDP456	Piperidine	Benzene and substituted derivatives	1399300	991810	948600	731580	453880	407240	1.07594	0.476898	-1.06825	down
MEDP461	2-Methylguanosine	Nucleotide metabolomics	479430	363740	419120	198750	160680	170290	1.20841	0.41965	-1.25274	down
MEDP494	Lysopc 15:0	Lipids_Glycerophospholipids	12539000	10627000	11026000	2333500	1822700	1418600	1.22821	0.163044	-2.61667	down
MEDP498	Lysopc 18:3	Lipids_Glycerophospholipids	29661000	29365000	29573000	15009000	14868000	14052000	1.24247	0.495818	-1.01212	down
MEDP537	PAF C-16	Lipids_others	104830000	99699000	101380000	13280000	10950000	9608600	1.24049	0.110617	-3.17636	down
MEDP538	LTD4 [5S-hydroxy-6R-(S-cysteinylglycinyl)-7E,9E,11Z,14Z-eicosatetraenoic acid]	Lipids_Fatty Acids	23900000	22004000	22244000	6265300	5516300	4505700	1.23338	0.238999	-2.06492	down
MEDP577	Isobutyryl carnitine (CAR C4:0)	Carnitine	1227500	1030300	1034700	316790	162910	184470	1.20578	0.201722	-2.30956	down
MEDP583	Asp-Phe methyl ester	Others	1871100	1483200	1395500	926860	700800	619140	1.15425	0.47303	-1.08	down
MEDP601	Spermidine	Amines	4531200	2734000	2474600	668800	394890	323710	1.19115	0.142446	-2.81151	down
MEDP618	2-Methylbutyroylcarnitine (CAR C5:0)	Carnitine	833200	670620	714810	272080	173150	191240	1.20985	0.286875	-1.8015	down
MEDP631	Dimethyl fumarate	Aldehydes, ketones, esters	309630	649610	586500	222030	229030	228550	1.08374	0.439666	-1.18552	down
MEDP664	L- tyrosine methyl ester	Amino Acid metabolomics	293030	266440	267240	123090	88866	81260	1.20993	0.354678	-1.49542	down
MEDP746	gamma-Terpinene	Others	10761000	11985000	11834000	25608000	22344000	22338000	1.22243	2.03268	1.02338	up
MEDP783	10-UNDECENOIC ACID	Lipids_Fatty Acids	764470	685030	738890	1741300	1380200	1303200	1.19754	2.0219	1.01571	up
MEDP845	1-Phenylethanol	Benzene and substituted derivatives	2946300	2733000	2733300	6770000	5422800	5026400	1.20095	2.04683	1.03339	up
MEDP849	Nα-Acetyl-L-glutamine	Amino Acid metabolomics	306000	296220	307040	53509	99301	65339	1.20449	0.239919	-2.05938	down
MEDP853	Choline chloride	Tryptamine, Choline, pigment	26039000	23388000	21680000	8677500	7201800	7952700	1.22951	0.335157	-1.57709	down
Whmp0305	Oxypurinol	Nucleotide metabolomics	6248700	5511700	5421400	799690	701020	679970	1.24049	0.126918	-2.97803	down
Wmjn1221	DL-p-Hydroxyphenyllactic acid	Organic Acid And Its Derivatives	109760	76722	41447	138720	165400	159460	1.02313	2.03388	1.02423	up
Wmjn1628	Riboflavin-5'-monophosphate	Nucleotide metabolomics	100090	80165	82176	45610	36996	30009	1.18205	0.429122	-1.22054	down
Wmjp0053	2-Aminomethylpyrimidine (hydrochloride)	Nucleotide metabolomics	520400	522120	474390	229410	235630	210700	1.23469	0.445471	-1.1666	down
Wmjp0774	ALANYL-dl-LEUCINE	Amino Acid metabolomics	150670	136930	118310	79902	66279	55504	1.16949	0.496871	-1.00906	down
Wmjp0785	Threoninyl-Phenylalanine	Amino Acid metabolomics	265920	217880	142850	123890	54657	54152	1.04775	0.371338	-1.42919	down
Wmjp0837	Indole-3-carboxyaldehyde	Indole And Its Derivatives	131370	124000	112230	63559	52119	41851	1.19278	0.428534	-1.22252	down

## Sheet: S1-5 vs S1-0
Index	Compounds	Class	S1-0a	S1-0b	S1-0c	S1-5a	S1-5b	S1-5c	VIP	Fold_Change	Log2FC	Type
Cmhp003	CAR C3:0	Carnitine	2269800	2004600	1952100	976350	622220	663670	1.19359	0.363325	-1.46067	down
Cmhp013	CAR C4:DC	Carnitine	307230	239120	213750	81842	79318	50421	1.18797	0.278359	-1.84498	down
Cmhp014	CAR C5-OH(3)	Carnitine	405040	344100	271690	113220	74838	78946	1.20249	0.261556	-1.93481	down
Cmhp015	CAR ph-C1	Carnitine	26647	23766	14958	14707	6071.1	7700.9	1.01013	0.435652	-1.19875	down
Cmhp020	CAR C6-OH(3)	Carnitine	86948	79438	87080	20567	22414	24148	1.23461	0.264844	-1.91678	down
Cmhp057	CAR C12:1-OH	Carnitine	377260	345590	321240	9	9	9	1.23956	2.58598e-05	-15.2389	down
Cmhp074	CAR C14-OH(3)	Carnitine	8058.3	7509.1	4763.7	17199	18181	11000	1.08391	2.28123	1.18981	up
Cmhp101	CAR C17:1:DC*	Carnitine	7544.6	9441.5	6017.4	21659	18082	16448	1.16987	2.44263	1.28843	up
Cmhp102	CAR C18:1-OH(3)	Carnitine	9321.1	7855.6	6743.2	25134	18704	17576	1.18284	2.56749	1.36036	up
Cmhp106	CAR ph-C14	Carnitine	54088	38656	37299	19797	16783	17428	1.18893	0.415309	-1.26774	down
Cmhp115	CAR C21:1	Carnitine	22299	19489	20851	4220.3	8636.2	5308.8	1.17067	0.29	-1.78588	down
Cmhp123	CAR C22:1	Carnitine	207690	215320	206650	38242	34632	36930	1.23941	0.174386	-2.51964	down
Cmhp127	CAR C22:2-OH(3)	Carnitine	102290	89468	82210	24605	18533	21006	1.22865	0.23413	-2.09462	down
Cmmn0580	N-Acetyl-alpha-D-glucosamine 1-phosphate	Organic Acid And Its Derivatives	505990	282340	449420	148760	105750	62479	1.12993	0.256101	-1.96522	down
Cmmn9011	Pinolenic Acid	Lipids_Fatty Acids	316180	300260	314690	98227	74224	75407	1.2286	0.266191	-1.90947	down
Cmzn003	LysoPE 16:0	Lipids_Glycerophospholipids	71727000	68931000	71363000	18180000	13857000	14387000	1.23259	0.218959	-2.19126	down
Cmzn004	LysoPE 16:0 (2n isomer)	Lipids_Glycerophospholipids	71817000	66664000	69222000	17808000	13934000	15221000	1.23417	0.226107	-2.14493	down
Cmzn006	LysoPE 18:3 (2n isomer)	Lipids_Glycerophospholipids	1124300	905720	923240	121200	61785	80049	1.22367	0.0890656	-3.48899	down
Cmzn008	LysoPE 18:2 (2n isomer)	Lipids_Glycerophospholipids	7422200	6439900	6450200	405370	315260	398420	1.23767	0.0550922	-4.18201	down
Cmzn009	LysoPE 18:1	Lipids_Glycerophospholipids	15689	4999.5	3712.9	100130	87981	73697	1.17075	10.7292	3.42347	up
Cmzn010	LysoPE 18:1 (2n isomer)	Lipids_Glycerophospholipids	1310100	1129300	1099500	141420	93861	97467	1.23172	0.0940258	-3.4108	down
Cmzn011	LysoPE 18:0	Lipids_Glycerophospholipids	52574000	53868000	54069000	11458000	10695000	10965000	1.23941	0.206329	-2.27698	down
Cmzn012	LysoPE 18:0 (2n isomer)	Lipids_Glycerophospholipids	54217000	52479000	56106000	11996000	10692000	11162000	1.23824	0.207921	-2.26589	down
Cmzn013	LysoPE 20:5	Lipids_Glycerophospholipids	1085500	1028700	910470	483850	367340	346070	1.2052	0.395832	-1.33704	down
Cmzn014	LysoPE 20:5(2n isomer1)	Lipids_Glycerophospholipids	1133900	933030	920860	499180	361010	351790	1.19235	0.405644	-1.30171	down
Cmzn017	LysoPE 20:3	Lipids_Glycerophospholipids	642950	555760	552250	216560	166420	158890	1.21982	0.30947	-1.69213	down
Cmzn018	LysoPE 20:3(2n isomer1)	Lipids_Glycerophospholipids	653450	585050	636650	208430	170570	178320	1.23191	0.297214	-1.75043	down
Cmzn020	LysoPE 20:2	Lipids_Glycerophospholipids	753130	573270	563660	23364	15932	18896	1.23591	0.0307884	-5.02147	down
Cmzn037	PI 18:1	Lipids_Glycerophospholipids	294820	237680	256750	115390	59286	72219	1.17395	0.312822	-1.67658	down
Cmzp002	LysoPC 14:0 (2n isomer)	Lipids_Glycerophospholipids	39973000	34528000	34768000	6671500	4702900	5575200	1.23196	0.155118	-2.68856	down
Cmzp003	LysoPC 16:1	Lipids_Glycerophospholipids	6523600	5595100	4888300	2768600	1688400	1786700	1.17403	0.367125	-1.44566	down
Cmzp004	LysoPC 16:1 (2n isomer)	Lipids_Glycerophospholipids	92535000	75494000	74799000	24251000	14971000	16783000	1.21294	0.230636	-2.11631	down
Cmzp007	LysoPC 18:3 (2n isomer1)	Lipids_Glycerophospholipids	1251300	1408700	1092000	214270	158750	191080	1.23291	0.150346	-2.73364	down
Cmzp008	LysoPC 18:3 (2n isomer2)	Lipids_Glycerophospholipids	1132200	1155000	931660	209210	165360	160220	1.23201	0.166143	-2.58951	down
Cmzp010	LysoPC 18:2	Lipids_Glycerophospholipids	37713000	35685000	36314000	4954400	3056300	4132700	1.23114	0.110684	-3.17548	down
Cmzp011	LysoPC 18:2 (2n isomer)	Lipids_Glycerophospholipids	39826000	34672000	34852000	5185100	3303800	4503200	1.23056	0.118812	-3.07325	down
Cmzp012	LysoPC 18:1	Lipids_Glycerophospholipids	36361000	36666000	35460000	7032000	5199000	6553900	1.23446	0.173153	-2.52988	down
Cmzp013	LysoPC 18:1 (2n isomer)	Lipids_Glycerophospholipids	39251000	32443000	35302000	7114900	5265300	6559300	1.23137	0.177011	-2.49809	down
Cmzp014	LysoPC 18:0	Lipids_Glycerophospholipids	98834000	92268000	92648000	10706000	7691400	8732200	1.23609	0.0956109	-3.38668	down
Cmzp015	LysoPC 18:0 (2n isomer)	Lipids_Glycerophospholipids	97988000	91891000	89009000	10916000	7437800	8508900	1.23469	0.0963207	-3.37601	down
Cmzp016	LysoPC 20:5 (2n isomer)	Lipids_Glycerophospholipids	7002600	5574600	5326400	2896000	1957200	1930800	1.18183	0.378918	-1.40004	down
Cmzp017	LysoPC 20:5	Lipids_Glycerophospholipids	7099900	5576300	5853200	2914300	1921400	1880000	1.18446	0.362435	-1.46421	down
Cmzp018	LysoPC 20:4	Lipids_Glycerophospholipids	34259000	30066000	29654000	14126000	9352000	10761000	1.20395	0.364326	-1.4567	down
Cmzp019	LysoPC 20:4 (2n isomer)	Lipids_Glycerophospholipids	20741000	17382000	16506000	10568000	6862400	6327600	1.15025	0.434897	-1.20125	down
Cmzp023	LysoPC 20:2	Lipids_Glycerophospholipids	8489500	7249000	6863500	593760	405500	584580	1.23412	0.0700752	-3.83495	down
Cmzp024	LysoPC 20:2 (2n isomer2)	Lipids_Glycerophospholipids	18315000	14993000	15335000	972230	657930	1001400	1.23426	0.0540995	-4.20824	down
Cmzp025	LysoPC 20:1	Lipids_Glycerophospholipids	4023800	3340400	3658300	120770	81822	151050	1.23347	0.0320836	-4.96202	down
Cmzp026	LysoPC 20:1 (2n isomer)	Lipids_Glycerophospholipids	4304900	3234500	3545500	128180	85463	156550	1.23244	0.0333962	-4.90417	down
Cmzp029	LysoPC 22:5	Lipids_Glycerophospholipids	16342000	13871000	14109000	7014900	4888300	4857200	1.19848	0.378151	-1.40297	down
Cmzp030	LysoPC 22:5 (2n isomer1)	Lipids_Glycerophospholipids	16350000	13883000	13239000	7422100	5301500	4876700	1.18436	0.404865	-1.30449	down
Cmzp031	LysoPC 22:5 (2n isomer2)	Lipids_Glycerophospholipids	16811000	13915000	12460000	7175500	5225900	5135400	1.18651	0.406076	-1.30018	down
Cmzp032	LysoPC 22:5 (2n isomer3)	Lipids_Glycerophospholipids	16056000	13008000	12635000	7233300	4907000	4669800	1.17445	0.40313	-1.31068	down
Cmzp033	LysoPC 22:4	Lipids_Glycerophospholipids	150370	103880	122070	35362	15677	21093	1.18692	0.191677	-2.38325	down
Cmzp034	LysoPC 22:4 (2n isomer1)	Lipids_Glycerophospholipids	150270	75175	113140	32542	18948	21688	1.17293	0.216129	-2.21004	down
MEDN010	L-Citrulline	Amino Acid metabolomics	948550	717280	753020	208950	158050	197250	1.22369	0.233272	-2.09991	down
MEDN028	4-Hydroxy-L-Glutamic Acid	Amino Acid metabolomics	321610	234190	263860	82349	63224	76236	1.21915	0.270611	-1.88571	down
MEDN056	N-Acetyl-L-Leucine	Amino Acid metabolomics	183190	143230	132170	80387	73019	58398	1.16798	0.461859	-1.11448	down
MEDN057	N-Acetyl-L-Tyrosine	Amino Acid metabolomics	55642	47836	39258	7522	3360	14296	1.1332	0.176396	-2.50311	down
MEDN059	N-Glycyl-L-Leucine	Amino Acid metabolomics	82173	74849	60026	34183	22113	23821	1.18241	0.369121	-1.43783	down
MEDN122	Inositol	Carbohydrate metabolomics	474770	461500	445090	178740	165780	163120	1.23724	0.367493	-1.44421	down
MEDN138	1-Methylhistidine	Amino Acid metabolomics	21013	14894	17999	48021	39797	52502	1.19715	2.60305	1.3802	up
MEDN140	2,6-Dihydroxypurine	Nucleotide metabolomics	4820200	4861700	4516100	459710	414600	50898	1.12248	0.0651647	-3.93977	down
MEDN143	3'-Aenylic Acid	Nucleotide metabolomics	11610000	9899600	9356600	4037800	2223200	2091000	1.18061	0.270587	-1.88583	down
MEDN156	Cytidine-5-Monophosphate	Nucleotide metabolomics	324910	247980	199780	54236	44931	15650	1.1462	0.148598	-2.75052	down
MEDN159	Flavin Adenine Dinucleotide	Nucleotide metabolomics	458430	395550	379010	238310	177300	170600	1.18215	0.475438	-1.07267	down
MEDN161	Guanosine 3',5'-Cyclic Monophosphate	Nucleotide metabolomics	233920	173360	154030	72997	61484	44518	1.17572	0.318895	-1.64885	down
MEDN171	Uridine	Nucleotide metabolomics	1059200	976020	1158500	183350	134810	141720	1.23232	0.143995	-2.79591	down
MEDN200	L-Malic Acid	Amino Acid metabolomics	5611000	2971400	3237600	1752700	1343900	489570	1.02121	0.303398	-1.72071	down
MEDN237	D-Glucoronic Acid	Carbohydrate metabolomics	115000	110700	93399	42535	40205	58720	1.18201	0.443311	-1.17361	down
MEDN244	Orotic Acid	CoOthersEnzyme Factor & vitamin	2126400	1675700	1337300	124640	101340	4908	1.07793	0.0449251	-4.47633	down
MEDN283	2-Hydroxybutanoic Acid	Organic Acid And Its Derivatives	586750	518480	522440	309680	240890	242500	1.20282	0.487243	-1.03729	down
MEDN285	2-Methylsuccinic Acid	Organic Acid And Its Derivatives	1172700	779700	787970	9857500	7863500	7371300	1.22694	9.15654	3.1948	up
MEDN314	Glutaric Acid	Organic Acid And Its Derivatives	1167500	816110	876920	10424000	7940600	7861700	1.22939	9.16834	3.19666	up
MEDN316	Guanidinoethyl Sulfonate	Organic Acid And Its Derivatives	23745	23096	18322	7138.5	3265.3	1359.7	1.10661	0.180524	-2.46974	down
MEDN325	L-Lactic Acid	Organic Acid And Its Derivatives	448020	322730	328420	121020	105260	117400	1.216	0.312672	-1.67728	down
MEDN351	12-Hete	Lipids_Fatty Acids	2590600	2241300	2133700	1084700	894940	858670	1.21495	0.407475	-1.29522	down
MEDN368	Lysope 14:0	Lipids_Glycerophospholipids	976950	882150	866920	106890	73086	85489	1.23453	0.0973819	-3.3602	down
MEDN378	γ-Linolenic Acid(C18:3N6)	Lipids_Fatty Acids	189220	173170	163670	57012	41443	40946	1.22252	0.264991	-1.91599	down
MEDN394	Cis-11,14-Eicosadienoic Acid (C20:2)	Lipids_Fatty Acids	20135	14716	11817	7609.7	6783.5	6840.8	1.14613	0.455001	-1.13606	down
MEDN400	Α-Linolenic Acid(C18:3N3)	Lipids_Fatty Acids	232500	216370	203420	75291	56951	56247	1.22439	0.288965	-1.79103	down
MEDN413	Ethylmalonate	Organic Acid And Its Derivatives	8095.5	7175.3	6966.2	54583	50766	49047	1.23748	6.9432	2.7956	up
MEDN419	Uridine 5-Monophosphate	Nucleotide metabolomics	22551000	20983000	22192000	7328400	6524400	3848800	1.18706	0.269324	-1.89258	down
MEDN434	Β-Pseudouridine	Nucleotide metabolomics	52838	110310	87413	16693	16008	3602.5	1.09607	0.144889	-2.78698	down
MEDN498	Ribulose-5-Phosphate	Carbohydrate metabolomics	7634900	7437300	6757600	3827300	3196500	2803500	1.20576	0.450178	-1.15143	down
MEDN506	N-Acetylglucosamine 1-Phosphate	Carbohydrate metabolomics	3968900	3625000	3998800	1269200	1139800	957450	1.22647	0.290394	-1.78392	down
MEDN531	D-Glucarate	Carbohydrate metabolomics	22934	29621	25239	9185.9	8356.9	6254.7	1.20848	0.305904	-1.70885	down
MEDN533	Xanthosine	Nucleotide metabolomics	1299900	1050200	1003800	170600	189050	151650	1.23144	0.152449	-2.7136	down
MEDN536	estrone 3-sulfate	Hormones	7314.9	5299.7	5501.5	2679	2969.6	2863.7	1.19004	0.469875	-1.08965	down
MEDN537	ADP-ribose	Nucleotide metabolomics	446910	491360	508790	6657200	6862300	5578800	1.23788	13.198	3.72225	up
MEDN553	2-Methylbenzoic acid	Benzene and substituted derivatives	1052800	911360	1097100	223540	187200	178650	1.23199	0.192532	-2.37683	down
MEDN563	DL-Benzylsuccinic acid	Organic Acid And Its Derivatives	11125	18604	24289	74098	33474	48892	1.05355	2.89652	1.53432	up
MEDN579	N-lactoyl-phenylalanine	Amino Acid metabolomics	69090	66415	61057	18102	15444	11450	1.21849	0.228915	-2.12712	down
MEDN641	Ribose 1-phosphate	Carbohydrate metabolomics	3286200	2986600	3017100	1626900	1298700	1239700	1.21119	0.448369	-1.15724	down
MEDN651	Succinic anhydride	Organic Acid And Its Derivatives	10360000	8068300	8269900	5333600	4748800	2946100	1.09058	0.487992	-1.03507	down
MEDN657	D-Xylulose 5-phosphate	Carbohydrate metabolomics	14415000	14328000	13071000	7190400	6129600	5052300	1.20122	0.439382	-1.18645	down
MEDN750	(±)12-HEPE [(±)-12-hydroxy-5Z,8Z,10E,14Z,17Z-eicosapentaenoic acid]	Oxidized lipid	710840	583790	569120	342190	258160	253950	1.18697	0.458377	-1.12539	down
MEDN751	(±)12-HETE [(±)12-hydroxy-5Z,8Z,10E,14Z-eicosatetraenoic acid]	Oxidized lipid	4099400	3570500	3504400	1785400	1381600	1329300	1.20927	0.402379	-1.31337	down
MEDN753	(±)16-HETE [(±)16-hydroxy-5Z,8Z,11Z,14Z-eicosatetraenoic acid]	Oxidized lipid	23429	18962	20018	6923.3	7965.7	7400.7	1.22468	0.357155	-1.48538	down
MEDN756	(±)18-HEPE [(±)-18-hydroxy-5Z,8Z,11Z,14Z,16E-eicosapentaenoic acid]	Oxidized lipid	542200	455510	454830	255020	198860	171240	1.18599	0.430363	-1.21637	down
MEDN759	(±)5-HEPE [(±)-5-hydroxy-6E,8Z,11Z,14Z,17Z-eicosapentaenoic acid]	Oxidized lipid	81678	65353	71980	32825	26692	24381	1.2084	0.383077	-1.3843	down
MEDN763	(±)9-HETE [(±)-9-hydroxy-5Z,7E,11Z,14Z-eicosatetraenoic acid]	Oxidized lipid	133970	115360	105720	75081	56509	41520	1.11037	0.487565	-1.03633	down
MEDN769	14(S)-HDHA [14S-hydroxy-4Z,7Z,10Z,12E,16Z,19Z-docosahexaenoic acid]	Oxidized lipid	282410	224470	234630	70108	64855	56614	1.227	0.258361	-1.95254	down
MEDN776	5(S),15(S)-DiHETE [5S,15S-dihydroxy-6E,8Z,10Z,13E-eicosatetraenoic acid]	Oxidized lipid	33774	31370	31833	4075.7	4862	5149.8	1.23551	0.145266	-2.78323	down
MEDN779	5-HETrE [5S-hydroxy-6E,8Z,11Z-eicosatrienoic acid]	Oxidized lipid	27449	22081	19055	12701	8859.8	10279	1.1591	0.464239	-1.10706	down
MEDN791	PGD1 [9α,15S-dihydroxy-11-oxo-prost-13E-en-1-oic acid]	Oxidized lipid	22276	15119	17228	7042.4	5787.7	5023.3	1.19568	0.326848	-1.61331	down
MEDN792	PGE1 [9-oxo-11α,15S-dihydroxy-prost-13E-en-1-oic acid]	Oxidized lipid	69121	63122	64113	27293	23276	22028	1.22777	0.369721	-1.43549	down
MEDN793	PGE2 [9-oxo-11α,15S-dihydroxy-prosta-5Z,13E-dien-1-oic acid]	Oxidized lipid	477620	402430	392260	234670	193920	177960	1.19547	0.476731	-1.06875	down
MEDN808	Myoinositol	Carbohydrate metabolomics	476820	434890	403190	159000	145880	158720	1.23344	0.352574	-1.504	down
MEDN821	Scyllo inositol	Alcohol	284880	331510	281100	107500	130750	135700	1.21524	0.416662	-1.26305	down
MEDP012	L-Ornithine	Amino Acid metabolomics	121760	141470	88659	48156	71205	35437	1.07088	0.439906	-1.18473	down
MEDP017	L-Histidine	Amino Acid metabolomics	50575000	50130000	49757000	24772000	22617000	23255000	1.23715	0.469514	-1.09076	down
MEDP043	Glutathione Oxidized	Amino Acid metabolomics	551700	390200	401970	2385100	1875200	1449500	1.20253	4.24877	2.08705	up
MEDP047	Histamine	Amines	1377100	1130400	1028400	623480	488470	614390	1.18153	0.488232	-1.03436	down
MEDP056	L-Homocystine	Amino Acid metabolomics	74435	48310	88826	29372	29057	24368	1.13751	0.391344	-1.35349	down
MEDP060	Methionine Sulfoxide	Amino Acid metabolomics	179190	154810	188320	458660	393730	343480	1.20493	2.28954	1.19505	up
MEDP062	N6-Acetyl-L-Lysine	Amino Acid metabolomics	82517	76625	39961	444420	467710	387090	1.20193	6.52537	2.70606	up
MEDP075	Nα-Acetyl-L-Arginine	Amino Acid metabolomics	107230	107770	105200	51914	42399	41685	1.22439	0.424728	-1.23539	down
MEDP082	S-Sulfo-L-Cysteine	Amino Acid metabolomics	54381	55191	58178	34581	24783	20616	1.15155	0.476781	-1.0686	down
MEDP086	Urea	Amino Acid metabolomics	199430	227800	213950	27661	40367	37797	1.22758	0.165047	-2.59905	down
MEDP089	N-Acetylhistamine	Amines	156840	95146	105820	9536.3	10887	8848.9	1.22758	0.0818103	-3.61157	down
MEDP101	P-Coumaric Acid	Benzene and substituted derivatives	347550	274570	291250	140810	167750	125800	1.18521	0.475558	-1.07231	down
MEDP123	Acetylcholine Chloride	Tryptamine, Choline, pigment	794290	658880	714940	367540	314950	313880	1.21681	0.459557	-1.12168	down
MEDP125	Choline	Tryptamine, Choline, pigment	379820	336390	353320	153080	78078	110050	1.17873	0.319026	-1.64825	down
MEDP149	2'-Deoxyadenosine-5'-Monophosphate	Nucleotide metabolomics	1847400	1164300	1371300	583260	408300	343460	1.17081	0.30459	-1.71506	down
MEDP151	2-Hydroxy-6-Aminopurine	Nucleotide metabolomics	565030	383660	485270	270900	246670	180010	1.1208	0.486471	-1.03957	down
MEDP155	5-Methylcytosine	Nucleotide metabolomics	44865	46417	53854	23075	22582	24505	1.22169	0.483422	-1.04864	down
MEDP160	Adenosine	Nucleotide metabolomics	48838000	39602000	41050000	12080000	9893200	9566000	1.22805	0.243565	-2.03762	down
MEDP176	Thymidine	Nucleotide metabolomics	80406	51924	61162	24014	24498	17160	1.17743	0.339404	-1.55892	down
MEDP177	Thymine	Nucleotide metabolomics	184560	157780	166930	88152	80010	70141	1.21169	0.467931	-1.09563	down
MEDP178	Uracil	Nucleotide metabolomics	764380	457070	649280	92319	42664	46347	1.20498	0.0969301	-3.36691	down
MEDP212	N-Acetyl-5-Hydroxytryptamine	Tryptamine, Choline, pigment	81330	53383	58589	41977	31369	20386	1.03454	0.484899	-1.04424	down
MEDP244	All-Trans-13,14-Dihydroretinol	CoOthersEnzyme Factor & vitamin	187170	184150	181370	44855	40170	39132	1.23788	0.224641	-2.1543	down
MEDP250	Riboflavin	CoOthersEnzyme Factor & vitamin	423440	314480	352230	201890	150090	159000	1.1772	0.468724	-1.09319	down
MEDP251	Trigonelline	CoOthersEnzyme Factor & vitamin	137560	116660	97859	32221	27125	38237	1.21362	0.277162	-1.8512	down
MEDP276	Indole-3-Carboxaldehyde	Indole And Its Derivatives	22733	18447	8564	57702	39789	42787	1.06873	2.82	1.49569	up
MEDP286	2-Aminoethanesulfinic Acid	Organic Acid And Its Derivatives	169900	245730	241970	70610	49463	36747	1.18566	0.238473	-2.0681	down
MEDP296	4-Guanidinobutyric Acid	Organic Acid And Its Derivatives	13826000	12401000	11803000	5332400	4205800	4853800	1.22373	0.378438	-1.40187	down
MEDP297	5-Aminovaleric Acid	Organic Acid And Its Derivatives	152690	166140	149940	23192	17835	18836	1.23646	0.127702	-2.96914	down
MEDP298	6-Aminocaproic Acid	Organic Acid And Its Derivatives	15986000	12778000	11937000	8606500	5619600	5456600	1.12712	0.483593	-1.04814	down
MEDP313	Guanidineacetic Acid	Organic Acid And Its Derivatives	144550	115460	108110	20501	26748	16531	1.21658	0.173259	-2.529	down
MEDP316	Homovanillic Acid	Organic Acid And Its Derivatives	6297700	4668900	5582000	3090400	2362500	2139300	1.16613	0.458782	-1.12412	down
MEDP325	Maleic Acid	Organic Acid And Its Derivatives	4521300	4160600	4049700	1857800	1672700	1488300	1.22505	0.3942	-1.343	down
MEDP336	Lysopc 14:0	Lipids_Glycerophospholipids	31807000	26347000	26482000	5012500	3559100	3870700	1.23084	0.14701	-2.76602	down
MEDP367	γ-Aminobutyric Acid	Organic Acid And Its Derivatives	241520	244170	247200	93975	87858	72426	1.22584	0.346927	-1.5273	down
MEDP375	Deoxyadenosine	Nucleotide metabolomics	856100	762350	803630	475150	351360	315960	1.1773	0.47169	-1.08409	down
MEDP405	3-Aminoisobutanoic Acid	Amino Acid metabolomics	289010	259770	231140	90375	102350	65210	1.19603	0.33072	-1.59632	down
MEDP437	Ergothioneine	Organic Acid And Its Derivatives	3490400	2993100	2644400	1231600	924020	834150	1.20322	0.327542	-1.61025	down
MEDP461	2-Methylguanosine	Nucleotide metabolomics	479430	363740	419120	145960	105160	133480	1.21357	0.304684	-1.71461	down
MEDP494	Lysopc 15:0	Lipids_Glycerophospholipids	12539000	10627000	11026000	2541500	1790300	2156400	1.22954	0.189758	-2.39777	down
MEDP507	2-Hydroxycinnamic acid	Benzene and substituted derivatives	1446800	1215600	1234000	703230	667740	533860	1.19157	0.488869	-1.03248	down
MEDP537	PAF C-16	Lipids_others	104830000	99699000	101380000	11846000	8734300	9360900	1.23631	0.0978762	-3.3529	down
MEDP538	LTD4 [5S-hydroxy-6R-(S-cysteinylglycinyl)-7E,9E,11Z,14Z-eicosatetraenoic acid]	Lipids_Fatty Acids	23900000	22004000	22244000	6273800	4637000	5399600	1.23106	0.239338	-2.06288	down
MEDP575	5-amino-1-[3,4-dihydroxy-5-(hydroxymethyl)oxolan-2-yl]imidazole-4-carboxamide	Nucleotide metabolomics	101230	100160	91165	23242	28861	24581	1.23144	0.262118	-1.93171	down
MEDP577	Isobutyryl carnitine (CAR C4:0)	Carnitine	1227500	1030300	1034700	581290	343930	354770	1.16497	0.388759	-1.36305	down
MEDP601	Spermidine	Amines	4531200	2734000	2474600	280760	139590	89969	1.2024	0.0523952	-4.25442	down
MEDP611	N-Acetyl-L-Histidine	Organic Acid And Its Derivatives	31450000	30675000	28082000	12944000	12684000	12297000	1.23552	0.420422	-1.25009	down
MEDP618	2-Methylbutyroylcarnitine (CAR C5:0)	Carnitine	833200	670620	714810	401770	302670	285790	1.1865	0.446325	-1.16383	down
MEDP631	Dimethyl fumarate	Aldehydes, ketones, esters	309630	649610	586500	177650	145900	249620	1.0781	0.370806	-1.43126	down
MEDP664	L- tyrosine methyl ester	Amino Acid metabolomics	293030	266440	267240	73036	86728	70252	1.2303	0.278231	-1.84565	down
MEDP691	Ethylparaben	Benzene and substituted derivatives	494820	394300	380790	225410	170190	154030	1.17683	0.43281	-1.20819	down
MEDP849	Nα-Acetyl-L-glutamine	Amino Acid metabolomics	306000	296220	307040	66160	144500	85004	1.14911	0.32517	-1.62073	down
MEDP853	Choline chloride	Tryptamine, Choline, pigment	26039000	23388000	21680000	6777200	6545500	6073600	1.23399	0.272776	-1.87421	down
MEDP859	glycylphenylalanine	Amino Acid metabolomics	554040	638130	569900	271080	300970	246460	1.2179	0.464516	-1.1062	down
MEDP877	Cytidine 5'-Diphosphocholine	Nucleotide metabolomics	194850	146660	120390	66190	59209	80630	1.14658	0.446047	-1.16473	down
MEDP883	2,4-Dihydroxypteridine	Pteridines and derivatives	51672	30237	34958	21167	20548	13873	1.07142	0.475652	-1.07202	down
MWS0555-N	Homo-Gamma-Linolenic Acid(C2-:3)	Lipids_Fatty Acids	45260000	36576000	36872000	22006000	19198000	18080000	1.19891	0.49941	-1.0017	down
MWS0965-N	24,25-Dihydrolanosterol	Lipids_others	30170	25405	21385	8219.9	5049	3747.3	1.18122	0.221104	-2.1772	down
MWS0970-P	biliverdin	Tryptamine, Choline, pigment	10194	6464.9	5120.9	2535.8	1746.1	1206.8	1.14069	0.252009	-1.98845	down
Whmp0305	Oxypurinol	Nucleotide metabolomics	6248700	5511700	5421400	797180	689410	578570	1.2337	0.120195	-3.05656	down
Wmjn0167	Uridine 5'-monophosphate	Nucleotide metabolomics	2923000	2672400	2897200	1049500	867440	657790	1.20751	0.303173	-1.72179	down
Wmjn1628	Riboflavin-5'-monophosphate	Nucleotide metabolomics	100090	80165	82176	28392	25359	27964	1.22866	0.311377	-1.68327	down
Wmjp0053	2-Aminomethylpyrimidine (hydrochloride)	Nucleotide metabolomics	520400	522120	474390	251440	213430	239860	1.22822	0.464583	-1.10599	down
Wmjp0774	ALANYL-dl-LEUCINE	Amino Acid metabolomics	150670	136930	118310	50835	42575	57789	1.21137	0.372494	-1.42471	down
Wmjp0785	Threoninyl-Phenylalanine	Amino Acid metabolomics	265920	217880	142850	41563	32162	54418	1.19035	0.204489	-2.28991	down
Wmjp0958	L-Valyl-L-phenylalanine	Amino Acid metabolomics	174360	206790	225670	74061	56796	74361	1.21389	0.338186	-1.56411	down

## Sheet: S3-1 vs S3-0
Index	Compounds	Class	S3-0a	S3-0b	S3-0c	S3-1a	S3-1b	S3-1c	VIP	Fold_Change	Log2FC	Type
Cmhp053	CAR C12:0	Carnitine	12548	12490	12690	66674	53673	63161	1.28457	4.86397	2.28214	up
Cmhp066	CAR C14:0	Carnitine	44257	53505	44251	301350	303260	275860	1.28453	6.19993	2.63225	up
Cmhp074	CAR C14-OH(3)	Carnitine	10475	9125.2	9045.4	34365	38666	39426	1.28399	3.9258	1.97299	up
Cmhp077	CAR C16:1	Carnitine	28368	24663	30409	169800	179590	185250	1.28603	6.40748	2.67976	up
Cmhp087	CAR C15:DC*	Carnitine	9	9	9	85260	78387	70571	1.2887	8674.74	13.0826	up
Cmhp091	CAR C18:2	Carnitine	9665.8	13883	11990	59325	55937	44148	1.26583	4.48552	2.16528	up
Cmhp092	CAR C18:1	Carnitine	106320	121730	119850	844860	725730	652770	1.28248	6.3908	2.676	up
Cmhp101	CAR C17:1:DC*	Carnitine	6386.3	5636.1	6583.6	54125	56945	54504	1.28768	8.89896	3.15364	up
Cmhp102	CAR C18:1-OH(3)	Carnitine	8256.9	5870	7867.3	60638	59254	40237	1.26946	7.28051	2.86404	up
Cmhp106	CAR ph-C14	Carnitine	21447	28302	16716	62047	59451	52142	1.22304	2.6125	1.38543	up
Cmmn9102	2-hydroxyhexadecanoic acid	Lipids_Fatty Acids	290900	391880	315200	1221800	1092700	1048900	1.27073	3.37021	1.75284	up
Cmzn001	LysoPE 16:1	Lipids_Glycerophospholipids	86872	70135	56790	711020	664190	803400	1.28099	10.1901	3.34909	up
Cmzn002	LysoPE 16:1 (2n isomer)	Lipids_Glycerophospholipids	80979	62852	61279	707430	691290	791620	1.28509	10.6789	3.41669	up
Cmzn007	LysoPE 18:2	Lipids_Glycerophospholipids	32258	20171	13659	288470	285720	326240	1.26727	13.6247	3.76815	up
Cmzn009	LysoPE 18:1	Lipids_Glycerophospholipids	35195	32822	5760.7	83043	100950	122420	1.04821	4.15319	2.05422	up
Cmzp003	LysoPC 16:1	Lipids_Glycerophospholipids	1881900	2640400	2716600	4665200	4792200	5112000	1.21982	2.01265	1.0091	up
MEDN027	3-N-Methyl-L-Histidine	Amino Acid metabolomics	25104	45760	34191	244340	212340	264120	1.26597	6.86117	2.77845	up
MEDN028	4-Hydroxy-L-Glutamic Acid	Amino Acid metabolomics	38467	26666	25480	93121	82736	64986	1.2189	2.65793	1.4103	up
MEDN056	N-Acetyl-L-Leucine	Amino Acid metabolomics	353170	444850	374620	101300	99546	96740	1.28272	0.253774	-1.97838	down
MEDN138	1-Methylhistidine	Amino Acid metabolomics	13715	26662	20984	116730	142280	183820	1.25494	7.2168	2.85136	up
MEDN140	2,6-Dihydroxypurine	Nucleotide metabolomics	1701500	1650200	1695900	876310	881870	573630	1.21545	0.461964	-1.11415	down
MEDN152	Adenosine 5'-Diphosphate	Nucleotide metabolomics	3564400	4600900	3000600	8002000	9417900	8693300	1.23131	2.33866	1.22568	up
MEDN158	Deoxyguanosine	Nucleotide metabolomics	1697200	2173200	2036400	441350	440700	422780	1.2831	0.220903	-2.17851	down
MEDN160	Guanosine	Nucleotide metabolomics	24884000	29220000	23373000	57294000	45514000	53215000	1.24329	2.0138	1.00992	up
MEDN163	Hypoxanthine	Nucleotide metabolomics	5040100	4285300	5342700	2352800	2479700	1890800	1.24521	0.458362	-1.12544	down
MEDN283	2-Hydroxybutanoic Acid	Organic Acid And Its Derivatives	769270	889500	777730	381450	348840	302620	1.26795	0.423932	-1.2381	down
MEDN285	2-Methylsuccinic Acid	Organic Acid And Its Derivatives	4173500	4825400	3946800	43943000	43870000	43237000	1.28696	10.1231	3.33957	up
MEDN314	Glutaric Acid	Organic Acid And Its Derivatives	4375200	4790000	4130800	49031000	42261000	43663000	1.28676	10.15	3.34341	up
MEDN325	L-Lactic Acid	Organic Acid And Its Derivatives	872900	855050	835800	377960	388100	350620	1.28543	0.435565	-1.19904	down
MEDN350	(±)15-HETE [(±)15-hydroxy-5Z,8Z,11Z,13E-eicosatetraenoic acid]	Oxidized lipid	8980.5	7864.4	7719.2	58232	57278	66309	1.28665	7.40182	2.88788	up
MEDN351	12-Hete	Lipids_Fatty Acids	786440	966150	828540	1977300	2005100	1724200	1.26286	2.21089	1.14463	up
MEDN373	LipoxinA4 [5S,6R,15S-trihydroxy-7E,9E,11Z,13E-eicosatetraenoic acid]	Oxidized lipid	9	9	9	16768	18439	16216	1.28878	1904.56	10.8952	up
MEDN413	Ethylmalonate	Organic Acid And Its Derivatives	30176	27223	19076	312280	303160	274590	1.28002	11.6382	3.54079	up
MEDN455	Guanine	Nucleotide metabolomics	42893	36711	27885	20789	12428	15034	1.16039	0.448892	-1.15556	down
MEDN469	Citraconic Acid	Organic Acid And Its Derivatives	463840	480110	420250	201990	190140	149580	1.26196	0.39709	-1.33246	down
MEDN491	9-HOTrE [9S-hydroxy-10E,12Z,15Z-octadecatrienoic acid]	Oxidized lipid	8355.1	8930.2	10451	28752	22993	29528	1.26601	2.9302	1.551	up
MEDN528	(3-Methoxy-4-hydroxyphenyl)ethylene glycol sulfate	Organic Acid And Its Derivatives	28715	39643	33471	13217	8049.9	4385.4	1.17813	0.251915	-1.98899	down
MEDN536	estrone 3-sulfate	Hormones	4700.7	6237.6	4581	22806	18760	16281	1.25929	3.72742	1.89818	up
MEDN537	ADP-ribose	Nucleotide metabolomics	795030	527170	628950	2512200	2332700	2437000	1.26892	3.73211	1.89999	up
MEDN553	2-Methylbenzoic acid	Benzene and substituted derivatives	682520	693430	737290	353620	295000	251260	1.25662	0.42583	-1.23165	down
MEDN579	N-lactoyl-phenylalanine	Amino Acid metabolomics	149900	192560	174000	40316	35091	31274	1.27918	0.206562	-2.27535	down
MEDN624	5'-Adenylyl sulfate (APS)	Nucleotide metabolomics	6066800	6511100	4937400	13794000	13287000	12420000	1.25892	2.25523	1.17327	up
MEDN669	5-oxoETE [5-oxo-6E,8Z,11Z,14Z-eicosatetraenoic acid]	Oxidized lipid	14882	12365	10500	178610	161860	187270	1.28487	13.981	3.80539	up
MEDN741	Methanesulfonic acid	Others	734910	792700	710280	1869700	1578700	1624700	1.27365	2.26691	1.18073	up
MEDN750	(±)12-HEPE [(±)-12-hydroxy-5Z,8Z,10E,14Z,17Z-eicosapentaenoic acid]	Oxidized lipid	113180	151300	116450	365110	351750	295800	1.2542	2.65839	1.41055	up
MEDN751	(±)12-HETE [(±)12-hydroxy-5Z,8Z,10E,14Z-eicosatetraenoic acid]	Oxidized lipid	1239300	1473700	1317600	3270500	3123000	2795800	1.26974	2.27988	1.18896	up
MEDN753	(±)16-HETE [(±)16-hydroxy-5Z,8Z,11Z,14Z-eicosatetraenoic acid]	Oxidized lipid	7269.7	8461.3	9965	19954	20345	15371	1.2209	2.16649	1.11536	up
MEDN756	(±)18-HEPE [(±)-18-hydroxy-5Z,8Z,11Z,14Z,16E-eicosapentaenoic acid]	Oxidized lipid	72186	87863	70496	274350	261320	221660	1.27135	3.28496	1.71587	up
MEDN758	(±)4-HDHA [(±)4-hydroxy-5E,7Z,10Z,13Z,16Z,19Z-docosahexaenoic acid]	Oxidized lipid	11703	8674.5	8447.2	90653	75300	82207	1.28162	8.60928	3.10589	up
MEDN759	(±)5-HEPE [(±)-5-hydroxy-6E,8Z,11Z,14Z,17Z-eicosapentaenoic acid]	Oxidized lipid	4841.8	8885	7678	35471	30491	29983	1.24914	4.48241	2.16427	up
MEDN760	(±)5-HETE [(±)5-hydroxy-6E,8Z,11Z,14Z-eicosatetraenoic acid]	Oxidized lipid	92359	105960	100880	480610	453860	502880	1.28631	4.80399	2.26423	up
MEDN761	(±)7-HDHA [(±)7-hydroxy-4Z,8E,10Z,13Z,16Z,19Z-docosahexaenoic acid]	Oxidized lipid	3716.1	3603	3139.8	24765	22376	22877	1.28622	6.69459	2.74299	up
MEDN763	(±)9-HETE [(±)-9-hydroxy-5Z,7E,11Z,14Z-eicosatetraenoic acid]	Oxidized lipid	43044	46855	46194	131460	138500	141740	1.28653	3.02514	1.597	up
MEDN765	11,12-EET [(±)11,(12)-epoxy-5Z,8Z,14Z-eicosatrienoic acid]	Oxidized lipid	192550	194460	179340	1073500	1020800	987570	1.28754	5.44164	2.44404	up
MEDN768	13-oxoODE [13-oxo-9Z,11E-octadecadienoic acid]	Oxidized lipid	48353	47190	42853	233870	196920	229540	1.28453	4.77131	2.25438	up
MEDN769	14(S)-HDHA [14S-hydroxy-4Z,7Z,10Z,12E,16Z,19Z-docosahexaenoic acid]	Oxidized lipid	13155	15750	9899.2	86003	82755	81911	1.27529	6.45984	2.6915	up
MEDN771	15-oxoETE [15-oxo-5Z,8Z,11Z,13E-eicosatetraenoic acid]	Oxidized lipid	80794	63221	57279	985070	877040	1099800	1.28427	14.7143	3.87915	up
MEDN776	5(S),15(S)-DiHETE [5S,15S-dihydroxy-6E,8Z,10Z,13E-eicosatetraenoic acid]	Oxidized lipid	9	9	9	9998.3	9363	6622.6	1.28767	962.367	9.91044	up
MEDN778	5,6-EET [(±)5,6-epoxy-8Z,11Z,14Z-eicosatrienoic acid]	Oxidized lipid	5265.5	4264.7	2856.5	38819	31673	32836	1.26917	8.34185	3.06037	up
MEDN779	5-HETrE [5S-hydroxy-6E,8Z,11Z-eicosatrienoic acid]	Oxidized lipid	17117	17435	17369	93808	86597	94041	1.28826	5.28584	2.40213	up
MEDN782	8,9-EET [(±)8,9-epoxy-5Z,11Z,14Z-eicosatrienoic acid]	Oxidized lipid	17996	16877	14449	111670	94916	126600	1.28168	6.75532	2.75602	up
MEDN791	PGD1 [9α,15S-dihydroxy-11-oxo-prost-13E-en-1-oic acid]	Oxidized lipid	21443	26329	22738	83514	78411	64894	1.26969	3.21683	1.68564	up
MEDN792	PGE1 [9-oxo-11α,15S-dihydroxy-prost-13E-en-1-oic acid]	Oxidized lipid	75036	93233	74784	245210	254560	225460	1.27393	2.98383	1.57717	up
MEDN793	PGE2 [9-oxo-11α,15S-dihydroxy-prosta-5Z,13E-dien-1-oic acid]	Oxidized lipid	615390	702670	624090	1917200	1988700	1708500	1.2791	2.89082	1.53148	up
MEDP011	L-Lysine	Amino Acid metabolomics	18326000	10290000	9955000	34489000	34037000	38549000	1.20644	2.77605	1.47303	up
MEDP035	5-Hydroxy-L-Tryptophan	Amino Acid metabolomics	24607	28775	26694	172530	153380	170100	1.28611	6.19424	2.63093	up
MEDP051	L-Cystathionine	Amino Acid metabolomics	25189000	24909000	27030000	10639000	12253000	12325000	1.27588	0.456605	-1.13098	down
MEDP054	L-Glutamine	Amino Acid metabolomics	15087000	8819600	10547000	32296000	28391000	33139000	1.22865	2.72326	1.44533	up
MEDP061	N,N-Dimethylglycine	Amino Acid metabolomics	1395500	1560500	1174800	3041200	2931600	2484300	1.23682	2.04733	1.03374	up
MEDP082	S-Sulfo-L-Cysteine	Amino Acid metabolomics	99208	111300	115440	29297	30790	20819	1.26873	0.248218	-2.01032	down
MEDP115	1,4-Dihydro-1-Methyl-4-Oxo-3-Pyridinecarboxamide	Pyridine And Pyridine Derivatives	220680	196840	227760	426610	484200	386440	1.25627	2.01037	1.00746	up
MEDP155	5-Methylcytosine	Nucleotide metabolomics	307020	418260	280190	79259	90403	60076	1.25747	0.228488	-2.12981	down
MEDP158	8-Hydroxyguanosine	Nucleotide metabolomics	54713	74057	45863	123580	116640	169920	1.18777	2.34858	1.23179	up
MEDP176	Thymidine	Nucleotide metabolomics	373850	517040	440860	69907	61360	41838	1.27127	0.129983	-2.9436	down
MEDP177	Thymine	Nucleotide metabolomics	724260	741630	720740	186910	168820	172270	1.28782	0.241467	-2.0501	down
MEDP276	Indole-3-Carboxaldehyde	Indole And Its Derivatives	16500	14628	14040	46393	30351	28841	1.20198	2.33761	1.22503	up
MEDP357	Urocanic Acid	Organic Acid And Its Derivatives	82730	99777	96915	242280	222760	258530	1.27432	2.58952	1.37269	up
MEDP403	Deoxycytidine	Nucleotide metabolomics	3345200	4341400	4704700	911730	1032500	724950	1.26767	0.215408	-2.21486	down
MEDP430	2-Aminoadipic Acid	Organic Acid And Its Derivatives	430840	477900	485430	4766800	4889600	4412000	1.28743	10.0909	3.33498	up
MEDP529	Indole-3-acetamide	Indole And Its Derivatives	9	9	9	126460	136040	138030	1.28892	14834.4	13.8567	up
MEDP550	18-Hydroxycorticosterone	Hormones	95645	83207	67320	986320	813480	754280	1.28072	10.3752	3.37507	up
MEDP575	5-amino-1-[3,4-dihydroxy-5-(hydroxymethyl)oxolan-2-yl]imidazole-4-carboxamide	Nucleotide metabolomics	54495	55942	61816	92804	137430	114500	1.21678	2.00132	1.00095	up
MEDP868	N-methylalanine	Amino Acid metabolomics	582430	663760	593860	1239300	1257500	1245600	1.27996	2.03386	1.02422	up
MEDP874	tryptophan betaine	Amino Acid metabolomics	49417	51836	48501	174610	146990	126950	1.26848	2.99525	1.58267	up
MEDP878	N-Methyl-L-Glutamate	Amino Acid metabolomics	165580	178710	173870	1968000	1964400	1709800	1.28726	10.8889	3.44479	up
MWS0970-P	biliverdin	Tryptamine, Choline, pigment	9257.4	15717	10458	3372.8	3935.7	6070.6	1.15777	0.377595	-1.40509	down
MWS2383-N	2-hydroxystearate	Lipids_Fatty Acids	44705	55372	53002	116170	122540	127100	1.27241	2.38968	1.25682	up
Whmp0305	Oxypurinol	Nucleotide metabolomics	2351000	2437900	2356400	1254800	1179500	990680	1.2672	0.479333	-1.0609	down

## Sheet: S3-3 vs S3-0
Index	Compounds	Class	S3-0a	S3-0b	S3-0c	S3-3a	S3-3b	S3-3c	VIP	Fold_Change	Log2FC	Type
Cmhp015	CAR ph-C1	Carnitine	163200	160030	147320	303400	334430	327470	1.23629	2.05143	1.03663	up
Cmhp048	CAR C10-OH	Carnitine	14439	15814	10354	32281	32653	40538	1.19196	2.59738	1.37706	up
Cmhp053	CAR C12:0	Carnitine	12548	12490	12690	45590	47053	48686	1.24385	3.746	1.90535	up
Cmhp066	CAR C14:0	Carnitine	44257	53505	44251	214900	225840	221840	1.24038	4.66563	2.22207	up
Cmhp074	CAR C14-OH(3)	Carnitine	10475	9125.2	9045.4	43311	37713	45495	1.23866	4.4167	2.14297	up
Cmhp077	CAR C16:1	Carnitine	28368	24663	30409	122490	131470	103480	1.23305	4.2838	2.09889	up
Cmhp087	CAR C15:DC*	Carnitine	9	9	9	65940	67813	74521	1.24431	7713.85	12.9132	up
Cmhp091	CAR C18:2	Carnitine	9665.8	13883	11990	45086	42096	34686	1.21668	3.42915	1.77785	up
Cmhp092	CAR C18:1	Carnitine	106320	121730	119850	453670	440200	530600	1.23812	4.09448	2.03368	up
Cmhp101	CAR C17:1:DC*	Carnitine	6386.3	5636.1	6583.6	48437	50249	53262	1.24247	8.16661	3.02974	up
Cmhp102	CAR C18:1-OH(3)	Carnitine	8256.9	5870	7867.3	57159	47623	42356	1.23064	6.68985	2.74197	up
Cmhp106	CAR ph-C14	Carnitine	21447	28302	16716	106500	107760	104590	1.22344	4.79726	2.26221	up
Cmhp113	CAR C21:2	Carnitine	103940	138030	112040	54940	53226	53564	1.2146	0.456852	-1.1302	down
Cmhp122	CAR C22:2	Carnitine	109080	108630	97435	51565	59373	41166	1.19034	0.482648	-1.05096	down
Cmmn9102	2-hydroxyhexadecanoic acid	Lipids_Fatty Acids	290900	391880	315200	746920	727720	778540	1.21567	2.25774	1.17488	up
Cmzn001	LysoPE 16:1	Lipids_Glycerophospholipids	86872	70135	56790	325250	395060	344800	1.2281	4.98188	2.31669	up
Cmzn002	LysoPE 16:1 (2n isomer)	Lipids_Glycerophospholipids	80979	62852	61279	323430	387340	371900	1.2352	5.27848	2.40012	up
Cmzn007	LysoPE 18:2	Lipids_Glycerophospholipids	32258	20171	13659	93365	130540	90710	1.17899	4.76055	2.25113	up
Cmzn023	LysoPE 22:5(2n isomer1)	Lipids_Glycerophospholipids	10821000	13529000	11382000	5153400	5527800	4630200	1.21983	0.428507	-1.22261	down
Cmzn024	LysoPE 22:5(2n isomer2)	Lipids_Glycerophospholipids	10680000	13190000	11320000	5406100	5417400	4730300	1.22253	0.441995	-1.1779	down
Cmzn025	LysoPE 22:5(2n isomer3)	Lipids_Glycerophospholipids	9920900	13100000	11618000	5170400	5462300	4906400	1.21626	0.448603	-1.15649	down
Cmzn027	LysoPE 22:4(2n isomer1)	Lipids_Glycerophospholipids	149700	166840	157000	75946	73676	67983	1.23613	0.459528	-1.12177	down
Cmzn037	PI 18:1	Lipids_Glycerophospholipids	136280	167180	147300	53481	54112	42085	1.2244	0.332057	-1.5905	down
Cmzp002	LysoPC 14:0 (2n isomer)	Lipids_Glycerophospholipids	23744000	28713000	23659000	12274000	12855000	12179000	1.22243	0.490147	-1.02871	down
Cmzp033	LysoPC 22:4	Lipids_Glycerophospholipids	748170	857330	664400	250610	305870	277930	1.22191	0.367598	-1.4438	down
Cmzp034	LysoPC 22:4 (2n isomer1)	Lipids_Glycerophospholipids	736450	867250	721030	259120	275600	254240	1.23536	0.339377	-1.55904	down
MEDN004	L-Cystine	Amino Acid metabolomics	18209	22689	27889	68679	58343	59310	1.20116	2.70883	1.43767	up
MEDN010	L-Citrulline	Amino Acid metabolomics	658970	537870	487650	236950	242990	166200	1.18753	0.383582	-1.38239	down
MEDN017	L-Pyroglutamic Acid	Amino Acid metabolomics	19790	11785	35553	121220	138970	116510	1.17003	5.61167	2.48843	up
MEDN027	3-N-Methyl-L-Histidine	Amino Acid metabolomics	25104	45760	34191	153630	176980	161730	1.21379	4.6865	2.22851	up
MEDN028	4-Hydroxy-L-Glutamic Acid	Amino Acid metabolomics	38467	26666	25480	73248	76970	63706	1.18368	2.36085	1.23931	up
MEDN042	L-Asparagine Anhydrous	Amino Acid metabolomics	35789	50094	41721	103640	97231	89966	1.20605	2.27922	1.18854	up
MEDN056	N-Acetyl-L-Leucine	Amino Acid metabolomics	353170	444850	374620	153600	143850	150260	1.23008	0.381797	-1.38912	down
MEDN138	1-Methylhistidine	Amino Acid metabolomics	13715	26662	20984	75323	109070	94675	1.19567	4.54797	2.18522	up
MEDN143	3'-Aenylic Acid	Nucleotide metabolomics	1690600	2229800	1951300	5332200	5442800	6409700	1.22452	2.9267	1.54927	up
MEDN158	Deoxyguanosine	Nucleotide metabolomics	1697200	2173200	2036400	819960	844340	958460	1.21536	0.444024	-1.17129	down
MEDN160	Guanosine	Nucleotide metabolomics	24884000	29220000	23373000	73557000	77164000	74043000	1.2351	2.90104	1.53657	up
MEDN162	Guanosine Monophosphate	Nucleotide metabolomics	602130	411860	512330	1624000	1676900	1299800	1.20742	3.01424	1.5918	up
MEDN227	D-Glucose 6-Phosphate	Carbohydrate metabolomics	35865000	37471000	34130000	13310000	14245000	15085000	1.23764	0.396777	-1.3336	down
MEDN237	D-Glucoronic Acid	Carbohydrate metabolomics	85072	65302	82519	27505	36382	24487	1.19474	0.379462	-1.39797	down
MEDN285	2-Methylsuccinic Acid	Organic Acid And Its Derivatives	4173500	4825400	3946800	23004000	23464000	23754000	1.24165	5.42435	2.43945	up
MEDN314	Glutaric Acid	Organic Acid And Its Derivatives	4375200	4790000	4130800	23980000	24712000	23178000	1.24267	5.40539	2.4344	up
MEDN350	(±)15-HETE [(±)15-hydroxy-5Z,8Z,11Z,13E-eicosatetraenoic acid]	Oxidized lipid	8980.5	7864.4	7719.2	20770	20596	19446	1.23641	2.47565	1.3078	up
MEDN351	12-Hete	Lipids_Fatty Acids	786440	966150	828540	2046100	2097800	1944200	1.23034	2.3587	1.23799	up
MEDN373	LipoxinA4 [5S,6R,15S-trihydroxy-7E,9E,11Z,13E-eicosatetraenoic acid]	Oxidized lipid	9	9	9	4291.4	4465.3	5897.3	1.24384	542.741	9.08412	up
MEDN413	Ethylmalonate	Organic Acid And Its Derivatives	30176	27223	19076	148030	143690	152880	1.23037	5.81366	2.53945	up
MEDN419	Uridine 5-Monophosphate	Nucleotide metabolomics	4119500	4736000	4118600	12653000	12292000	11782000	1.23867	2.83079	1.50121	up
MEDN463	D-Fructose 6-Phosphate-Disodium Salt	Carbohydrate metabolomics	16178000	17190000	16373000	6469200	7043400	7092500	1.24005	0.414248	-1.27143	down
MEDN480	Dl-Glyceraldehyde3-Phosphate	Organic Acid And Its Derivatives	7196300	8217200	7660500	17040000	22802000	18623000	1.21923	2.5338	1.34131	up
MEDN485	D-Fructose-1,6-Biphosphate-Trisodium Salt	Carbohydrate metabolomics	4734500	4861500	4621800	10984000	13614000	10400000	1.22296	2.46156	1.29957	up
MEDN491	9-HOTrE [9S-hydroxy-10E,12Z,15Z-octadecatrienoic acid]	Oxidized lipid	8355.1	8930.2	10451	18425	21416	16512	1.19505	2.03174	1.02272	up
MEDN496	N-Acetylmethionine	Amino Acid metabolomics	32395	41838	33611	96258	98129	104130	1.22904	2.76804	1.46887	up
MEDN528	(3-Methoxy-4-hydroxyphenyl)ethylene glycol sulfate	Organic Acid And Its Derivatives	28715	39643	33471	8831.3	10525	3116.7	1.12321	0.220694	-2.17988	down
MEDN533	Xanthosine	Nucleotide metabolomics	1725100	1867800	1803700	489840	479890	448690	1.24278	0.262836	-1.92777	down
MEDN537	ADP-ribose	Nucleotide metabolomics	795030	527170	628950	77326	108580	107590	1.22592	0.150422	-2.73291	down
MEDN553	2-Methylbenzoic acid	Benzene and substituted derivatives	682520	693430	737290	327190	316440	355110	1.23681	0.472611	-1.08128	down
MEDN669	5-oxoETE [5-oxo-6E,8Z,11Z,14Z-eicosatetraenoic acid]	Oxidized lipid	14882	12365	10500	54832	52502	56700	1.23328	4.34562	2.11956	up
MEDN741	Methanesulfonic acid	Others	734910	792700	710280	3242800	3423600	3422700	1.24317	4.50831	2.17259	up
MEDN750	(±)12-HEPE [(±)-12-hydroxy-5Z,8Z,10E,14Z,17Z-eicosapentaenoic acid]	Oxidized lipid	113180	151300	116450	357200	363190	363770	1.22638	2.84609	1.50898	up
MEDN751	(±)12-HETE [(±)12-hydroxy-5Z,8Z,10E,14Z-eicosatetraenoic acid]	Oxidized lipid	1239300	1473700	1317600	3221200	3137600	3200500	1.23597	2.37168	1.24591	up
MEDN753	(±)16-HETE [(±)16-hydroxy-5Z,8Z,11Z,14Z-eicosatetraenoic acid]	Oxidized lipid	7269.7	8461.3	9965	22891	18065	20537	1.20292	2.3931	1.25888	up
MEDN756	(±)18-HEPE [(±)-18-hydroxy-5Z,8Z,11Z,14Z,16E-eicosapentaenoic acid]	Oxidized lipid	72186	87863	70496	240850	244880	241760	1.23593	3.15552	1.65788	up
MEDN758	(±)4-HDHA [(±)4-hydroxy-5E,7Z,10Z,13Z,16Z,19Z-docosahexaenoic acid]	Oxidized lipid	11703	8674.5	8447.2	38572	45014	46944	1.22972	4.52841	2.179	up
MEDN759	(±)5-HEPE [(±)-5-hydroxy-6E,8Z,11Z,14Z,17Z-eicosapentaenoic acid]	Oxidized lipid	4841.8	8885	7678	22340	20895	20962	1.18253	2.99919	1.58457	up
MEDN760	(±)5-HETE [(±)5-hydroxy-6E,8Z,11Z,14Z-eicosatetraenoic acid]	Oxidized lipid	92359	105960	100880	275470	281120	273810	1.24029	2.77541	1.4727	up
MEDN761	(±)7-HDHA [(±)7-hydroxy-4Z,8E,10Z,13Z,16Z,19Z-docosahexaenoic acid]	Oxidized lipid	3716.1	3603	3139.8	15539	11675	14869	1.23153	4.02365	2.00851	up
MEDN763	(±)9-HETE [(±)-9-hydroxy-5Z,7E,11Z,14Z-eicosatetraenoic acid]	Oxidized lipid	43044	46855	46194	123300	116890	102210	1.23261	2.51593	1.33109	up
MEDN765	11,12-EET [(±)11,(12)-epoxy-5Z,8Z,14Z-eicosatrienoic acid]	Oxidized lipid	192550	194460	179340	423990	477680	468800	1.23859	2.41983	1.2749	up
MEDN768	13-oxoODE [13-oxo-9Z,11E-octadecadienoic acid]	Oxidized lipid	48353	47190	42853	95423	107940	95566	1.23233	2.15995	1.111	up
MEDN769	14(S)-HDHA [14S-hydroxy-4Z,7Z,10Z,12E,16Z,19Z-docosahexaenoic acid]	Oxidized lipid	13155	15750	9899.2	49617	54775	55774	1.22287	4.12754	2.04528	up
MEDN771	15-oxoETE [15-oxo-5Z,8Z,11Z,13E-eicosatetraenoic acid]	Oxidized lipid	80794	63221	57279	300080	337330	322650	1.23346	4.76944	2.25382	up
MEDN778	5,6-EET [(±)5,6-epoxy-8Z,11Z,14Z-eicosatrienoic acid]	Oxidized lipid	5265.5	4264.7	2856.5	12350	10511	12736	1.17724	2.87381	1.52296	up
MEDN779	5-HETrE [5S-hydroxy-6E,8Z,11Z-eicosatrienoic acid]	Oxidized lipid	17117	17435	17369	36906	34911	33367	1.23953	2.02585	1.01853	up
MEDN782	8,9-EET [(±)8,9-epoxy-5Z,11Z,14Z-eicosatrienoic acid]	Oxidized lipid	17996	16877	14449	33746	39590	36044	1.22127	2.21767	1.14905	up
MEDN822	Cysteine glutathione disulfide	Amino Acid metabolomics	690610	733550	762120	1510300	1616500	2070300	1.21248	2.37714	1.24923	up
MEDN832	D-Glucosamine 6-Phosphate	Carbohydrate metabolomics	1068700	1632800	900970	362410	376420	503830	1.15506	0.344947	-1.53555	down
MEDN844	Stachyose	Carbohydrate metabolomics	27949	33041	32054	13518	11757	12876	1.23115	0.410032	-1.28619	down
MEDP020	L-Methionine	Amino Acid metabolomics	7750000	7578700	7367200	18383000	19927000	17293000	1.23834	2.44991	1.29273	up
MEDP035	5-Hydroxy-L-Tryptophan	Amino Acid metabolomics	24607	28775	26694	125140	108550	139790	1.23698	4.66407	2.22159	up
MEDP051	L-Cystathionine	Amino Acid metabolomics	25189000	24909000	27030000	11871000	11819000	11920000	1.24207	0.4617	-1.11497	down
MEDP054	L-Glutamine	Amino Acid metabolomics	15087000	8819600	10547000	23884000	22649000	22980000	1.14051	2.01758	1.01263	up
MEDP061	N,N-Dimethylglycine	Amino Acid metabolomics	1395500	1560500	1174800	3265200	3498300	3209700	1.2225	2.41435	1.27164	up
MEDP062	N6-Acetyl-L-Lysine	Amino Acid metabolomics	149340	153630	131350	456970	468880	341350	1.2171	2.91766	1.54481	up
MEDP082	S-Sulfo-L-Cysteine	Amino Acid metabolomics	99208	111300	115440	44965	44449	52562	1.22656	0.435579	-1.19899	down
MEDP115	1,4-Dihydro-1-Methyl-4-Oxo-3-Pyridinecarboxamide	Pyridine And Pyridine Derivatives	220680	196840	227760	897190	657940	639820	1.22076	3.40155	1.76619	up
MEDP150	2'-Deoxyinosine	Nucleotide metabolomics	31069	41772	31439	90725	91329	95206	1.22159	2.6588	1.41078	up
MEDP155	5-Methylcytosine	Nucleotide metabolomics	307020	418260	280190	127070	154980	134960	1.18682	0.414741	-1.26972	down
MEDP156	5-Methyluridine	Nucleotide metabolomics	290170	327320	252250	678080	790060	700530	1.22293	2.49347	1.31815	up
MEDP158	8-Hydroxyguanosine	Nucleotide metabolomics	54713	74057	45863	176030	210780	221380	1.20976	3.48268	1.8002	up
MEDP176	Thymidine	Nucleotide metabolomics	373850	517040	440860	251440	185090	202400	1.17259	0.479767	-1.05959	down
MEDP177	Thymine	Nucleotide metabolomics	724260	741630	720740	389870	331720	343620	1.23279	0.487147	-1.03757	down
MEDP205	L-Carnitine	Carnitine	434270	511080	493190	1052600	1124000	1148500	1.23351	2.31144	1.20879	up
MEDP212	N-Acetyl-5-Hydroxytryptamine	Tryptamine, Choline, pigment	37929	62098	66153	114380	115360	117320	1.1291	2.08846	1.06244	up
MEDP336	Lysopc 14:0	Lipids_Glycerophospholipids	18078000	21219000	18075000	8799700	9200800	9038400	1.23039	0.471291	-1.08531	down
MEDP357	Urocanic Acid	Organic Acid And Its Derivatives	82730	99777	96915	25450	44906	36170	1.17224	0.381237	-1.39124	down
MEDP375	Deoxyadenosine	Nucleotide metabolomics	551770	674560	552080	2024700	1991600	1401000	1.20704	3.04615	1.60699	up
MEDP403	Deoxycytidine	Nucleotide metabolomics	3345200	4341400	4704700	1526100	1856700	1603200	1.20458	0.402379	-1.31337	down
MEDP430	2-Aminoadipic Acid	Organic Acid And Its Derivatives	430840	477900	485430	4922700	5110000	5050000	1.24355	10.8184	3.43542	up
MEDP523	DL-Carnitine	Carnitine	1803700	1940000	1768700	4300400	4366300	4399600	1.242	2.37035	1.2451	up
MEDP529	Indole-3-acetamide	Indole And Its Derivatives	9	9	9	116810	83262	96451	1.24401	10982.3	13.4229	up
MEDP550	18-Hydroxycorticosterone	Hormones	95645	83207	67320	338960	449470	369920	1.22759	4.70545	2.23433	up
MEDP583	Asp-Phe methyl ester	Others	1353600	1931700	1462000	3405800	3507600	3534800	1.20195	2.20087	1.13808	up
MEDP618	2-Methylbutyroylcarnitine (CAR C5:0)	Carnitine	140530	196130	191330	442480	406010	467940	1.20722	2.49329	1.31805	up
MEDP664	L- tyrosine methyl ester	Amino Acid metabolomics	123030	188660	135700	372980	338450	354080	1.19299	2.38161	1.25194	up
MEDP868	N-methylalanine	Amino Acid metabolomics	582430	663760	593860	1318300	1372700	1423300	1.23683	2.23597	1.1609	up
MEDP878	N-Methyl-L-Glutamate	Amino Acid metabolomics	165580	178710	173870	1928800	1897400	2057600	1.24394	11.3552	3.50528	up
Wmjp0774	ALANYL-dl-LEUCINE	Amino Acid metabolomics	48047	70677	57297	188730	177890	198660	1.22136	3.21143	1.68322	up

## Sheet: S3-5 vs S3-0
Index	Compounds	Class	S3-0a	S3-0b	S3-0c	S3-5a	S3-5b	S3-5c	VIP	Fold_Change	Log2FC	Type
Cmhp003	CAR C3:0	Carnitine	1289000	1540400	1380500	3302200	2829900	2919700	1.26057	2.15012	1.10442	up
Cmhp048	CAR C10-OH	Carnitine	14439	15814	10354	30624	27271	29491	1.21191	2.15199	1.10567	up
Cmhp053	CAR C12:0	Carnitine	12548	12490	12690	89431	78136	97116	1.27774	7.01556	2.81056	up
Cmhp066	CAR C14:0	Carnitine	44257	53505	44251	219690	184400	219250	1.27201	4.38932	2.134	up
Cmhp074	CAR C14-OH(3)	Carnitine	10475	9125.2	9045.4	35279	32595	32911	1.27649	3.51834	1.8149	up
Cmhp077	CAR C16:1	Carnitine	28368	24663	30409	119670	112330	131780	1.27356	4.35978	2.12426	up
Cmhp087	CAR C15:DC*	Carnitine	9	9	9	72486	55793	70520	1.28048	7362.93	12.8461	up
Cmhp091	CAR C18:2	Carnitine	9665.8	13883	11990	57260	50634	61552	1.26557	4.76792	2.25336	up
Cmhp092	CAR C18:1	Carnitine	106320	121730	119850	497430	538100	643490	1.27169	4.82616	2.27087	up
Cmhp101	CAR C17:1:DC*	Carnitine	6386.3	5636.1	6583.6	37264	32829	34019	1.27802	5.59561	2.4843	up
Cmhp102	CAR C18:1-OH(3)	Carnitine	8256.9	5870	7867.3	43776	35591	45348	1.26676	5.67036	2.50344	up
Cmhp106	CAR ph-C14	Carnitine	21447	28302	16716	90213	93264	85372	1.25114	4.04497	2.01613	up
Cmzn001	LysoPE 16:1	Lipids_Glycerophospholipids	86872	70135	56790	440520	407830	454360	1.2683	6.09321	2.6072	up
Cmzn002	LysoPE 16:1 (2n isomer)	Lipids_Glycerophospholipids	80979	62852	61279	454770	426810	470780	1.27445	6.59334	2.72101	up
Cmzn007	LysoPE 18:2	Lipids_Glycerophospholipids	32258	20171	13659	158680	140490	181490	1.24084	7.27303	2.86256	up
Cmzp033	LysoPC 22:4	Lipids_Glycerophospholipids	748170	857330	664400	390290	344810	388910	1.24539	0.49518	-1.01397	down
Cmzp034	LysoPC 22:4 (2n isomer1)	Lipids_Glycerophospholipids	736450	867250	721030	354050	354800	385310	1.26317	0.470661	-1.08724	down
MEDN010	L-Citrulline	Amino Acid metabolomics	658970	537870	487650	268640	230160	255260	1.24187	0.447649	-1.15956	down
MEDN017	L-Pyroglutamic Acid	Amino Acid metabolomics	19790	11785	35553	71273	65967	70881	1.13756	3.10036	1.63244	up
MEDN027	3-N-Methyl-L-Histidine	Amino Acid metabolomics	25104	45760	34191	191780	268240	209660	1.25146	6.37457	2.67233	up
MEDN042	L-Asparagine Anhydrous	Amino Acid metabolomics	35789	50094	41721	108100	101250	87335	1.23653	2.32504	1.21726	up
MEDN056	N-Acetyl-L-Leucine	Amino Acid metabolomics	353170	444850	374620	122220	97918	107930	1.26632	0.279769	-1.83769	down
MEDN058	N-Acetylneuraminic Acid	Amino Acid metabolomics	658980	719950	584690	295770	272720	285430	1.26534	0.43487	-1.20134	down
MEDN138	1-Methylhistidine	Amino Acid metabolomics	13715	26662	20984	156810	141390	123390	1.25354	6.87065	2.78045	up
MEDN140	2,6-Dihydroxypurine	Nucleotide metabolomics	1701500	1650200	1695900	321960	450960	410850	1.26977	0.234521	-2.09221	down
MEDN152	Adenosine 5'-Diphosphate	Nucleotide metabolomics	3564400	4600900	3000600	7422700	8612000	9473000	1.20924	2.28443	1.19183	up
MEDN160	Guanosine	Nucleotide metabolomics	24884000	29220000	23373000	54290000	57707000	49890000	1.2527	2.08948	1.06315	up
MEDN161	Guanosine 3',5'-Cyclic Monophosphate	Nucleotide metabolomics	29883	15627	19038	41734	58293	32965	1.05563	2.06036	1.0429	up
MEDN162	Guanosine Monophosphate	Nucleotide metabolomics	602130	411860	512330	4740400	5801500	6065800	1.27225	10.8809	3.44372	up
MEDN163	Hypoxanthine	Nucleotide metabolomics	5040100	4285300	5342700	950590	943160	834720	1.27444	0.186014	-2.42652	down
MEDN165	Inosine 5'-Monophosphate	Nucleotide metabolomics	3083200	3196000	3091000	8983200	10048000	9370100	1.27777	3.03102	1.59981	up
MEDN220	D-Glucose	Carbohydrate metabolomics	535140	588360	592360	238550	199180	241960	1.26604	0.396122	-1.33598	down
MEDN221	D-Mannose	Carbohydrate metabolomics	784060	765340	717220	294750	261460	298780	1.27399	0.377209	-1.40656	down
MEDN237	D-Glucoronic Acid	Carbohydrate metabolomics	85072	65302	82519	20289	30075	21853	1.24301	0.310087	-1.68926	down
MEDN283	2-Hydroxybutanoic Acid	Organic Acid And Its Derivatives	769270	889500	777730	148300	127250	200480	1.26336	0.195375	-2.35569	down
MEDN317	Hippuric Acid	Amino Acid metabolomics	225030	282640	224950	52155	42250	49732	1.27114	0.196742	-2.34562	down
MEDN325	L-Lactic Acid	Organic Acid And Its Derivatives	872900	855050	835800	127420	117720	133830	1.27969	0.147819	-2.7581	down
MEDN335	Methylmalonic Acid	Organic Acid And Its Derivatives	10950000	12459000	10859000	5429600	4174300	5520300	1.24401	0.441351	-1.18	down
MEDN350	(±)15-HETE [(±)15-hydroxy-5Z,8Z,11Z,13E-eicosatetraenoic acid]	Oxidized lipid	8980.5	7864.4	7719.2	41534	30962	42617	1.26715	4.68623	2.22843	up
MEDN351	12-Hete	Lipids_Fatty Acids	786440	966150	828540	2072600	1883300	2210300	1.26031	2.38895	1.25638	up
MEDN373	LipoxinA4 [5S,6R,15S-trihydroxy-7E,9E,11Z,13E-eicosatetraenoic acid]	Oxidized lipid	9	9	9	45899	42589	39413	1.2807	4737.07	12.2098	up
MEDN469	Citraconic Acid	Organic Acid And Its Derivatives	463840	480110	420250	9	9	9	1.28063	1.97918e-05	-15.6247	down
MEDN478	Aminomalonic Acid	Organic Acid And Its Derivatives	413600	507490	442680	190390	187160	259690	1.22311	0.467264	-1.09769	down
MEDN490	Fumaric Acid	Amino Acid metabolomics	270650	214930	173670	99839	69270	91529	1.20177	0.395355	-1.33878	down
MEDN499	Argininosuccinic acid	Organic Acid And Its Derivatives	2750400	2928700	2974700	1215100	1237200	1361200	1.27469	0.440673	-1.18222	down
MEDN528	(3-Methoxy-4-hydroxyphenyl)ethylene glycol sulfate	Organic Acid And Its Derivatives	28715	39643	33471	7611.3	5798.4	5202.3	1.26086	0.182777	-2.45184	down
MEDN533	Xanthosine	Nucleotide metabolomics	1725100	1867800	1803700	692590	497950	630960	1.25875	0.337527	-1.56692	down
MEDN536	estrone 3-sulfate	Hormones	4700.7	6237.6	4581	19347	14988	16930	1.25483	3.30331	1.72391	up
MEDN553	2-Methylbenzoic acid	Benzene and substituted derivatives	682520	693430	737290	105700	132460	125020	1.27712	0.171859	-2.5407	down
MEDN579	N-lactoyl-phenylalanine	Amino Acid metabolomics	149900	192560	174000	18432	17811	23279	1.2747	0.11525	-3.11716	down
MEDN624	5'-Adenylyl sulfate (APS)	Nucleotide metabolomics	6066800	6511100	4937400	11662000	12684000	13505000	1.24351	2.16102	1.11172	up
MEDN662	Gamma-Glu-Leu	Organic Acid And Its Derivatives	1151700	1393700	1216200	3378900	2741800	3241800	1.2589	2.48897	1.31555	up
MEDN669	5-oxoETE [5-oxo-6E,8Z,11Z,14Z-eicosatetraenoic acid]	Oxidized lipid	14882	12365	10500	105470	102730	113230	1.2744	8.51538	3.09007	up
MEDN713	6-Phosphogluconic Acid Trisodium Salt	Carbohydrate metabolomics	339640	339850	377850	1267900	1106400	1156200	1.27629	3.33904	1.73943	up
MEDN750	(±)12-HEPE [(±)-12-hydroxy-5Z,8Z,10E,14Z,17Z-eicosapentaenoic acid]	Oxidized lipid	113180	151300	116450	364340	315470	360670	1.25442	2.73142	1.44965	up
MEDN751	(±)12-HETE [(±)12-hydroxy-5Z,8Z,10E,14Z-eicosatetraenoic acid]	Oxidized lipid	1239300	1473700	1317600	3306700	2833600	3421200	1.26038	2.37223	1.24624	up
MEDN753	(±)16-HETE [(±)16-hydroxy-5Z,8Z,11Z,14Z-eicosatetraenoic acid]	Oxidized lipid	7269.7	8461.3	9965	20982	19739	21710	1.25253	2.4296	1.28072	up
MEDN756	(±)18-HEPE [(±)-18-hydroxy-5Z,8Z,11Z,14Z,16E-eicosapentaenoic acid]	Oxidized lipid	72186	87863	70496	269740	224500	284370	1.26327	3.37726	1.75585	up
MEDN758	(±)4-HDHA [(±)4-hydroxy-5E,7Z,10Z,13Z,16Z,19Z-docosahexaenoic acid]	Oxidized lipid	11703	8674.5	8447.2	62801	63733	63923	1.27298	6.60742	2.72409	up
MEDN759	(±)5-HEPE [(±)-5-hydroxy-6E,8Z,11Z,14Z,17Z-eicosapentaenoic acid]	Oxidized lipid	4841.8	8885	7678	23979	17616	22163	1.20209	2.97868	1.57467	up
MEDN760	(±)5-HETE [(±)5-hydroxy-6E,8Z,11Z,14Z-eicosatetraenoic acid]	Oxidized lipid	92359	105960	100880	338350	290160	358020	1.27044	3.29724	1.72126	up
MEDN761	(±)7-HDHA [(±)7-hydroxy-4Z,8E,10Z,13Z,16Z,19Z-docosahexaenoic acid]	Oxidized lipid	3716.1	3603	3139.8	20690	18203	20443	1.27701	5.67325	2.50418	up
MEDN763	(±)9-HETE [(±)-9-hydroxy-5Z,7E,11Z,14Z-eicosatetraenoic acid]	Oxidized lipid	43044	46855	46194	132670	110640	138700	1.26744	2.80698	1.48902	up
MEDN765	11,12-EET [(±)11,(12)-epoxy-5Z,8Z,14Z-eicosatrienoic acid]	Oxidized lipid	192550	194460	179340	975860	873210	954830	1.27894	4.95083	2.30767	up
MEDN768	13-oxoODE [13-oxo-9Z,11E-octadecadienoic acid]	Oxidized lipid	48353	47190	42853	142090	109420	135920	1.26227	2.79943	1.48513	up
MEDN769	14(S)-HDHA [14S-hydroxy-4Z,7Z,10Z,12E,16Z,19Z-docosahexaenoic acid]	Oxidized lipid	13155	15750	9899.2	75757	58046	68823	1.25886	5.22175	2.38453	up
MEDN771	15-oxoETE [15-oxo-5Z,8Z,11Z,13E-eicosatetraenoic acid]	Oxidized lipid	80794	63221	57279	568630	480650	572290	1.2728	8.05573	3.01002	up
MEDN776	5(S),15(S)-DiHETE [5S,15S-dihydroxy-6E,8Z,10Z,13E-eicosatetraenoic acid]	Oxidized lipid	9	9	9	8063.5	7521.4	7862.4	1.28066	868.419	9.76225	up
MEDN778	5,6-EET [(±)5,6-epoxy-8Z,11Z,14Z-eicosatrienoic acid]	Oxidized lipid	5265.5	4264.7	2856.5	13970	13814	17552	1.22683	3.66005	1.87187	up
MEDN779	5-HETrE [5S-hydroxy-6E,8Z,11Z-eicosatrienoic acid]	Oxidized lipid	17117	17435	17369	61930	53141	61115	1.27666	3.39335	1.76271	up
MEDN782	8,9-EET [(±)8,9-epoxy-5Z,11Z,14Z-eicosatrienoic acid]	Oxidized lipid	17996	16877	14449	58544	51478	60805	1.26938	3.46351	1.79223	up
MEDN791	PGD1 [9α,15S-dihydroxy-11-oxo-prost-13E-en-1-oic acid]	Oxidized lipid	21443	26329	22738	47968	47048	51409	1.25905	2.07666	1.05426	up
MEDN793	PGE2 [9-oxo-11α,15S-dihydroxy-prosta-5Z,13E-dien-1-oic acid]	Oxidized lipid	615390	702670	624090	1394200	1270100	1458500	1.2649	2.1228	1.08597	up
MEDN844	Stachyose	Carbohydrate metabolomics	27949	33041	32054	10001	16035	6878	1.16365	0.353747	-1.49921	down
MEDP020	L-Methionine	Amino Acid metabolomics	7750000	7578700	7367200	17076000	12940000	15500000	1.24661	2.00547	1.00394	up
MEDP035	5-Hydroxy-L-Tryptophan	Amino Acid metabolomics	24607	28775	26694	229760	172990	218120	1.27496	7.75351	2.95485	up
MEDP051	L-Cystathionine	Amino Acid metabolomics	25189000	24909000	27030000	4443600	5137300	4789000	1.27877	0.186312	-2.4242	down
MEDP060	Methionine Sulfoxide	Amino Acid metabolomics	252280	261010	288960	522450	592380	501850	1.25975	2.01518	1.01091	up
MEDP061	N,N-Dimethylglycine	Amino Acid metabolomics	1395500	1560500	1174800	2986500	2721800	2745200	1.24473	2.04646	1.03313	up
MEDP082	S-Sulfo-L-Cysteine	Amino Acid metabolomics	99208	111300	115440	20524	20094	18739	1.27784	0.182106	-2.45715	down
MEDP115	1,4-Dihydro-1-Methyl-4-Oxo-3-Pyridinecarboxamide	Pyridine And Pyridine Derivatives	220680	196840	227760	424590	513590	514060	1.25644	2.25056	1.17028	up
MEDP156	5-Methyluridine	Nucleotide metabolomics	290170	327320	252250	655500	607280	772860	1.24283	2.34052	1.22683	up
MEDP158	8-Hydroxyguanosine	Nucleotide metabolomics	54713	74057	45863	132000	204510	169540	1.20503	2.89779	1.53495	up
MEDP176	Thymidine	Nucleotide metabolomics	373850	517040	440860	113690	103430	101640	1.26795	0.239354	-2.06278	down
MEDP205	L-Carnitine	Carnitine	434270	511080	493190	1106100	849870	1071000	1.23947	2.1042	1.07327	up
MEDP208	Succinic Acid	Amino Acid metabolomics	286580	310370	275600	105830	94964	149270	1.2281	0.401196	-1.31762	down
MEDP251	Trigonelline	CoOthersEnzyme Factor & vitamin	87489	119160	87486	24442	2958.3	18731	1.08768	0.156837	-2.67266	down
MEDP276	Indole-3-Carboxaldehyde	Indole And Its Derivatives	16500	14628	14040	33627	27112	30629	1.25064	2.02285	1.01639	up
MEDP297	5-Aminovaleric Acid	Organic Acid And Its Derivatives	246490	248110	258040	103530	94079	97733	1.27729	0.392408	-1.34957	down
MEDP313	Guanidineacetic Acid	Organic Acid And Its Derivatives	209580	212590	154640	78710	68308	76248	1.24564	0.38707	-1.36933	down
MEDP375	Deoxyadenosine	Nucleotide metabolomics	551770	674560	552080	1440000	1123100	1206100	1.23893	2.11942	1.08367	up
MEDP393	Pyridoxine 5'-Phosphate	CoOthersEnzyme Factor & vitamin	29531	27704	26055	14158	8457.7	6175.6	1.16921	0.345675	-1.53251	down
MEDP430	2-Aminoadipic Acid	Organic Acid And Its Derivatives	430840	477900	485430	3923800	3457400	3581200	1.27925	7.86303	2.97509	up
MEDP523	DL-Carnitine	Carnitine	1803700	1940000	1768700	4118400	4072200	4502300	1.27326	2.30261	1.20327	up
MEDP529	Indole-3-acetamide	Indole And Its Derivatives	9	9	9	150970	130370	180170	1.28032	17093	14.0611	up
MEDP550	18-Hydroxycorticosterone	Hormones	95645	83207	67320	412360	427870	489550	1.26838	5.40183	2.43345	up
MEDP551	N-METHYL (-)EPHEDRINE	Benzene and substituted derivatives	591100	705970	563050	154310	103300	149610	1.25779	0.218921	-2.19152	down
MEDP577	Isobutyryl carnitine (CAR C4:0)	Carnitine	1330800	1531700	1686200	627220	505370	606840	1.25536	0.382402	-1.38684	down
MEDP583	Asp-Phe methyl ester	Others	1353600	1931700	1462000	5333300	4651200	5587200	1.25458	3.28012	1.71375	up
MEDP618	2-Methylbutyroylcarnitine (CAR C5:0)	Carnitine	140530	196130	191330	399780	358660	416020	1.23048	2.2244	1.15342	up
MEDP691	Ethylparaben	Benzene and substituted derivatives	943880	1130900	1033400	154250	124610	153770	1.27562	0.139191	-2.84486	down
MEDP745	Creosol	Phenols And Its Derivatives	775690	885000	881090	217050	165960	207850	1.26999	0.232459	-2.10495	down
MEDP845	1-Phenylethanol	Benzene and substituted derivatives	3780400	4377300	3915500	8721400	8049100	7976400	1.26774	2.04974	1.03544	up
MEDP874	tryptophan betaine	Amino Acid metabolomics	49417	51836	48501	498310	444310	509640	1.2795	9.69764	3.27763	up
MEDP878	N-Methyl-L-Glutamate	Amino Acid metabolomics	165580	178710	173870	1728400	1550600	1778000	1.27948	9.75953	3.28681	up
MWS0970-P	biliverdin	Tryptamine, Choline, pigment	9257.4	15717	10458	185690	177380	250990	1.26823	17.3305	4.11524	up
MWS1882-N	Iminodiacetic acid	Amines	563070	654380	610530	1236600	1336600	1307000	1.26911	2.12267	1.08588	up
Whmp0305	Oxypurinol	Nucleotide metabolomics	2351000	2437900	2356400	639840	577820	496870	1.27271	0.239952	-2.05918	down
Wmjn0416	Inosine-5'-monophosphate	Nucleotide metabolomics	4233900	4049000	4136000	13377000	13511000	10537000	1.26783	3.01355	1.59146	up
Wmjp0774	ALANYL-dl-LEUCINE	Amino Acid metabolomics	48047	70677	57297	176610	180520	178400	1.25561	3.04242	1.60522	up

## Sheet: S3-0 vs S1-0
Index	Compounds	Class	S1-0a	S1-0b	S1-0c	S3-0a	S3-0b	S3-0c	VIP	Fold_Change	Log2FC	Type
Cmhp057	CAR C12:1-OH	Carnitine	377260	345590	321240	9	9	9	1.26752	2.58598e-05	-15.2389	down
MEDN776	5(S),15(S)-DiHETE [5S,15S-dihydroxy-6E,8Z,10Z,13E-eicosatetraenoic acid]	Oxidized lipid	33774	31370	31833	9	9	9	1.26752	0.000278417	-11.8105	down
Cmhp023	CAR C8:1	Carnitine	37663	27795	30471	9	9	9	1.26732	0.000281458	-11.7948	down
MEDN373	LipoxinA4 [5S,6R,15S-trihydroxy-7E,9E,11Z,13E-eicosatetraenoic acid]	Oxidized lipid	16931	11517	12465	9	9	9	1.26705	0.000659937	-10.5654	down
MEDN244	Orotic Acid	CoOthersEnzyme Factor & vitamin	2126400	1675700	1337300	75545	82277	40088	1.25161	0.0385084	-4.69868	down
MEDN769	14(S)-HDHA [14S-hydroxy-4Z,7Z,10Z,12E,16Z,19Z-docosahexaenoic acid]	Oxidized lipid	282410	224470	234630	13155	15750	9899.2	1.26086	0.0523313	-4.25618	down
MWS0965-N	24,25-Dihydrolanosterol	Lipids_others	30170	25405	21385	1700.1	2093.7	1261.1	1.25713	0.0656822	-3.92835	down
MEDN759	(±)5-HEPE [(±)-5-hydroxy-6E,8Z,11Z,14Z,17Z-eicosapentaenoic acid]	Oxidized lipid	81678	65353	71980	4841.8	8885	7678	1.25115	0.0977339	-3.355	down
MEDN028	4-Hydroxy-L-Glutamic Acid	Amino Acid metabolomics	321610	234190	263860	38467	26666	25480	1.25457	0.110549	-3.17724	down
MEDN161	Guanosine 3',5'-Cyclic Monophosphate	Nucleotide metabolomics	233920	173360	154030	29883	15627	19038	1.24114	0.114995	-3.12035	down
MEDN761	(±)7-HDHA [(±)7-hydroxy-4Z,8E,10Z,13Z,16Z,19Z-docosahexaenoic acid]	Oxidized lipid	31921	29494	28243	3716.1	3603	3139.8	1.26539	0.116653	-3.0997	down
MEDN758	(±)4-HDHA [(±)4-hydroxy-5E,7Z,10Z,13Z,16Z,19Z-docosahexaenoic acid]	Oxidized lipid	89598	75869	75183	11703	8674.5	8447.2	1.25976	0.119779	-3.06156	down
MEDP878	N-Methyl-L-Glutamate	Amino Acid metabolomics	1429900	1485800	1372500	165580	178710	173870	1.26701	0.120834	-3.0489	down
MEDP430	2-Aminoadipic Acid	Organic Acid And Its Derivatives	3925400	3555900	3404800	430840	477900	485430	1.26599	0.128069	-2.96501	down
MEDP550	18-Hydroxycorticosterone	Hormones	709930	577930	500320	95645	83207	67320	1.25468	0.137666	-2.86075	down
MEDN756	(±)18-HEPE [(±)-18-hydroxy-5Z,8Z,11Z,14Z,16E-eicosapentaenoic acid]	Oxidized lipid	542200	455510	454830	72186	87863	70496	1.26167	0.158719	-2.65546	down
MEDN778	5,6-EET [(±)5,6-epoxy-8Z,11Z,14Z-eicosatrienoic acid]	Oxidized lipid	25508	20931	22450	5265.5	4264.7	2856.5	1.23849	0.179807	-2.47548	down
MEDN143	3'-Aenylic Acid	Nucleotide metabolomics	11610000	9899600	9356600	1690600	2229800	1951300	1.25853	0.190231	-2.39418	down
MEDP859	glycylphenylalanine	Amino Acid metabolomics	554040	638130	569900	69797	124660	152200	1.22002	0.196733	-2.34569	down
MEDN419	Uridine 5-Monophosphate	Nucleotide metabolomics	22551000	20983000	22192000	4119500	4736000	4118600	1.26498	0.197397	-2.34083	down
MEDN750	(±)12-HEPE [(±)-12-hydroxy-5Z,8Z,10E,14Z,17Z-eicosapentaenoic acid]	Oxidized lipid	710840	583790	569120	113180	151300	116450	1.25473	0.204389	-2.29061	down
MEDN156	Cytidine-5-Monophosphate	Nucleotide metabolomics	324910	247980	199780	27506	89923	63244	1.14002	0.233829	-2.09647	down
MEDP618	2-Methylbutyroylcarnitine (CAR C5:0)	Carnitine	833200	670620	714810	140530	196130	191330	1.24969	0.23798	-2.07109	down
MEDN760	(±)5-HETE [(±)5-hydroxy-6E,8Z,11Z,14Z-eicosatetraenoic acid]	Oxidized lipid	434810	389440	376670	92359	105960	100880	1.26345	0.249141	-2.00496	down
MEDP089	N-Acetylhistamine	Amines	156840	95146	105820	27133	52761	11158	1.07657	0.254473	-1.97441	down
MEDP697	2,6-Di-tert-butyl-4-methylphenol	Benzene and substituted derivatives	949340	301340	717590	85788	206260	239680	1.02672	0.27015	-1.88817	down
Wmjp1814	2',6'-Dihydroxy-4'-methoxyacetophenone	Benzene and substituted derivatives	774440	260570	613920	80026	176120	193770	1.04905	0.272853	-1.8738	down
Wmjp0785	Threoninyl-Phenylalanine	Amino Acid metabolomics	265920	217880	142850	48936	90704	54650	1.15813	0.310045	-1.68945	down
Cmmn0580	N-Acetyl-alpha-D-glucosamine 1-phosphate	Organic Acid And Its Derivatives	505990	282340	449420	144480	89227	154510	1.16607	0.313647	-1.67278	down
Wmjp0831	?Valylleucine	Amino Acid metabolomics	411820	354050	364980	128890	118820	112620	1.2607	0.318636	-1.65002	down
Wmxn3693	Methoprene acid	Organic Acid And Its Derivatives	3248200	2575100	2573900	919420	901220	915290	1.25628	0.325815	-1.61788	down
MEDN017	L-Pyroglutamic Acid	Amino Acid metabolomics	45554	67481	92665	19790	11785	35553	1.06514	0.326339	-1.61556	down
MEDP437	Ergothioneine	Organic Acid And Its Derivatives	3490400	2993100	2644400	961350	1033600	1008700	1.25448	0.329063	-1.60357	down
MEDN398	AA [5Z,8Z,11Z,14Z-eicosatetraenoic acid]	Oxidized lipid	1027800	958810	905560	304670	367280	308770	1.25729	0.339095	-1.56024	down
MEDN669	5-oxoETE [5-oxo-6E,8Z,11Z,14Z-eicosatetraenoic acid]	Oxidized lipid	42562	32275	35619	14882	12365	10500	1.23266	0.341738	-1.54904	down
MEDN390	EPA [5Z,8Z,11Z,14Z,17Z-eicosapentaenoic acid]	Oxidized lipid	44513000	41511000	40573000	13632000	16594000	14272000	1.25802	0.351493	-1.50843	down
MEDN140	2,6-Dihydroxypurine	Nucleotide metabolomics	4820200	4861700	4516100	1701500	1650200	1695900	1.26623	0.355515	-1.49202	down
Wmjn0167	Uridine 5'-monophosphate	Nucleotide metabolomics	2923000	2672400	2897200	1090900	994190	959610	1.26194	0.358512	-1.47991	down
MEDN751	(±)12-HETE [(±)12-hydroxy-5Z,8Z,10E,14Z-eicosatetraenoic acid]	Oxidized lipid	4099400	3570500	3504400	1239300	1473700	1317600	1.25611	0.360703	-1.47112	down
Wmjp0958	L-Valyl-L-phenylalanine	Amino Acid metabolomics	174360	206790	225670	73360	96185	54667	1.19304	0.369487	-1.43641	down
MEDN351	12-Hete	Lipids_Fatty Acids	2590600	2241300	2133700	786440	966150	828540	1.25015	0.370554	-1.43224	down
Cmhp083	CAR C17:1	Carnitine	20815	17513	22210	4324.3	8802.1	9586.7	1.13143	0.375187	-1.41432	down
MEDN771	15-oxoETE [15-oxo-5Z,8Z,11Z,13E-eicosatetraenoic acid]	Oxidized lipid	197270	174720	163990	80794	63221	57279	1.23414	0.375563	-1.41287	down
MEDN350	(±)15-HETE [(±)15-hydroxy-5Z,8Z,11Z,13E-eicosatetraenoic acid]	Oxidized lipid	21968	21959	20319	8980.5	7864.4	7719.2	1.25956	0.382344	-1.38706	down
Cmhp091	CAR C18:2	Carnitine	34157	30934	27721	9665.8	13883	11990	1.23054	0.382912	-1.38492	down
MEDN763	(±)9-HETE [(±)-9-hydroxy-5Z,7E,11Z,14Z-eicosatetraenoic acid]	Oxidized lipid	133970	115360	105720	43044	46855	46194	1.25366	0.383307	-1.38343	down
MEDP442	Sn-Glycero-3-Phosphocholine	Tryptamine, Choline, pigment	67637000	66803000	64281000	26774000	27705000	25589000	1.26523	0.402917	-1.31145	down
MEDN724	Aspirin	Organic Acid And Its Derivatives	573250	296220	417740	159510	181320	179640	1.15878	0.40434	-1.30636	down
MEDN753	(±)16-HETE [(±)16-hydroxy-5Z,8Z,11Z,14Z-eicosatetraenoic acid]	Oxidized lipid	23429	18962	20018	7269.7	8461.3	9965	1.23146	0.411735	-1.28021	down
Whmp0305	Oxypurinol	Nucleotide metabolomics	6248700	5511700	5421400	2351000	2437900	2356400	1.26112	0.415864	-1.26581	down
Cmzp003	LysoPC 16:1	Lipids_Glycerophospholipids	6523600	5595100	4888300	1881900	2640400	2716600	1.20358	0.425642	-1.23229	down
MEDP461	2-Methylguanosine	Nucleotide metabolomics	479430	363740	419120	194110	182420	161540	1.23649	0.426265	-1.23018	down
MEDP143	Biotin	CoOthersEnzyme Factor & vitamin	95791	77838	81229	41919	35114	32666	1.23538	0.430432	-1.21614	down
Wmjn1628	Riboflavin-5'-monophosphate	Nucleotide metabolomics	100090	80165	82176	34317	45425	33714	1.22024	0.432327	-1.20981	down
Cmhp014	CAR C5-OH(3)	Carnitine	405040	344100	271690	147050	148960	145930	1.22178	0.432922	-1.20782	down
Wmjp0774	ALANYL-dl-LEUCINE	Amino Acid metabolomics	150670	136930	118310	48047	70677	57297	1.2109	0.433645	-1.20541	down
MEDP244	All-Trans-13,14-Dihydroretinol	CoOthersEnzyme Factor & vitamin	187170	184150	181370	59243	98205	87500	1.19087	0.443192	-1.17399	down
MEDP853	Choline chloride	Tryptamine, Choline, pigment	26039000	23388000	21680000	10313000	11936000	10338000	1.24732	0.458281	-1.1257	down
MEDN068	S-(5-Adenosy)-L-Homocysteine	Amino Acid metabolomics	1516900	1432100	1135000	598330	602720	670620	1.23188	0.458293	-1.12566	down
MEDP011	L-Lysine	Amino Acid metabolomics	31979000	23087000	25418000	18326000	10290000	9955000	1.0991	0.479238	-1.06119	down
MEDP054	L-Glutamine	Amino Acid metabolomics	27325000	20084000	23966000	15087000	8819600	10547000	1.14029	0.482712	-1.05076	down
MEDP061	N,N-Dimethylglycine	Amino Acid metabolomics	2978200	2741400	2737500	1395500	1560500	1174800	1.23198	0.488442	-1.03374	down
MEDN768	13-oxoODE [13-oxo-9Z,11E-octadecadienoic acid]	Oxidized lipid	97563	90934	92235	48353	47190	42853	1.25838	0.492983	-1.02039	down
Cmhp013	CAR C4:DC	Carnitine	307230	239120	213750	131310	139900	105830	1.18126	0.49604	-1.01147	down
MEDP868	N-methylalanine	Amino Acid metabolomics	1290900	1133100	1271200	582430	663760	593860	1.25054	0.497957	-1.00591	down
MEDP056	L-Homocystine	Amino Acid metabolomics	74435	48310	88826	39219	27877	38539	1.07302	0.499289	-1.00205	down
MEDP405	3-Aminoisobutanoic Acid	Amino Acid metabolomics	289010	259770	231140	114470	127230	148120	1.22116	0.49982	-1.00052	down
Cmzp023	LysoPC 20:2	Lipids_Glycerophospholipids	8489500	7249000	6863500	13835000	16792000	14776000	1.22998	2.0088	1.00634	up
Cmmn0476	2-C-Methyl-D-erythritol 2,4-cyclodiphosphate	Organic Acid And Its Derivatives	4889700	4556500	4743700	10058000	8965900	9998800	1.25827	2.04531	1.03232	up
Cmzn015	LysoPE 20:4	Lipids_Glycerophospholipids	11184000	10556000	9351600	19206000	23542000	21086000	1.23693	2.05309	1.0378	up
Cmzn016	LysoPE 20:4(2n isomer1)	Lipids_Glycerophospholipids	10621000	10090000	9276300	19783000	23309000	20697000	1.2496	2.1272	1.08896	up
Wmjp0837	Indole-3-carboxyaldehyde	Indole And Its Derivatives	131370	124000	112230	262340	282020	253390	1.25403	2.17016	1.1178	up
MEDP062	N6-Acetyl-L-Lysine	Amino Acid metabolomics	82517	76625	39961	149340	153630	131350	1.09896	2.18138	1.12524	up
Cmzp018	LysoPC 20:4	Lipids_Glycerophospholipids	34259000	30066000	29654000	64563000	73084000	68366000	1.25296	2.19212	1.13233	up
MEDN463	D-Fructose 6-Phosphate-Disodium Salt	Carbohydrate metabolomics	8257200	7236100	7179100	16178000	17190000	16373000	1.25707	2.1939	1.1335	up
MEDN499	Argininosuccinic acid	Organic Acid And Its Derivatives	1378300	1254500	1290700	2750400	2928700	2974700	1.26151	2.20563	1.14119	up
MEDP275	Indole-3-Acetic Acid	Indole And Its Derivatives	768620	657600	701610	1601600	1704000	1502900	1.2546	2.25981	1.1762	up
MEDN478	Aminomalonic Acid	Organic Acid And Its Derivatives	265780	178270	151310	413600	507490	442680	1.16765	2.29066	1.19577	up
MEDN561	N-Acetylaspartylglutamic acid	Amino Acid metabolomics	242560	210130	167280	445070	469690	510510	1.22056	2.29893	1.20096	up
MEDN325	L-Lactic Acid	Organic Acid And Its Derivatives	448020	322730	328420	872900	855050	835800	1.22825	2.33244	1.22184	up
MEDN336	N'-Formylkynurenine	Organic Acid And Its Derivatives	15548	13006	12057	29956	37174	28208	1.22452	2.34759	1.23118	up
MEDP691	Ethylparaben	Benzene and substituted derivatives	494820	394300	380790	943880	1130900	1033400	1.23755	2.44756	1.29134	up
MEDN056	N-Acetyl-L-Leucine	Amino Acid metabolomics	183190	143230	132170	353170	444850	374620	1.22698	2.55706	1.35448	up
MEDN579	N-lactoyl-phenylalanine	Amino Acid metabolomics	69090	66415	61057	149900	192560	174000	1.24912	2.62747	1.39367	up
MEDN227	D-Glucose 6-Phosphate	Carbohydrate metabolomics	14695000	12486000	13423000	35865000	37471000	34130000	1.25941	2.64669	1.40419	up
MEDN170	Uridine 5’-Diphosphate	Nucleotide metabolomics	262350	251130	222440	622760	736410	604160	1.25097	2.66786	1.41568	up
MEDP821	6-Methylnicotinamide	Pyridine And Pyridine Derivatives	563770	450870	420790	1258300	1882200	915040	1.15495	2.82531	1.49841	up
Cmhp012	CAR C6:0 Isomer 2	Carnitine	118290	74543	78137	224360	291400	249930	1.20794	2.82574	1.49863	up
MEDN480	Dl-Glyceraldehyde3-Phosphate	Organic Acid And Its Derivatives	2100600	2864700	2514300	7196300	8217200	7660500	1.24978	3.08492	1.62524	up
Cmhp010	CAR C6:0	Carnitine	89161	37820	67850	189380	229660	186810	1.15918	3.10962	1.63674	up
MEDN039	Glutathione Reducedform	Amino Acid metabolomics	356510	265210	359120	1001100	1067300	1066400	1.24841	3.19604	1.67628	up
MEDN624	5'-Adenylyl sulfate (APS)	Nucleotide metabolomics	1799700	1759000	1594800	6066800	6511100	4937400	1.25371	3.39872	1.76499	up
MEDN152	Adenosine 5'-Diphosphate	Nucleotide metabolomics	1114900	1126700	1023700	3564400	4600900	3000600	1.2406	3.41956	1.77381	up
MEDN413	Ethylmalonate	Organic Acid And Its Derivatives	8095.5	7175.3	6966.2	30176	27223	19076	1.2328	3.43909	1.78203	up
Cmzn024	LysoPE 22:5(2n isomer2)	Lipids_Glycerophospholipids	3483500	3191400	2973200	10680000	13190000	11320000	1.25794	3.64735	1.86685	up
Cmzn025	LysoPE 22:5(2n isomer3)	Lipids_Glycerophospholipids	3456200	3127300	2790000	9920900	13100000	11618000	1.25168	3.69541	1.88573	up
MEDP051	L-Cystathionine	Amino Acid metabolomics	6460800	6894200	7007700	25189000	24909000	27030000	1.26582	3.78771	1.92133	up
Cmzn023	LysoPE 22:5(2n isomer1)	Lipids_Glycerophospholipids	3370200	3094400	2911600	10821000	13529000	11382000	1.25815	3.81093	1.93014	up
MEDP177	Thymine	Nucleotide metabolomics	184560	157780	166930	724260	741630	720740	1.26462	4.29366	2.10221	up
Cmhp011	CAR C6:0 Isomer1	Carnitine	67505	38572	36790	210400	245060	177200	1.21777	4.42831	2.14676	up
MEDN485	D-Fructose-1,6-Biphosphate-Trisodium Salt	Carbohydrate metabolomics	1101400	1016700	1006200	4734500	4861500	4621800	1.26618	4.55072	2.18609	up
MEDN314	Glutaric Acid	Organic Acid And Its Derivatives	1167500	816110	876920	4375200	4790000	4130800	1.25242	4.64809	2.21664	up
MEDN285	2-Methylsuccinic Acid	Organic Acid And Its Derivatives	1172700	779700	787970	4173500	4825400	3946800	1.24484	4.72407	2.24003	up
Cmzp033	LysoPC 22:4	Lipids_Glycerophospholipids	150370	103880	122070	748170	857330	664400	1.25419	6.03183	2.5926	up
MEDP403	Deoxycytidine	Nucleotide metabolomics	786080	559320	657230	3345200	4341400	4704700	1.25149	6.18751	2.62936	up
MEDP043	Glutathione Oxidized	Amino Acid metabolomics	551700	390200	401970	2162000	3456100	3149200	1.2433	6.52392	2.70574	up
Cmzp034	LysoPC 22:4 (2n isomer1)	Lipids_Glycerophospholipids	150270	75175	113140	736450	867250	721030	1.23893	6.86602	2.77947	up
MEDP176	Thymidine	Nucleotide metabolomics	80406	51924	61162	373850	517040	440860	1.25018	6.88271	2.78298	up
Cmzn018	LysoPE 20:3(2n isomer1)	Lipids_Glycerophospholipids	653450	585050	636650	4123500	4635300	4186700	1.26578	6.90371	2.78737	up
MEDP155	5-Methylcytosine	Nucleotide metabolomics	44865	46417	53854	307020	418260	280190	1.25605	6.92778	2.79239	up
MEDP551	N-METHYL (-)EPHEDRINE	Benzene and substituted derivatives	99778	83874	83096	591100	705970	563050	1.26171	6.97332	2.80185	up
Cmhp015	CAR ph-C1	Carnitine	26647	23766	14958	163200	160030	147320	1.24673	7.19815	2.84763	up
Cmzn017	LysoPE 20:3	Lipids_Glycerophospholipids	642950	555760	552250	3964100	4614500	4185900	1.26433	7.29	2.86592	up
MEDN317	Hippuric Acid	Amino Acid metabolomics	36919	32598	29431	225030	282640	224950	1.26082	7.40409	2.88832	up
MEDN158	Deoxyguanosine	Nucleotide metabolomics	243770	190810	237610	1697200	2173200	2036400	1.26113	8.7874	3.13544	up
Cmzp007	LysoPC 18:3 (2n isomer1)	Lipids_Glycerophospholipids	1251300	1408700	1092000	9989300	12239000	10883000	1.2626	8.82497	3.14159	up
Cmzp008	LysoPC 18:3 (2n isomer2)	Lipids_Glycerophospholipids	1132200	1155000	931660	10334000	11925000	10623000	1.26415	10.2154	3.35268	up
MEDN198	Citric Acid	Amino Acid metabolomics	1099500	667620	588390	11045000	12816000	7752900	1.24567	13.4213	3.74645	up
MEDN321	Kinic Acid	Organic Acid And Its Derivatives	92002	94624	70493	1216400	1365300	1025200	1.26169	14.0281	3.81025	up
Cmzn027	LysoPE 22:4(2n isomer1)	Lipids_Glycerophospholipids	9531.8	11683	5349.3	149700	166840	157000	1.25074	17.8263	4.15594	up
MEDP874	tryptophan betaine	Amino Acid metabolomics	9	9	9	49417	51836	48501	1.26751	5546.44	12.4373	up
MEDN469	Citraconic Acid	Organic Acid And Its Derivatives	9	9	9	463840	480110	420250	1.2675	50525.9	15.6247	up

## Sheet: S3-1 vs S1-1
Index	Compounds	Class	S1-1a	S1-1b	S1-1c	S3-1a	S3-1b	S3-1c	VIP	Fold_Change	Log2FC	Type
Cmhp010	CAR C6:0	Carnitine	69310	40477	46136	196030	188770	177350	1.22271	3.60531	1.85012	up
Cmhp011	CAR C6:0 Isomer1	Carnitine	64230	44199	50568	194120	153910	175040	1.23279	3.28981	1.718	up
Cmhp012	CAR C6:0 Isomer 2	Carnitine	95847	62450	70330	224650	228200	199180	1.2229	2.85194	1.51194	up
Cmhp015	CAR ph-C1	Carnitine	26565	13814	16291	319100	271850	238390	1.24619	14.6346	3.87131	up
Cmhp020	CAR C6-OH(3)	Carnitine	25713	15383	20061	82066	60045	65697	1.21414	3.39794	1.76466	up
Cmhp023	CAR C8:1	Carnitine	50312	20054	30922	9	9	9	1.25907	0.000266567	-11.8732	down
Cmhp034	CAR C8-OH	Carnitine	19035	9627.7	16234	54177	43100	31983	1.14353	2.87905	1.52559	up
Cmhp053	CAR C12:0	Carnitine	18166	15104	17727	66674	53673	63161	1.25015	3.59841	1.84736	up
Cmhp066	CAR C14:0	Carnitine	119530	65896	75472	301350	303260	275860	1.20986	3.37477	1.75479	up
Cmhp074	CAR C14-OH(3)	Carnitine	10979	7364.3	9161.7	34365	38666	39426	1.24273	4.0886	2.03161	up
Cmhp077	CAR C16:1	Carnitine	53088	34460	45902	169800	179590	185250	1.24087	4.00629	2.00227	up
Cmhp087	CAR C15:DC*	Carnitine	9	9	9	85260	78387	70571	1.26172	8674.74	13.0826	up
Cmhp092	CAR C18:1	Carnitine	269210	187650	189500	844860	725730	652770	1.23022	3.43982	1.78233	up
Cmhp101	CAR C17:1:DC*	Carnitine	8988.8	6691.5	8307.4	54125	56945	54504	1.25681	6.90245	2.78711	up
Cmhp102	CAR C18:1-OH(3)	Carnitine	13796	7744.1	7580.1	60638	59254	40237	1.21657	5.4989	2.45914	up
Cmhp113	CAR C21:2	Carnitine	286480	205820	246550	123200	117970	121020	1.21684	0.490208	-1.02853	down
Cmhp123	CAR C22:1	Carnitine	102180	86769	100620	243960	238830	267950	1.25056	2.59261	1.37441	up
Cmhp127	CAR C22:2-OH(3)	Carnitine	46504	34384	42191	96467	112870	107070	1.23498	2.57076	1.3622	up
Cmmn0098	N2-Acetyl-L-ornithine	Amino Acid metabolomics	655000	594710	600300	238880	237590	232890	1.25923	0.383436	-1.38294	down
Cmmn9102	2-hydroxyhexadecanoic acid	Lipids_Fatty Acids	187380	115870	149740	1221800	1092700	1048900	1.2491	7.42489	2.89237	up
Cmzn003	LysoPE 16:0	Lipids_Glycerophospholipids	36871000	30694000	34888000	79493000	80491000	83367000	1.25125	2.37525	1.24808	up
Cmzn004	LysoPE 16:0 (2n isomer)	Lipids_Glycerophospholipids	37318000	30156000	36421000	79288000	75373000	82145000	1.24347	2.27928	1.18858	up
Cmzn006	LysoPE 18:3 (2n isomer)	Lipids_Glycerophospholipids	229030	136330	164980	1913900	1879900	1710700	1.25085	10.3792	3.37562	up
Cmzn007	LysoPE 18:2	Lipids_Glycerophospholipids	109260	67550	86845	288470	285720	326240	1.2277	3.41518	1.77196	up
Cmzn008	LysoPE 18:2 (2n isomer)	Lipids_Glycerophospholipids	707610	669130	671060	4442600	4606300	4545900	1.26117	6.63873	2.73091	up
Cmzn010	LysoPE 18:1 (2n isomer)	Lipids_Glycerophospholipids	309960	176920	223430	2226800	1768100	2212200	1.24412	8.73858	3.1274	up
Cmzn011	LysoPE 18:0	Lipids_Glycerophospholipids	27099000	24971000	29344000	60024000	61004000	66729000	1.25076	2.3062	1.20552	up
Cmzn012	LysoPE 18:0 (2n isomer)	Lipids_Glycerophospholipids	27727000	24873000	29797000	61309000	59661000	63865000	1.25095	2.24322	1.16557	up
Cmzn013	LysoPE 20:5	Lipids_Glycerophospholipids	924530	534910	710710	1795300	1873100	1791300	1.19652	2.51582	1.33103	up
Cmzn014	LysoPE 20:5(2n isomer1)	Lipids_Glycerophospholipids	930580	550810	713180	1899400	1847300	1804700	1.20174	2.52961	1.33891	up
Cmzn015	LysoPE 20:4	Lipids_Glycerophospholipids	12132000	8702500	10623000	36341000	36114000	36321000	1.24708	3.45787	1.78988	up
Cmzn016	LysoPE 20:4(2n isomer1)	Lipids_Glycerophospholipids	12634000	8628200	10650000	36329000	36490000	36947000	1.24234	3.43962	1.78225	up
Cmzn017	LysoPE 20:3	Lipids_Glycerophospholipids	526650	379130	332400	5662500	5949000	5730100	1.2536	14.0057	3.80794	up
Cmzn018	LysoPE 20:3(2n isomer1)	Lipids_Glycerophospholipids	528550	399830	471830	5776500	5991600	5719900	1.25922	12.4896	3.64265	up
Cmzn020	LysoPE 20:2	Lipids_Glycerophospholipids	67249	36943	49484	1097200	1216200	1324100	1.25314	23.6699	4.56498	up
Cmzn023	LysoPE 22:5(2n isomer1)	Lipids_Glycerophospholipids	7984700	4884400	6428900	17632000	17880000	19438000	1.21654	2.84745	1.50967	up
Cmzn024	LysoPE 22:5(2n isomer2)	Lipids_Glycerophospholipids	7960000	4845200	6611700	18850000	17677000	19274000	1.21696	2.87384	1.52298	up
Cmzn025	LysoPE 22:5(2n isomer3)	Lipids_Glycerophospholipids	7961600	4772100	6387200	18289000	18244000	18716000	1.21677	2.88946	1.5308	up
Cmzn027	LysoPE 22:4(2n isomer1)	Lipids_Glycerophospholipids	27861	18865	27173	232440	245730	234190	1.25486	9.63964	3.26898	up
Cmzp002	LysoPC 14:0 (2n isomer)	Lipids_Glycerophospholipids	17511000	12474000	13419000	40383000	40274000	41470000	1.23615	2.81373	1.49248	up
Cmzp004	LysoPC 16:1 (2n isomer)	Lipids_Glycerophospholipids	46377000	32184000	34274000	179510000	174140000	179240000	1.24755	4.72274	2.23962	up
Cmzp007	LysoPC 18:3 (2n isomer1)	Lipids_Glycerophospholipids	924800	392790	681280	14491000	16204000	14581000	1.24653	22.6508	4.50149	up
Cmzp008	LysoPC 18:3 (2n isomer2)	Lipids_Glycerophospholipids	896110	517680	591230	13827000	14153000	14532000	1.25368	21.2028	4.40618	up
Cmzp010	LysoPC 18:2	Lipids_Glycerophospholipids	8633500	7906300	7214400	41493000	42737000	44851000	1.25752	5.43403	2.44202	up
Cmzp011	LysoPC 18:2 (2n isomer)	Lipids_Glycerophospholipids	9032500	7777800	7337300	42977000	43780000	44813000	1.25703	5.44857	2.44588	up
Cmzp012	LysoPC 18:1	Lipids_Glycerophospholipids	8429800	11897000	9776700	45262000	48606000	50953000	1.24998	4.81077	2.26627	up
Cmzp013	LysoPC 18:1 (2n isomer)	Lipids_Glycerophospholipids	8205300	12167000	9997200	41718000	46834000	44405000	1.2461	4.37798	2.13026	up
Cmzp014	LysoPC 18:0	Lipids_Glycerophospholipids	27715000	21552000	23812000	100290000	100250000	107110000	1.25394	4.20983	2.07376	up
Cmzp015	LysoPC 18:0 (2n isomer)	Lipids_Glycerophospholipids	27803000	21439000	24201000	99276000	98661000	94350000	1.25418	3.97978	1.99269	up
Cmzp016	LysoPC 20:5 (2n isomer)	Lipids_Glycerophospholipids	5302000	3293300	4432100	13829000	14571000	14521000	1.22962	3.29467	1.72013	up
Cmzp017	LysoPC 20:5	Lipids_Glycerophospholipids	5026700	3543000	4141500	13681000	13958000	13514000	1.24342	3.23754	1.6949	up
Cmzp018	LysoPC 20:4	Lipids_Glycerophospholipids	26813000	18267000	20076000	45353000	81244000	80194000	1.17054	3.17378	1.6662	up
Cmzp019	LysoPC 20:4 (2n isomer)	Lipids_Glycerophospholipids	18051000	11867000	13911000	45086000	48620000	44564000	1.2332	3.15476	1.65753	up
Cmzp023	LysoPC 20:2	Lipids_Glycerophospholipids	1403300	1253500	1087000	19934000	19445000	18875000	1.25899	15.5601	3.95978	up
Cmzp024	LysoPC 20:2 (2n isomer2)	Lipids_Glycerophospholipids	2151400	1978700	1745400	28637000	27996000	26949000	1.25961	14.2255	3.83041	up
Cmzp025	LysoPC 20:1	Lipids_Glycerophospholipids	317840	305190	286580	8683900	9509600	9647300	1.26079	30.6074	4.93581	up
Cmzp026	LysoPC 20:1 (2n isomer)	Lipids_Glycerophospholipids	328240	318470	261330	9524200	9548400	9548600	1.25981	31.5198	4.97818	up
Cmzp029	LysoPC 22:5	Lipids_Glycerophospholipids	14355000	9083800	11832000	32921000	33168000	34035000	1.22377	2.83872	1.50524	up
Cmzp030	LysoPC 22:5 (2n isomer1)	Lipids_Glycerophospholipids	13755000	9251000	11196000	31854000	32818000	32922000	1.23271	2.85346	1.51271	up
Cmzp031	LysoPC 22:5 (2n isomer2)	Lipids_Glycerophospholipids	14892000	9032100	11958000	32899000	32856000	32732000	1.21489	2.74474	1.45667	up
Cmzp032	LysoPC 22:5 (2n isomer3)	Lipids_Glycerophospholipids	14747000	8873800	11110000	31983000	32832000	33526000	1.21486	2.83152	1.50158	up
Cmzp033	LysoPC 22:4	Lipids_Glycerophospholipids	93653	48446	75838	980670	872310	871880	1.24746	12.503	3.6442	up
Cmzp034	LysoPC 22:4 (2n isomer1)	Lipids_Glycerophospholipids	86560	45080	72058	998420	859050	865640	1.24801	13.3684	3.74075	up
MEDN017	L-Pyroglutamic Acid	Amino Acid metabolomics	12336	11749	8522.6	29466	31300	33376	1.22578	2.88712	1.52963	up
MEDN027	3-N-Methyl-L-Histidine	Amino Acid metabolomics	92465	53649	80891	244340	212340	264120	1.20887	3.17526	1.66687	up
MEDN028	4-Hydroxy-L-Glutamic Acid	Amino Acid metabolomics	311150	196830	246740	93121	82736	64986	1.20689	0.319116	-1.64785	down
MEDN039	Glutathione Reducedform	Amino Acid metabolomics	639280	401510	418010	1093900	1100900	822590	1.13851	2.06841	1.04852	up
MEDN056	N-Acetyl-L-Leucine	Amino Acid metabolomics	56470	37493	50307	101300	99546	96740	1.19899	2.0627	1.04454	up
MEDN057	N-Acetyl-L-Tyrosine	Amino Acid metabolomics	16011	6462.7	3191.4	40418	38890	34020	1.09676	4.41565	2.14262	up
MEDN106	Taurochenodesoxycholic Acid	Bile Acids	53039	42258	46112	245140	232250	228030	1.25696	4.98851	2.31861	up
MEDN138	1-Methylhistidine	Amino Acid metabolomics	50497	25368	35041	116730	142280	183820	1.19243	3.99284	1.99742	up
MEDN152	Adenosine 5'-Diphosphate	Nucleotide metabolomics	2145100	1128700	1450700	8002000	9417900	8693300	1.2314	5.52719	2.46655	up
MEDN158	Deoxyguanosine	Nucleotide metabolomics	200430	120160	152700	441350	440700	422780	1.21284	2.75694	1.46307	up
MEDN161	Guanosine 3',5'-Cyclic Monophosphate	Nucleotide metabolomics	120020	57652	73124	43369	38279	26174	1.0578	0.429919	-1.21786	down
MEDN162	Guanosine Monophosphate	Nucleotide metabolomics	260680	202610	229260	723030	651730	577880	1.24135	2.81949	1.49544	up
MEDN163	Hypoxanthine	Nucleotide metabolomics	878350	612310	725810	2352800	2479700	1890800	1.2289	3.03334	1.60091	up
MEDN170	Uridine 5’-Diphosphate	Nucleotide metabolomics	320060	183430	305610	1202100	1284400	1350100	1.23105	4.74181	2.24544	up
MEDN171	Uridine	Nucleotide metabolomics	318260	216820	242310	819680	781770	713520	1.23224	2.97787	1.57428	up
MEDN198	Citric Acid	Amino Acid metabolomics	3845800	2021000	2771900	14639000	15982000	16583000	1.23197	5.46425	2.45002	up
MEDN200	L-Malic Acid	Amino Acid metabolomics	1648800	1808700	1771700	3990600	3871600	3508700	1.25394	2.1745	1.12068	up
MEDN245	Pantothenate	CoOthersEnzyme Factor & vitamin	929300	597750	786420	1875900	2052500	1868100	1.21502	2.50554	1.32512	up
MEDN283	2-Hydroxybutanoic Acid	Organic Acid And Its Derivatives	187650	109240	116310	381450	348840	302620	1.17442	2.49978	1.3218	up
MEDN285	2-Methylsuccinic Acid	Organic Acid And Its Derivatives	18035000	11090000	13919000	43943000	43870000	43237000	1.22435	3.04456	1.60623	up
MEDN314	Glutaric Acid	Organic Acid And Its Derivatives	19627000	11574000	15205000	49031000	42261000	43663000	1.21119	2.90814	1.5401	up
MEDN317	Hippuric Acid	Amino Acid metabolomics	81849	52891	68931	213870	208570	176940	1.22385	2.94288	1.55723	up
MEDN321	Kinic Acid	Organic Acid And Its Derivatives	333690	208200	179800	1885500	1749400	1395300	1.23337	6.97003	2.80116	up
MEDN325	L-Lactic Acid	Organic Acid And Its Derivatives	74899	67581	68175	377960	388100	350620	1.26003	5.30099	2.40626	up
MEDN335	Methylmalonic Acid	Organic Acid And Its Derivatives	4326300	2507500	2986500	8786400	7278300	6843200	1.1676	2.33271	1.22201	up
MEDN336	N'-Formylkynurenine	Organic Acid And Its Derivatives	8316.6	5801.5	4327.6	25144	18181	18867	1.18819	3.37163	1.75344	up
MEDN368	Lysope 14:0	Lipids_Glycerophospholipids	268400	202560	244480	1252800	1256100	1300800	1.25554	5.32497	2.41277	up
MEDN373	LipoxinA4 [5S,6R,15S-trihydroxy-7E,9E,11Z,13E-eicosatetraenoic acid]	Oxidized lipid	80339	46486	62092	16768	18439	16216	1.22201	0.272199	-1.87727	down
MEDN378	γ-Linolenic Acid(C18:3N6)	Lipids_Fatty Acids	70167	47145	66289	134820	136490	122440	1.20068	2.1446	1.10071	up
MEDN400	Α-Linolenic Acid(C18:3N3)	Lipids_Fatty Acids	79521	52052	72047	199040	181350	186950	1.2247	2.78627	1.47833	up
MEDN413	Ethylmalonate	Organic Acid And Its Derivatives	108780	58862	101040	312280	303160	274590	1.20428	3.31258	1.72795	up
MEDN419	Uridine 5-Monophosphate	Nucleotide metabolomics	15263000	9722200	9863600	6213700	5110900	5237100	1.1568	0.475244	-1.07326	down
MEDN434	Β-Pseudouridine	Nucleotide metabolomics	28913	14653	37331	54805	59374	94266	1.055	2.57667	1.36551	up
MEDN480	Dl-Glyceraldehyde3-Phosphate	Organic Acid And Its Derivatives	3870600	3262800	3721000	12816000	11015000	16031000	1.23832	3.67243	1.87673	up
MEDN485	D-Fructose-1,6-Biphosphate-Trisodium Salt	Carbohydrate metabolomics	1287100	1047200	1233800	6209900	6199300	7166000	1.25586	5.48617	2.4558	up
MEDN491	9-HOTrE [9S-hydroxy-10E,12Z,15Z-octadecatrienoic acid]	Oxidized lipid	12385	13154	8938.4	28752	22993	29528	1.19066	2.35728	1.23713	up
MEDN496	N-Acetylmethionine	Amino Acid metabolomics	15530	5507.2	10319	35721	34187	41880	1.14796	3.5651	1.83394	up
MEDN498	Ribulose-5-Phosphate	Carbohydrate metabolomics	4495800	3326400	3704200	8713100	8794500	7048500	1.21016	2.13042	1.09114	up
MEDN502	2-Deoxyribose 1-Phosphate	Carbohydrate metabolomics	1823500	1403200	1455100	3344200	3155100	3399700	1.22857	2.11436	1.08022	up
MEDN531	D-Glucarate	Carbohydrate metabolomics	15742	12007	12370	21434	39868	27673	1.12039	2.21778	1.14911	up
MEDN533	Xanthosine	Nucleotide metabolomics	111430	70459	47285	2084400	1961000	1391600	1.24184	23.7243	4.5683	up
MEDN536	estrone 3-sulfate	Hormones	9507.2	4937.5	5559.9	22806	18760	16281	1.16707	2.89168	1.53191	up
MEDN537	ADP-ribose	Nucleotide metabolomics	8270600	6319300	6670100	2512200	2332700	2437000	1.24705	0.342516	-1.54575	down
MEDN553	2-Methylbenzoic acid	Benzene and substituted derivatives	101380	77576	77540	353620	295000	251260	1.23449	3.50836	1.8108	up
MEDN579	N-lactoyl-phenylalanine	Amino Acid metabolomics	8483.1	4062.9	6445.1	40316	35091	31274	1.22327	5.61742	2.48991	up
MEDN593	D-(+)-Malic acid	Amino Acid metabolomics	986460	1153300	992140	2604200	2008000	2235100	1.22736	2.18631	1.1285	up
MEDN602	deoxyguanosine 5'-monophosphate (dGMP)	Nucleotide metabolomics	3318900	1830100	2373500	5531300	4656100	4895400	1.12908	2.00502	1.00362	up
MEDN624	5'-Adenylyl sulfate (APS)	Nucleotide metabolomics	3498100	1690700	2265100	13794000	13287000	12420000	1.22398	5.29937	2.40582	up
MEDN641	Ribose 1-phosphate	Carbohydrate metabolomics	2020400	1275900	1657200	3701000	3559900	3289100	1.1899	2.12981	1.09072	up
MEDN657	D-Xylulose 5-phosphate	Carbohydrate metabolomics	8309900	5896200	6565600	15998000	17293000	15467000	1.22467	2.34733	1.23102	up
MEDN662	Gamma-Glu-Leu	Organic Acid And Its Derivatives	561590	332800	464640	1294400	1204800	1196400	1.20838	2.71929	1.44323	up
MEDN741	Methanesulfonic acid	Others	522610	380150	417510	1869700	1578700	1624700	1.24548	3.84247	1.94203	up
MEDN759	(±)5-HEPE [(±)-5-hydroxy-6E,8Z,11Z,14Z,17Z-eicosapentaenoic acid]	Oxidized lipid	113120	70899	84478	35471	30491	29983	1.21223	0.357341	-1.48463	down
MEDN765	11,12-EET [(±)11,(12)-epoxy-5Z,8Z,14Z-eicosatrienoic acid]	Oxidized lipid	450640	254320	337430	1073500	1020800	987570	1.20849	2.95654	1.56391	up
MEDN769	14(S)-HDHA [14S-hydroxy-4Z,7Z,10Z,12E,16Z,19Z-docosahexaenoic acid]	Oxidized lipid	272800	155610	211300	86003	82755	81911	1.18757	0.391848	-1.35163	down
MEDN771	15-oxoETE [15-oxo-5Z,8Z,11Z,13E-eicosatetraenoic acid]	Oxidized lipid	468940	315530	443860	985070	877040	1099800	1.20343	2.41133	1.26983	up
MEDN776	5(S),15(S)-DiHETE [5S,15S-dihydroxy-6E,8Z,10Z,13E-eicosatetraenoic acid]	Oxidized lipid	57791	33040	45135	9998.3	9363	6622.6	1.22159	0.191106	-2.38756	down
MEDN779	5-HETrE [5S-hydroxy-6E,8Z,11Z-eicosatrienoic acid]	Oxidized lipid	36748	23428	27982	93808	86597	94041	1.22798	3.11312	1.63836	up
MEDN782	8,9-EET [(±)8,9-epoxy-5Z,11Z,14Z-eicosatrienoic acid]	Oxidized lipid	24842	21343	31169	111670	94916	126600	1.24092	4.30729	2.10678	up
MEDN791	PGD1 [9α,15S-dihydroxy-11-oxo-prost-13E-en-1-oic acid]	Oxidized lipid	21151	12496	14548	83514	78411	64894	1.23208	4.70628	2.23459	up
MEDN792	PGE1 [9-oxo-11α,15S-dihydroxy-prost-13E-en-1-oic acid]	Oxidized lipid	65606	48362	48457	245210	254560	225460	1.24837	4.46501	2.15866	up
MEDN793	PGE2 [9-oxo-11α,15S-dihydroxy-prosta-5Z,13E-dien-1-oic acid]	Oxidized lipid	514920	303370	401720	1917200	1988700	1708500	1.23652	4.60193	2.20224	up
MEDN818	N-acetyl-beta-alanine	Amino Acid metabolomics	193050	141300	138430	321410	349570	315420	1.20619	2.08638	1.061	up
MEDN822	Cysteine glutathione disulfide	Amino Acid metabolomics	322800	272860	280710	1078000	921550	859970	1.2493	3.26291	1.70616	up
MEDP010	L-Arginine	Amino Acid metabolomics	5729700	5211300	5423400	1922600	2732700	2131800	1.22515	0.414748	-1.26969	down
MEDP028	(5-L-Glutamyl)-L-Amino Acid	Amino Acid metabolomics	69634	64225	65049	185490	201760	129630	1.214	2.59859	1.37773	up
MEDP035	5-Hydroxy-L-Tryptophan	Amino Acid metabolomics	57305	34861	44679	172530	153380	170100	1.22989	3.62461	1.85783	up
MEDP039	Betaine	Tryptamine, Choline, pigment	17088000	11742000	14794000	48176000	50930000	47978000	1.24214	3.37163	1.75345	up
MEDP043	Glutathione Oxidized	Amino Acid metabolomics	2640500	1549200	2420800	4719400	4343000	5221100	1.15661	2.16073	1.11152	up
MEDP051	L-Cystathionine	Amino Acid metabolomics	1591400	1264700	1381000	10639000	12253000	12325000	1.2574	8.31158	3.05512	up
MEDP052	L-Cysteine	Amino Acid metabolomics	31524	33510	36094	73207	82132	62817	1.23462	2.15723	1.10918	up
MEDP086	Urea	Amino Acid metabolomics	43679	46806	40708	154080	198520	156110	1.25022	3.87757	1.95515	up
MEDP115	1,4-Dihydro-1-Methyl-4-Oxo-3-Pyridinecarboxamide	Pyridine And Pyridine Derivatives	249840	170160	191630	426610	484200	386440	1.19374	2.12097	1.08473	up
MEDP143	Biotin	CoOthersEnzyme Factor & vitamin	187060	111030	127860	72522	71501	39180	1.07911	0.430104	-1.21724	down
MEDP150	2'-Deoxyinosine	Nucleotide metabolomics	9626.4	8337.1	22141	57384	38277	57390	1.14799	3.8163	1.93218	up
MEDP155	5-Methylcytosine	Nucleotide metabolomics	37007	11393	17506	79259	90403	60076	1.11167	3.48584	1.80151	up
MEDP158	8-Hydroxyguanosine	Nucleotide metabolomics	64226	53631	65480	123580	116640	169920	1.1939	2.23708	1.16162	up
MEDP160	Adenosine	Nucleotide metabolomics	16628000	10189000	13312000	45394000	48057000	44902000	1.2306	3.44771	1.78564	up
MEDP176	Thymidine	Nucleotide metabolomics	39256	25026	18301	69907	61360	41838	1.02896	2.09613	1.06773	up
MEDP177	Thymine	Nucleotide metabolomics	103290	57708	56129	186910	168820	172270	1.15381	2.43176	1.282	up
MEDP178	Uracil	Nucleotide metabolomics	160180	142690	148750	501180	630550	389980	1.23003	3.36945	1.75251	up
MEDP212	N-Acetyl-5-Hydroxytryptamine	Tryptamine, Choline, pigment	30377	20350	29626	54676	65698	48172	1.1679	2.09757	1.06872	up
MEDP251	Trigonelline	CoOthersEnzyme Factor & vitamin	10538	10436	7533.8	41692	55226	55517	1.24014	5.34713	2.41877	up
MEDP275	Indole-3-Acetic Acid	Indole And Its Derivatives	594060	455010	526650	1137000	946510	1148000	1.21472	2.05081	1.0362	up
MEDP336	Lysopc 14:0	Lipids_Glycerophospholipids	13127000	9201000	10645000	31223000	30314000	32179000	1.23668	2.8422	1.50701	up
MEDP357	Urocanic Acid	Organic Acid And Its Derivatives	48009	32843	17143	242280	222760	258530	1.20578	7.38374	2.88435	up
MEDP373	N-Acetylglycine	Amino Acid metabolomics	33035000	25417000	28505000	84553000	83213000	76971000	1.24702	2.81446	1.49286	up
MEDP375	Deoxyadenosine	Nucleotide metabolomics	284050	201840	260870	831070	750260	850590	1.24086	3.25663	1.70338	up
MEDP378	N6-Succinyl Adenosine	Nucleotide metabolomics	725340	435340	481170	1721500	1743300	1508800	1.21177	3.02927	1.59897	up
MEDP403	Deoxycytidine	Nucleotide metabolomics	452440	343410	359390	911730	1032500	724950	1.20295	2.3105	1.2082	up
MEDP494	Lysopc 15:0	Lipids_Glycerophospholipids	4306700	3189200	3436000	20767000	19809000	20485000	1.25399	5.58558	2.48171	up
MEDP510	Acetyl-L-carnitine (CAR C2:0)	Carnitine	3540900	2131900	3780000	8078600	7985400	7977600	1.18486	2.54333	1.34672	up
MEDP529	Indole-3-acetamide	Indole And Its Derivatives	9	9	9	126460	136040	138030	1.2616	14834.4	13.8567	up
MEDP537	PAF C-16	Lipids_others	33589000	25436000	27723000	71788000	105830000	113700000	1.21422	3.35821	1.74769	up
MEDP538	LTD4 [5S-hydroxy-6R-(S-cysteinylglycinyl)-7E,9E,11Z,14Z-eicosatetraenoic acid]	Lipids_Fatty Acids	11333000	8786500	9764400	26481000	24849000	27158000	1.24453	2.62643	1.3931	up
MEDP551	N-METHYL (-)EPHEDRINE	Benzene and substituted derivatives	210790	134220	179030	539030	540350	454320	1.22171	2.92668	1.54927	up
MEDP577	Isobutyryl carnitine (CAR C4:0)	Carnitine	265330	102070	167050	825480	836720	618700	1.17854	4.26775	2.09348	up
MEDP583	Asp-Phe methyl ester	Others	1111000	551770	644860	1901200	2051400	1624400	1.13572	2.41677	1.27308	up
MEDP601	Spermidine	Amines	996120	229510	629820	1855700	1711800	1471000	1.00927	2.71551	1.44123	up
MEDP664	L- tyrosine methyl ester	Amino Acid metabolomics	73280	47790	54429	176960	157810	142610	1.21563	2.72013	1.44368	up
MEDP691	Ethylparaben	Benzene and substituted derivatives	339410	185440	218880	545340	552060	550880	1.15484	2.21623	1.14811	up
MEDP821	6-Methylnicotinamide	Pyridine And Pyridine Derivatives	351240	297340	358220	769340	659930	766010	1.23787	2.18045	1.12463	up
MEDP859	glycylphenylalanine	Amino Acid metabolomics	377250	240410	279720	151650	116790	148730	1.1681	0.464876	-1.10508	down
MEDP863	proline betaine	Organic Acid And Its Derivatives	39534000	29543000	32951000	84172000	90429000	87437000	1.2403	2.56829	1.36081	up
MEDP874	tryptophan betaine	Amino Acid metabolomics	9	9	9	174610	146990	126950	1.26165	16613	14.02	up
MEDP879	N-Methyl-D-Aspartic Acid	Amino Acid metabolomics	136560	81648	110640	555900	599970	575280	1.24215	5.26429	2.39624	up
MWS0755-N	cis-11,14,17-Eicosatrienoic Acid(C2-:3)	Bile Acids	11491000	8429000	10530000	21933000	19999000	21628000	1.22153	2.08736	1.06168	up
MWS0965-N	24,25-Dihydrolanosterol	Lipids_others	28839	7956.4	16131	2969.3	2608	2263.6	1.15939	0.148147	-2.7549	down
MWS2383-N	2-hydroxystearate	Lipids_Fatty Acids	45125	24907	40894	116170	122540	127100	1.20867	3.29778	1.7215	up
Wmjp0837	Indole-3-carboxyaldehyde	Indole And Its Derivatives	99178	61502	90694	181060	172560	172120	1.17803	2.09147	1.06451	up

## Sheet: S3-3 vs S1-3
Index	Compounds	Class	S1-3a	S1-3b	S1-3c	S3-3a	S3-3b	S3-3c	VIP	Fold_Change	Log2FC	Type
MEDP529	Indole-3-acetamide	Indole And Its Derivatives	9	9	9	116810	83262	96451	1.16535	10982.3	13.4229	up
MEDP874	tryptophan betaine	Amino Acid metabolomics	9	9	9	97781	82541	96185	1.16556	10241	13.3221	up
Cmzn020	LysoPE 20:2	Lipids_Glycerophospholipids	17744	9165.2	2067.1	798310	794370	747810	1.12456	80.7726	6.33579	up
Cmzp026	LysoPC 20:1 (2n isomer)	Lipids_Glycerophospholipids	89911	67701	70191	4296500	4556500	4216800	1.1644	57.3733	5.84231	up
Cmzp025	LysoPC 20:1	Lipids_Glycerophospholipids	121270	79643	68810	4133400	4061900	3910300	1.161	44.8816	5.48805	up
Cmzp008	LysoPC 18:3 (2n isomer2)	Lipids_Glycerophospholipids	263870	187750	184940	8648200	9134600	8511100	1.16329	41.3062	5.36829	up
Cmzp007	LysoPC 18:3 (2n isomer1)	Lipids_Glycerophospholipids	375630	272660	278470	8474900	9071900	8959400	1.1635	28.6009	4.83799	up
Cmzp023	LysoPC 20:2	Lipids_Glycerophospholipids	468740	350950	254700	10057000	9754700	9406200	1.15879	27.1949	4.76526	up
Cmzp024	LysoPC 20:2 (2n isomer2)	Lipids_Glycerophospholipids	694840	570770	414180	14665000	15559000	14236000	1.16016	26.4676	4.72616	up
Cmhp015	CAR ph-C1	Carnitine	14679	10426	11790	303400	334430	327470	1.16354	26.1634	4.70948	up
Cmzp013	LysoPC 18:1 (2n isomer)	Lipids_Glycerophospholipids	4012500	2830600	2733900	61330000	59882000	61795000	1.16188	19.109	4.25618	up
Cmzp012	LysoPC 18:1	Lipids_Glycerophospholipids	4130100	3750400	2752700	63473000	61029000	64284000	1.16115	17.7544	4.1501	up
Cmzn017	LysoPE 20:3	Lipids_Glycerophospholipids	203840	151760	117770	2806400	2671700	2411100	1.15741	16.666	4.05884	up
Cmzn018	LysoPE 20:3(2n isomer1)	Lipids_Glycerophospholipids	208040	163410	129890	2750800	2690000	2430800	1.15916	15.7011	3.9728	up
Cmzn006	LysoPE 18:3 (2n isomer)	Lipids_Glycerophospholipids	146710	106350	81197	1711200	1732300	1685200	1.15655	15.3436	3.93956	up
Cmzn008	LysoPE 18:2 (2n isomer)	Lipids_Glycerophospholipids	280140	270040	197590	3883200	3641100	3791500	1.16133	15.1327	3.9196	up
MEDP051	L-Cystathionine	Amino Acid metabolomics	879350	725830	775000	11871000	11819000	11920000	1.16481	14.9611	3.90314	up
Cmzn010	LysoPE 18:1 (2n isomer)	Lipids_Glycerophospholipids	148230	108940	81830	1027700	1548600	1235400	1.14816	11.244	3.49108	up
MEDN579	N-lactoyl-phenylalanine	Amino Acid metabolomics	9834.8	8669.8	6085.7	90250	90798	91913	1.15711	11.1004	3.47253	up
Cmzp010	LysoPC 18:2	Lipids_Glycerophospholipids	3345700	2662900	1616900	27770000	28380000	27489000	1.14729	10.9683	3.45527	up
Cmzp011	LysoPC 18:2 (2n isomer)	Lipids_Glycerophospholipids	3351900	2818400	1939600	27546000	30240000	27944000	1.15407	10.571	3.40204	up
MEDN741	Methanesulfonic acid	Others	352390	388090	305600	3242800	3423600	3422700	1.16276	9.64467	3.26973	up
MEDP035	5-Hydroxy-L-Tryptophan	Amino Acid metabolomics	16063	14654	11786	125140	108550	139790	1.15941	8.78714	3.13539	up
MEDN533	Xanthosine	Nucleotide metabolomics	51126	52005	70247	489840	479890	448690	1.15984	8.18108	3.03229	up
MEDN485	D-Fructose-1,6-Biphosphate-Trisodium Salt	Carbohydrate metabolomics	1526700	1451300	1356400	10984000	13614000	10400000	1.16032	8.07447	3.01337	up
MEDN496	N-Acetylmethionine	Amino Acid metabolomics	16012	11051	10797	96258	98129	104130	1.15721	7.88476	2.97907	up
Cmzp033	LysoPC 22:4	Lipids_Glycerophospholipids	53224	42252	18748	250610	305870	277930	1.112	7.30503	2.86889	up
MEDP601	Spermidine	Amines	668800	394890	323710	3158100	3385000	3435300	1.13973	7.19216	2.84642	up
MEDN017	L-Pyroglutamic Acid	Amino Acid metabolomics	16652	22242	16392	121220	138970	116510	1.15605	6.81366	2.76843	up
MEDN162	Guanosine Monophosphate	Nucleotide metabolomics	313570	221020	161010	1624000	1676900	1299800	1.13787	6.614	2.72552	up
Cmzp015	LysoPC 18:0 (2n isomer)	Lipids_Glycerophospholipids	10809000	9172300	8205500	62221000	62967000	59223000	1.16089	6.54246	2.70983	up
Cmzp014	LysoPC 18:0	Lipids_Glycerophospholipids	11030000	8958600	7939600	61578000	59466000	57905000	1.15913	6.40747	2.67975	up
Cmzp034	LysoPC 22:4 (2n isomer1)	Lipids_Glycerophospholipids	55782	44679	28806	259120	275600	254240	1.13934	6.10334	2.6096	up
MEDP537	PAF C-16	Lipids_others	13280000	10950000	9608600	69448000	70776000	65095000	1.15853	6.0676	2.60113	up
MEDN152	Adenosine 5'-Diphosphate	Nucleotide metabolomics	1658000	1115600	918100	7166900	8121100	6495600	1.14088	5.9007	2.56089	up
MEDP551	N-METHYL (-)EPHEDRINE	Benzene and substituted derivatives	124510	98051	88762	601300	612130	593040	1.15805	5.80256	2.53669	up
MEDN317	Hippuric Acid	Amino Acid metabolomics	51062	35443	39666	248180	217270	249810	1.15647	5.66897	2.50309	up
MEDP151	2-Hydroxy-6-Aminopurine	Nucleotide metabolomics	166070	182180	148960	726780	890020	1125100	1.1508	5.51457	2.46325	up
MEDN368	Lysope 14:0	Lipids_Glycerophospholipids	125850	98860	86417	538770	600670	573970	1.15527	5.50711	2.46129	up
MEDP275	Indole-3-Acetic Acid	Indole And Its Derivatives	348300	288530	319660	1740300	1764800	1720900	1.16349	5.46373	2.44989	up
MEDP691	Ethylparaben	Benzene and substituted derivatives	321570	268360	224390	1415800	1490300	1529400	1.15663	5.44688	2.44543	up
Cmmn9102	2-hydroxyhexadecanoic acid	Lipids_Fatty Acids	163230	120470	130850	746920	727720	778540	1.15957	5.43524	2.44234	up
MEDP158	8-Hydroxyguanosine	Nucleotide metabolomics	45382	36599	30858	176030	210780	221380	1.152	5.38989	2.43026	up
MEDP086	Urea	Amino Acid metabolomics	23655	39648	55722	190050	196800	250660	1.11579	5.3561	2.42118	up
Wmjp0837	Indole-3-carboxyaldehyde	Indole And Its Derivatives	63559	52119	41851	268380	314200	247900	1.14851	5.27192	2.39833	up
MEDN624	5'-Adenylyl sulfate (APS)	Nucleotide metabolomics	2734100	2014900	1441400	10359000	12860000	9412400	1.13056	5.27129	2.39816	up
MEDN602	deoxyguanosine 5'-monophosphate (dGMP)	Nucleotide metabolomics	1996300	1710900	1018100	7925800	8426800	7882000	1.13103	5.12869	2.35859	up
MEDN434	Β-Pseudouridine	Nucleotide metabolomics	24698	13370	18442	89467	91915	106850	1.13964	5.10055	2.35065	up
MEDN158	Deoxyguanosine	Nucleotide metabolomics	235070	137710	143050	819960	844340	958460	1.14074	5.08454	2.34612	up
Cmzn027	LysoPE 22:4(2n isomer1)	Lipids_Glycerophospholipids	17189	16413	10211	75946	73676	67983	1.13968	4.96668	2.31228	up
MEDN027	3-N-Methyl-L-Histidine	Amino Acid metabolomics	36985	31375	33049	153630	176980	161730	1.16177	4.85499	2.27947	up
MEDN153	Adenosine 5'-Monophosphate	Nucleotide metabolomics	584870	562600	537560	2626700	2825000	2713100	1.16436	4.84549	2.27664	up
MEDP313	Guanidineacetic Acid	Organic Acid And Its Derivatives	34402	29754	23945	137090	153600	134620	1.153	4.82753	2.27128	up
MEDP155	5-Methylcytosine	Nucleotide metabolomics	39938	17318	30533	127070	154980	134960	1.11383	4.75014	2.24797	up
MEDN662	Gamma-Glu-Leu	Organic Acid And Its Derivatives	648750	432620	423190	2248500	2437800	2431300	1.1478	4.73069	2.24205	up
MEDN325	L-Lactic Acid	Organic Acid And Its Derivatives	106800	67829	104420	425050	419750	453520	1.14664	4.65266	2.21806	up
MEDP583	Asp-Phe methyl ester	Others	926860	700800	619140	3405800	3507600	3534800	1.1521	4.65026	2.21731	up
MEDN056	N-Acetyl-L-Leucine	Amino Acid metabolomics	29682	31646	38890	153600	143850	150260	1.1589	4.46736	2.15942	up
MEDN336	N'-Formylkynurenine	Organic Acid And Its Derivatives	8461.3	7837.8	4247.7	24723	36939	29858	1.10676	4.45422	2.15517	up
MEDN455	Guanine	Nucleotide metabolomics	15587	13342	7866	42287	66529	50406	1.1048	4.32727	2.11346	up
MEDN321	Kinic Acid	Organic Acid And Its Derivatives	367840	219830	167590	1378200	1003700	874690	1.09719	4.31188	2.10832	up
Cmzp018	LysoPC 20:4	Lipids_Glycerophospholipids	14008000	11653000	9012700	48609000	49202000	51405000	1.14807	4.30343	2.10549	up
MEDP039	Betaine	Tryptamine, Choline, pigment	13932000	12338000	10986000	48261000	57159000	54390000	1.15748	4.28951	2.10081	up
MEDN822	Cysteine glutathione disulfide	Amino Acid metabolomics	486710	372660	357520	1510300	1616500	2070300	1.14731	4.27081	2.09451	up
MEDN480	Dl-Glyceraldehyde3-Phosphate	Organic Acid And Its Derivatives	4754100	4903600	4094900	17040000	22802000	18623000	1.15253	4.2512	2.08787	up
MEDN004	L-Cystine	Amino Acid metabolomics	14870	12996	15970	68679	58343	59310	1.15924	4.25066	2.08769	up
MEDP577	Isobutyryl carnitine (CAR C4:0)	Carnitine	316790	162910	184470	984390	906870	913250	1.12447	4.22258	2.07812	up
MEDN818	N-acetyl-beta-alanine	Amino Acid metabolomics	226440	165720	111760	669350	755580	650800	1.11897	4.11917	2.04235	up
Cmzp004	LysoPC 16:1 (2n isomer)	Lipids_Glycerophospholipids	28131000	20805000	16394000	85557000	90412000	86406000	1.13755	4.01615	2.00581	up
MEDN057	N-Acetyl-L-Tyrosine	Amino Acid metabolomics	10623	6931.2	5730	23617	34199	34081	1.11192	3.94675	1.98067	up
Cmzp019	LysoPC 20:4 (2n isomer)	Lipids_Glycerophospholipids	9439400	7886200	6068700	28970000	32435000	30843000	1.14436	3.94318	1.97936	up
MEDP494	Lysopc 15:0	Lipids_Glycerophospholipids	2333500	1822700	1418600	6825500	7662300	6811500	1.1378	3.82064	1.93381	up
MEDN171	Uridine	Nucleotide metabolomics	261500	262790	196110	820750	926070	985730	1.14963	3.7931	1.92338	up
MEDN283	2-Hydroxybutanoic Acid	Organic Acid And Its Derivatives	155380	104510	97044	423890	441160	470750	1.13863	3.74243	1.90397	up
MEDP849	Nα-Acetyl-L-glutamine	Amino Acid metabolomics	53509	99301	65339	311670	231060	267860	1.11447	3.71576	1.89366	up
MEDP115	1,4-Dihydro-1-Methyl-4-Oxo-3-Pyridinecarboxamide	Pyridine And Pyridine Derivatives	213260	200600	177690	897190	657940	639820	1.14534	3.71051	1.89162	up
MEDP177	Thymine	Nucleotide metabolomics	119600	85077	83962	389870	331720	343620	1.14556	3.69046	1.8838	up
MEDP176	Thymidine	Nucleotide metabolomics	71727	62017	40499	251440	185090	202400	1.11759	3.66689	1.87456	up
MEDP664	L- tyrosine methyl ester	Amino Acid metabolomics	123090	88866	81260	372980	338450	354080	1.14394	3.63387	1.86151	up
MEDN656	Indoleacetaldehyde	Indole And Its Derivatives	329420	266760	286190	1047700	1051100	1086900	1.16078	3.61039	1.85215	up
MEDP212	N-Acetyl-5-Hydroxytryptamine	Tryptamine, Choline, pigment	34592	32181	30296	114380	115360	117320	1.16344	3.57539	1.8381	up
MEDP456	Piperidine	Benzene and substituted derivatives	731580	453880	407240	1911800	1884300	1881000	1.12416	3.56445	1.83368	up
Cmhp127	CAR C22:2-OH(3)	Carnitine	23738	19627	15681	70741	72150	66284	1.14397	3.54258	1.8248	up
MEDP373	N-Acetylglycine	Amino Acid metabolomics	26044000	23170000	22747000	85316000	87048000	82361000	1.1624	3.53976	1.82365	up
MEDN170	Uridine 5’-Diphosphate	Nucleotide metabolomics	362540	220000	181820	938820	966380	787810	1.10559	3.52322	1.8169	up
MEDN106	Taurochenodesoxycholic Acid	Bile Acids	73212	50240	63630	231550	207690	213990	1.14825	3.49168	1.80392	up
MEDP298	6-Aminocaproic Acid	Organic Acid And Its Derivatives	6980400	5360500	4524500	19095000	18794000	20084000	1.14242	3.43739	1.78131	up
MEDN138	1-Methylhistidine	Amino Acid metabolomics	34545	26825	20354	75323	109070	94675	1.11506	3.41476	1.77178	up
Cmzn011	LysoPE 18:0	Lipids_Glycerophospholipids	11016000	10607000	12045000	37402000	39993000	37014000	1.1624	3.39815	1.76475	up
MEDP745	Creosol	Phenols And Its Derivatives	347450	307170	284150	990690	1088300	1105800	1.15865	3.39251	1.76235	up
Cmzn015	LysoPE 20:4	Lipids_Glycerophospholipids	6191300	4906000	4150300	17401000	17636000	16662000	1.14473	3.39063	1.76155	up
Cmhp003	CAR C3:0	Carnitine	901060	683140	658220	2405400	2496400	2642300	1.15027	3.36427	1.75029	up
Cmzn016	LysoPE 20:4(2n isomer1)	Lipids_Glycerophospholipids	6276700	4949400	4331900	17594000	17530000	16703000	1.14678	3.33121	1.73605	up
MEDN198	Citric Acid	Amino Acid metabolomics	3655400	2057400	1688500	7215700	8927900	8370500	1.08835	3.31213	1.72776	up
MEDP178	Uracil	Nucleotide metabolomics	158950	179310	144290	338810	626750	631040	1.09234	3.30867	1.72625	up
Cmzn012	LysoPE 18:0 (2n isomer)	Lipids_Glycerophospholipids	11452000	10554000	12103000	36647000	39190000	36890000	1.16245	3.3049	1.72461	up
MEDP431	Hordenine	Benzene and substituted derivatives	46528	45347	34961	127940	146950	136820	1.1483	3.246	1.69866	up
MEDP863	proline betaine	Organic Acid And Its Derivatives	30185000	28985000	25821000	93620000	92211000	89437000	1.1611	3.23879	1.69545	up
MEDP296	4-Guanidinobutyric Acid	Organic Acid And Its Derivatives	5574600	4941800	4374900	15240000	16147000	16653000	1.15641	3.22604	1.68977	up
MEDP821	6-Methylnicotinamide	Pyridine And Pyridine Derivatives	372000	283840	229580	580280	1201700	1034300	1.05699	3.18073	1.66936	up
Cmhp123	CAR C22:1	Carnitine	43103	40905	42830	133810	135900	128140	1.16435	3.13668	1.64924	up
MEDP457	5-Aminolevulinate	Organic Acid And Its Derivatives	48064	43861	27103	114700	136680	121900	1.10955	3.13607	1.64896	up
MEDP244	All-Trans-13,14-Dihydroretinol	CoOthersEnzyme Factor & vitamin	33786	28453	23987	85389	100300	81284	1.13994	3.0962	1.6305	up
MEDN209	Tryptamine	Tryptamine, Choline, pigment	38933	30024	31931	99005	102640	107550	1.15449	3.06474	1.61576	up
MEDP603	Cuminaldehyde	Others	151220	140480	134070	443830	416190	436720	1.16284	3.04563	1.60674	up
MEDP160	Adenosine	Nucleotide metabolomics	21599000	15720000	13725000	59153000	49282000	46509000	1.1245	3.0355	1.60193	up
Cmzp016	LysoPC 20:5 (2n isomer)	Lipids_Glycerophospholipids	2705800	2161000	1440400	6192100	6876400	6020300	1.10477	3.02651	1.59765	up
MEDN439	N-Acetylthreonine	Amino Acid metabolomics	40885	28870	20631	90615	101360	81388	1.09391	3.0244	1.59665	up
MEDP525	N-Acetyl-L-alanine	Amino Acid metabolomics	5500000	3945500	3682300	13208000	13187000	12656000	1.13726	2.97468	1.57273	up
Wmjp0649	(R)-(-)-2-Phenylglycinol	Amino Acid metabolomics	5479100	4540000	3513000	13802000	12992000	13080000	1.13363	2.94662	1.55906	up
Cmzp017	LysoPC 20:5	Lipids_Glycerophospholipids	2772100	2206600	1469700	6708300	6224800	6007400	1.10264	2.93724	1.55446	up
Cmhp106	CAR ph-C14	Carnitine	49541	29366	30609	106500	107760	104590	1.11559	2.91145	1.54174	up
MEDN140	2,6-Dihydroxypurine	Nucleotide metabolomics	605270	451650	567980	1653200	1681000	1391100	1.14279	2.90806	1.54005	up
Cmhp053	CAR C12:0	Carnitine	22160	10241	16478	45590	47053	48686	1.08299	2.89141	1.53177	up
MEDN304	Cinnamic Acid	Organic Acid And Its Derivatives	19391	17306	9412.5	42616	46509	43703	1.07684	2.88071	1.52642	up
MEDN659	Pyrophosphate	Organic Acid And Its Derivatives	1838200	1357200	1181900	4098200	4317600	4171200	1.13221	2.87552	1.52382	up
MEDN316	Guanidinoethyl Sulfonate	Organic Acid And Its Derivatives	8503.7	7157.5	10452	23225	24587	27173	1.13998	2.87154	1.52182	up
MEDP545	2-Pyrrolidinone	Benzene and substituted derivatives	784980	590930	518340	1764900	1933300	1725800	1.13317	2.8634	1.51773	up
MEDN245	Pantothenate	CoOthersEnzyme Factor & vitamin	883380	619420	655450	1947800	2107900	2012200	1.14023	2.81149	1.49134	up
Wmjp0774	ALANYL-dl-LEUCINE	Amino Acid metabolomics	79902	66279	55504	188730	177890	198660	1.14101	2.80279	1.48686	up
MEDP375	Deoxyadenosine	Nucleotide metabolomics	731920	612230	591370	2024700	1991600	1401000	1.12325	2.79889	1.48485	up
MEDP538	LTD4 [5S-hydroxy-6R-(S-cysteinylglycinyl)-7E,9E,11Z,14Z-eicosatetraenoic acid]	Lipids_Fatty Acids	6265300	5516300	4505700	15050000	15337000	15067000	1.14545	2.79076	1.48066	up
MWS2383-N	2-hydroxystearate	Lipids_Fatty Acids	32469	25548	21989	75187	74378	72522	1.13808	2.77588	1.47294	up
MEDP403	Deoxycytidine	Nucleotide metabolomics	873100	477150	484780	1526100	1856700	1603200	1.08289	2.71712	1.44208	up
MWS0402-N	trans-4-Hydroxy-D-proline	Amino Acid metabolomics	144660	99669	92807	301340	303140	306000	1.12548	2.70063	1.4333	up
MEDP123	Acetylcholine Chloride	Tryptamine, Choline, pigment	359040	332060	291780	870950	859690	919720	1.1563	2.69652	1.4311	up
MEDP631	Dimethyl fumarate	Aldehydes, ketones, esters	222030	229030	228550	525170	650080	653040	1.15322	2.6902	1.42772	up
MEDN160	Guanosine	Nucleotide metabolomics	33723000	25168000	25248000	73557000	77164000	74043000	1.14384	2.67134	1.41756	up
MEDN657	D-Xylulose 5-phosphate	Carbohydrate metabolomics	8376000	7093200	5897200	19479000	18577000	18943000	1.14138	2.66769	1.41559	up
MEDP052	L-Cysteine	Amino Acid metabolomics	58550	61947	40146	147530	139200	141490	1.12226	2.66566	1.41449	up
MEDN641	Ribose 1-phosphate	Carbohydrate metabolomics	1995100	1606900	1346500	4466400	4665000	4052700	1.13114	2.66426	1.41374	up
Cmzn004	LysoPE 16:0 (2n isomer)	Lipids_Glycerophospholipids	19927000	16802000	16598000	45873000	49524000	46291000	1.15573	2.65697	1.40978	up
MEDN498	Ribulose-5-Phosphate	Carbohydrate metabolomics	4648300	3963500	3731700	11202000	10828000	10760000	1.15503	2.65646	1.4095	up
MEDP297	5-Aminovaleric Acid	Organic Acid And Its Derivatives	100160	43242	39364	147150	150730	187610	1.01285	2.65635	1.40944	up
Cmzn014	LysoPE 20:5(2n isomer1)	Lipids_Glycerophospholipids	398480	303880	278780	870530	891450	830810	1.13747	2.64263	1.40197	up
MEDP250	Riboflavin	CoOthersEnzyme Factor & vitamin	239930	219130	185200	553390	572350	574740	1.15108	2.63943	1.40023	up
MEDN019	L-Tryptophan	Amino Acid metabolomics	1206200	812550	773080	2350300	2455200	2442400	1.12019	2.59611	1.37635	up
MEDP685	Methylcysteine	Amino Acid metabolomics	2493900	1772400	1622600	4902900	5069400	5293000	1.12501	2.59222	1.37419	up
MEDN753	(±)16-HETE [(±)16-hydroxy-5Z,8Z,11Z,14Z-eicosatetraenoic acid]	Oxidized lipid	10158	7127.5	6525.4	22891	18065	20537	1.11314	2.58256	1.3688	up
Cmzn003	LysoPE 16:0	Lipids_Glycerophospholipids	20709000	17350000	17023000	46230000	49254000	46194000	1.15437	2.57213	1.36296	up
MEDP205	L-Carnitine	Carnitine	462550	416810	417290	1052600	1124000	1148500	1.16116	2.56438	1.35861	up
Whmp0305	Oxypurinol	Nucleotide metabolomics	799690	701020	679970	1769100	2034400	1777300	1.15291	2.5592	1.35569	up
MEDN791	PGD1 [9α,15S-dihydroxy-11-oxo-prost-13E-en-1-oic acid]	Oxidized lipid	12794	10685	8443.2	23356	26655	30179	1.11599	2.51204	1.32886	up
MEDP883	2,4-Dihydroxypteridine	Pteridines and derivatives	24914	20230	15539	46031	52483	52961	1.11338	2.49617	1.31972	up
MEDP002	D-Homocysteine	Amino Acid metabolomics	38299	43530	51190	116200	116240	97912	1.13654	2.48349	1.31237	up
MEDP507	2-Hydroxycinnamic acid	Benzene and substituted derivatives	752760	657030	570390	1645900	1630700	1605400	1.1474	2.46543	1.30184	up
MEDN793	PGE2 [9-oxo-11α,15S-dihydroxy-prosta-5Z,13E-dien-1-oic acid]	Oxidized lipid	410200	281140	255940	744420	787070	800980	1.11214	2.46228	1.3	up
MEDN013	L-Isoleucine	Amino Acid metabolomics	93571	87688	79954	228200	204260	205980	1.15567	2.44414	1.28932	up
MEDP101	P-Coumaric Acid	Benzene and substituted derivatives	203500	96475	162370	362270	390120	371860	1.05594	2.43163	1.28192	up
Cmhp010	CAR C6:0	Carnitine	80309	61066	48810	145310	155920	161170	1.10904	2.43132	1.28174	up
MEDP510	Acetyl-L-carnitine (CAR C2:0)	Carnitine	4880800	4270800	3950600	11183000	10989000	9511500	1.14558	2.41818	1.27392	up
MEDP381	7-Methylguanine	Nucleotide metabolomics	14833000	11558000	10030000	27815000	30753000	28973000	1.12629	2.40359	1.26519	up
MEDN351	12-Hete	Lipids_Fatty Acids	1038200	779420	726420	2046100	2097800	1944200	1.13008	2.39308	1.25887	up
Cmzn013	LysoPE 20:5	Lipids_Glycerophospholipids	390220	315920	346570	857140	863250	787370	1.15178	2.38219	1.25229	up
Cmzn007	LysoPE 18:2	Lipids_Glycerophospholipids	56797	37361	39122	93365	130540	90710	1.07718	2.36056	1.23913	up
MEDP523	DL-Carnitine	Carnitine	2084000	1842800	1627800	4300400	4366300	4399600	1.14966	2.35234	1.2341	up
MEDP020	L-Methionine	Amino Acid metabolomics	9194000	7442200	7039000	18383000	19927000	17293000	1.13936	2.34858	1.23179	up
MEDP156	5-Methyluridine	Nucleotide metabolomics	379660	310900	242900	678080	790060	700530	1.10874	2.32326	1.21615	up
Cmhp087	CAR C15:DC*	Carnitine	41555	26043	22480	65940	67813	74521	1.07113	2.31215	1.20924	up
Cmhp011	CAR C6:0 Isomer1	Carnitine	66131	75650	60651	143910	163930	157080	1.14564	2.29667	1.19955	up
Cmhp020	CAR C6-OH(3)	Carnitine	55134	39038	33928	109220	90552	93976	1.09506	2.29311	1.19731	up
Cmhp077	CAR C16:1	Carnitine	62387	45700	47919	122490	131470	103480	1.11901	2.29119	1.1961	up
MEDP519	L-Norleucine	Amino Acid metabolomics	632750	512820	474850	1271900	1226600	1204700	1.14092	2.28533	1.1924	up
MEDP316	Homovanillic Acid	Organic Acid And Its Derivatives	3377400	2314300	2261800	5723900	6304100	6110900	1.11209	2.28062	1.18943	up
MEDN206	Citramalic Acid	Amino Acid metabolomics	65227	32501	68016	118800	128230	130320	1.02502	2.2767	1.18695	up
MEDP606	2-(3,4-dimethoxyphenyl)ethanamine	Amines	10395000	7667300	7062800	17506000	20974000	18193000	1.11125	2.25563	1.17353	up
MEDN569	DL-o-Tyrosine	Amino Acid metabolomics	1244400	1017700	910090	2454900	2440100	2249100	1.13432	2.2521	1.17127	up
MEDP036	5-Oxoproline	Amino Acid metabolomics	134780	123050	106540	266680	224900	323700	1.11487	2.23751	1.16189	up
MEDN782	8,9-EET [(±)8,9-epoxy-5Z,11Z,14Z-eicosatrienoic acid]	Oxidized lipid	18657	11978	18344	33746	39590	36044	1.09517	2.2332	1.15911	up
MEDN751	(±)12-HETE [(±)12-hydroxy-5Z,8Z,10E,14Z-eicosatetraenoic acid]	Oxidized lipid	1707600	1328100	1249500	3221200	3137600	3200500	1.13497	2.23077	1.15754	up
MEDP843	ETHYL ISOBUTYRATE	Fatty acyls	2763000	1431800	1652200	4353700	4767100	3899500	1.04503	2.22683	1.15499	up
MEDP879	N-Methyl-D-Aspartic Acid	Amino Acid metabolomics	259250	137850	135670	385330	450080	340500	1.02193	2.20716	1.14219	up
MEDP082	S-Sulfo-L-Cysteine	Amino Acid metabolomics	26437	22049	16600	44965	44449	52562	1.09518	2.18136	1.12523	up
MEDN792	PGE1 [9-oxo-11α,15S-dihydroxy-prost-13E-en-1-oic acid]	Oxidized lipid	50803	34308	31382	89745	85622	76657	1.08499	2.16343	1.11332	up
MEDN779	5-HETrE [5S-hydroxy-6E,8Z,11Z-eicosatrienoic acid]	Oxidized lipid	21084	14189	13615	36906	34911	33367	1.09628	2.15153	1.10536	up
MEDN573	GDP-L-fucose	Nucleotide metabolomics	848150	860250	666250	1592000	1666500	1848400	1.13227	2.15059	1.10473	up
Cmzp002	LysoPC 14:0 (2n isomer)	Lipids_Glycerophospholipids	7439600	5510100	4492100	12274000	12855000	12179000	1.09013	2.139	1.09694	up
MWS1828-N	Bis (2-ethylhexyl) phthalate	Aldehydes, ketones, esters	49585	35638	52275	81833	88536	121000	1.06813	2.11908	1.08344	up
MEDP423	Phosphoric Acid	Organic Acid And Its Derivatives	30919000	25031000	23264000	56786000	55304000	54773000	1.13649	2.10648	1.07484	up
MEDN163	Hypoxanthine	Nucleotide metabolomics	1348000	1273000	1013200	2655600	2487700	2477300	1.13213	2.09691	1.06827	up
MEDN765	11,12-EET [(±)11,(12)-epoxy-5Z,8Z,14Z-eicosatrienoic acid]	Oxidized lipid	259160	206110	189970	423990	477680	468800	1.12603	2.09155	1.06458	up
MEDN713	6-Phosphogluconic Acid Trisodium Salt	Carbohydrate metabolomics	174230	149800	145710	314940	306950	359460	1.14475	2.08913	1.06291	up
Cmhp012	CAR C6:0 Isomer 2	Carnitine	101980	103500	76495	198220	204240	184420	1.1206	2.08132	1.0575	up
MEDP618	2-Methylbutyroylcarnitine (CAR C5:0)	Carnitine	272080	173150	191240	442480	406010	467940	1.091	2.06833	1.04847	up
MEDP251	Trigonelline	CoOthersEnzyme Factor & vitamin	39207	18781	23215	49735	60569	57596	1.00802	2.06766	1.048	up
MWS0970-P	biliverdin	Tryptamine, Choline, pigment	7125	5476	5691.5	11618	13372	12346	1.12984	2.04106	1.02932	up
Cmhp066	CAR C14:0	Carnitine	127170	97271	101630	214900	225840	221840	1.13554	2.03201	1.02291	up
MEDP792	PYRROLIDINE	Others	57127	61085	73436	120910	116570	151590	1.11509	2.03013	1.02157	up
MEDP336	Lysopc 14:0	Lipids_Glycerophospholipids	5416400	4341800	3569400	8799700	9200800	9038400	1.10467	2.02879	1.02062	up
MEDP305	Creatinine	Organic Acid And Its Derivatives	14488	17395	13593	22784	41723	26693	1.00001	2.00545	1.00393	up
MEDP384	Isoxanthopterin	Pteridines and derivatives	151550	135740	108610	60502	58736	72960	1.10452	0.485471	-1.04254	down
Cmmn9750	2-Hexyldecanoic acid	Lipids_Fatty Acids	58430	62369	35173	25126	29075	21189	1.01564	0.483356	-1.04884	down
MEDP872	Glycerophosphatidylcholine	Lipids_Glycerophospholipids	152480000	139200000	141780000	67282000	70950000	66905000	1.16101	0.473255	-1.07931	down
MEDN244	Orotic Acid	CoOthersEnzyme Factor & vitamin	75246	62792	73797	25282	33647	40908	1.08121	0.471296	-1.08529	down
Wmmn6656	(R)-2-hydroxystearic acid	Lipids_Fatty Acids	870110	708780	697060	346330	339300	344930	1.14598	0.452804	-1.14304	down
MEDN214	L-Arabitol	Carbohydrate metabolomics	567970	642930	747010	308940	206390	363000	1.05752	0.448606	-1.15648	down
Wmjn1221	DL-p-Hydroxyphenyllactic acid	Organic Acid And Its Derivatives	138720	165400	159460	60928	76343	69753	1.14202	0.446577	-1.16302	down
Cmzn022	LysoPE 22:6 (2n isomer1)	Lipids_Glycerophospholipids	14710000	9976200	10208000	5494000	5392500	4684000	1.10296	0.44622	-1.16417	down
Wmxn3693	Methoprene acid	Organic Acid And Its Derivatives	2238300	2153700	2074700	957340	938630	930230	1.16379	0.437039	-1.19417	down
MEDN028	4-Hydroxy-L-Glutamic Acid	Amino Acid metabolomics	222110	173680	118800	73248	76970	63706	1.06547	0.415717	-1.26633	down
MEDN563	DL-Benzylsuccinic acid	Organic Acid And Its Derivatives	65077	61524	40158	17473	29665	21195	1.05195	0.409771	-1.28711	down
Wmjp0831	?Valylleucine	Amino Acid metabolomics	302550	238490	244880	101220	113950	95943	1.14417	0.395858	-1.33694	down
Cmzn021	LysoPE 22:6	Lipids_Glycerophospholipids	13109000	14362000	13149000	5039600	5141400	4841400	1.16368	0.369828	-1.43507	down
MEDN390	EPA [5Z,8Z,11Z,14Z,17Z-eicosapentaenoic acid]	Oxidized lipid	31106000	27604000	24575000	10053000	10360000	9748700	1.15496	0.36215	-1.46534	down
MEDN398	AA [5Z,8Z,11Z,14Z-eicosatetraenoic acid]	Oxidized lipid	692320	618410	548310	209790	230640	199580	1.15378	0.344269	-1.53839	down
Cmhp083	CAR C17:1	Carnitine	30983	21007	24589	7936.3	8746.5	9231.4	1.13497	0.338398	-1.56321	down
MEDN373	LipoxinA4 [5S,6R,15S-trihydroxy-7E,9E,11Z,13E-eicosatetraenoic acid]	Oxidized lipid	22228	14415	13683	4291.4	4465.3	5897.3	1.1136	0.291181	-1.78001	down
Cmhp113	CAR C21:2	Carnitine	281290	228710	222290	54940	53226	53564	1.1595	0.220855	-2.17883	down
MEDP442	Sn-Glycero-3-Phosphocholine	Tryptamine, Choline, pigment	69983000	64493000	61942000	14790000	14626000	12927000	1.16301	0.215576	-2.21373	down
MEDP859	glycylphenylalanine	Amino Acid metabolomics	370600	316190	265640	44377	71359	81292	1.1273	0.206869	-2.27321	down
MEDN161	Guanosine 3',5'-Cyclic Monophosphate	Nucleotide metabolomics	117930	93114	99828	19903	18403	24574	1.15254	0.20227	-2.30565	down
MEDN832	D-Glucosamine 6-Phosphate	Carbohydrate metabolomics	3590400	3246300	2413200	362410	376420	503830	1.15048	0.134343	-2.89601	down
MWS0965-N	24,25-Dihydrolanosterol	Lipids_others	28416	16560	12707	1416.8	1966.3	1169.4	1.13849	0.0789227	-3.66342	down
MEDN537	ADP-ribose	Nucleotide metabolomics	4572300	3736200	3749100	77326	108580	107590	1.16247	0.0243412	-5.36046	down
MEDN776	5(S),15(S)-DiHETE [5S,15S-dihydroxy-6E,8Z,10Z,13E-eicosatetraenoic acid]	Oxidized lipid	15214	13327	14242	9	9	9	1.16538	0.000631092	-10.6299	down
Cmhp023	CAR C8:1	Carnitine	92116	53804	48620	9	9	9	1.16423	0.000138789	-12.8148	down

## Sheet: S3-5 vs S1-5
Index	Compounds	Class	S1-5a	S1-5b	S1-5c	S3-5a	S3-5b	S3-5c	VIP	Fold_Change	Log2FC	Type
MEDP874	tryptophan betaine	Amino Acid metabolomics	9	9	9	498310	444310	509640	1.20832	53787.4	15.715	up
MEDP529	Indole-3-acetamide	Indole And Its Derivatives	9	9	9	150970	130370	180170	1.20834	17093	14.0611	up
Cmhp087	CAR C15:DC*	Carnitine	9	9	9	72486	55793	70520	1.20827	7362.93	12.8461	up
MWS0970-P	biliverdin	Tryptamine, Choline, pigment	2535.8	1746.1	1206.8	185690	177380	250990	1.20234	111.877	6.80577	up
Cmzp025	LysoPC 20:1	Lipids_Glycerophospholipids	120770	81822	151050	6946600	6691000	7924200	1.20559	60.9707	5.93004	up
Cmzp026	LysoPC 20:1 (2n isomer)	Lipids_Glycerophospholipids	128180	85463	156550	6613700	6616800	7426200	1.20552	55.7998	5.80219	up
Cmzn020	LysoPE 20:2	Lipids_Glycerophospholipids	23364	15932	18896	830450	941230	1111300	1.20644	49.5425	5.6306	up
Cmzp008	LysoPC 18:3 (2n isomer2)	Lipids_Glycerophospholipids	209210	165360	160220	8454700	8056500	8262300	1.20725	46.3238	5.53368	up
Cmzp007	LysoPC 18:3 (2n isomer1)	Lipids_Glycerophospholipids	214270	158750	191080	9020100	7428400	9041300	1.20752	45.1867	5.49783	up
Cmhp015	CAR ph-C1	Carnitine	14707	6071.1	7700.9	288760	248910	265750	1.19541	28.211	4.81818	up
MEDN162	Guanosine Monophosphate	Nucleotide metabolomics	229040	181970	222540	4740400	5801500	6065800	1.20683	26.2137	4.71225	up
MEDP601	Spermidine	Amines	280760	139590	89969	4365600	3849100	4430100	1.18431	24.7782	4.631	up
Cmzn018	LysoPE 20:3(2n isomer1)	Lipids_Glycerophospholipids	208430	170570	178320	3831900	4098200	4404900	1.20755	22.1327	4.46811	up
Cmzn017	LysoPE 20:3	Lipids_Glycerophospholipids	216560	166420	158890	3794900	4047300	4140500	1.20601	22.1136	4.46686	up
Cmzp023	LysoPC 20:2	Lipids_Glycerophospholipids	593760	405500	584580	11129000	10568000	10960000	1.20591	20.6189	4.36589	up
Cmzp024	LysoPC 20:2 (2n isomer2)	Lipids_Glycerophospholipids	972230	657930	1001400	14438000	14176000	15395000	1.20485	16.7235	4.06381	up
Cmzp033	LysoPC 22:4	Lipids_Glycerophospholipids	35362	15677	21093	390290	344810	388910	1.19323	15.5827	3.96187	up
Cmzn006	LysoPE 18:3 (2n isomer)	Lipids_Glycerophospholipids	121200	61785	80049	1276700	1347600	1441900	1.19805	15.4588	3.95036	up
Cmzp034	LysoPC 22:4 (2n isomer1)	Lipids_Glycerophospholipids	32542	18948	21688	354050	354800	385310	1.20106	14.952	3.90227	up
Cmzn027	LysoPE 22:4(2n isomer1)	Lipids_Glycerophospholipids	15492	9109.2	8016.7	133910	147220	148390	1.19413	13.1682	3.71899	up
MEDN713	6-Phosphogluconic Acid Trisodium Salt	Carbohydrate metabolomics	132460	115540	31628	1267900	1106400	1156200	1.14018	12.6257	3.65829	up
MEDN158	Deoxyguanosine	Nucleotide metabolomics	138500	104160	113660	1263300	1052000	1232600	1.20498	9.95706	3.31572	up
Cmzp015	LysoPC 18:0 (2n isomer)	Lipids_Glycerophospholipids	10916000	7437800	8508900	91132000	86038000	85698000	1.20347	9.78561	3.29066	up
Cmzn010	LysoPE 18:1 (2n isomer)	Lipids_Glycerophospholipids	141420	93861	97467	1123100	1020400	1024300	1.20066	9.52012	3.25098	up
Cmzp014	LysoPC 18:0	Lipids_Glycerophospholipids	10706000	7691400	8732200	82053000	83215000	85290000	1.20494	9.2356	3.2072	up
MEDP537	PAF C-16	Lipids_others	11846000	8734300	9360900	91575000	88034000	92592000	1.205	9.09119	3.18447	up
MEDN152	Adenosine 5'-Diphosphate	Nucleotide metabolomics	1566000	798470	505100	7422700	8612000	9473000	1.15885	8.88903	3.15203	up
Cmzp012	LysoPC 18:1	Lipids_Glycerophospholipids	7032000	5199000	6553900	51526000	55161000	55229000	1.20531	8.61948	3.1076	up
Cmzp013	LysoPC 18:1 (2n isomer)	Lipids_Glycerophospholipids	7114900	5265300	6559300	55770000	52927000	54113000	1.20556	8.59632	3.10372	up
MEDN791	PGD1 [9α,15S-dihydroxy-11-oxo-prost-13E-en-1-oic acid]	Oxidized lipid	7042.4	5787.7	5023.3	47968	47048	51409	1.20279	8.20152	3.03589	up
MEDP177	Thymine	Nucleotide metabolomics	88152	80010	70141	679310	474850	736240	1.19707	7.93276	2.98782	up
MEDP155	5-Methylcytosine	Nucleotide metabolomics	23075	22582	24505	194720	192940	165120	1.20595	7.87862	2.97794	up
Cmzn008	LysoPE 18:2 (2n isomer)	Lipids_Glycerophospholipids	405370	315260	398420	2575800	2687100	3268900	1.20389	7.62415	2.93058	up
MEDN368	Lysope 14:0	Lipids_Glycerophospholipids	106890	73086	85489	627710	603500	640690	1.20231	7.0514	2.81791	up
MEDN793	PGE2 [9-oxo-11α,15S-dihydroxy-prosta-5Z,13E-dien-1-oic acid]	Oxidized lipid	234670	193920	177960	1394200	1270100	1458500	1.20342	6.79713	2.76493	up
MEDN624	5'-Adenylyl sulfate (APS)	Nucleotide metabolomics	3029700	1882100	669240	11662000	12684000	13505000	1.10689	6.78207	2.76173	up
Cmzp010	LysoPC 18:2	Lipids_Glycerophospholipids	4954400	3056300	4132700	27414000	25684000	27699000	1.19785	6.65357	2.73413	up
MEDP178	Uracil	Nucleotide metabolomics	92319	42664	46347	375640	414680	414530	1.17339	6.64452	2.73216	up
MEDN792	PGE1 [9-oxo-11α,15S-dihydroxy-prost-13E-en-1-oic acid]	Oxidized lipid	27293	23276	22028	161570	143570	166100	1.20479	6.49118	2.69848	up
Cmhp053	CAR C12:0	Carnitine	14468	14096	12789	89431	78136	97116	1.20508	6.40058	2.6782	up
Cmzp011	LysoPC 18:2 (2n isomer)	Lipids_Glycerophospholipids	5185100	3303800	4503200	27968000	25728000	27698000	1.19837	6.26488	2.64729	up
MEDN536	estrone 3-sulfate	Hormones	2679	2969.6	2863.7	19347	14988	16930	1.20362	6.02246	2.59035	up
MEDP039	Betaine	Tryptamine, Choline, pigment	11763000	10324000	9485100	67279000	59138000	62764000	1.20434	5.99203	2.58305	up
Cmzp004	LysoPC 16:1 (2n isomer)	Lipids_Glycerophospholipids	24251000	14971000	16783000	116280000	104110000	113550000	1.19408	5.96268	2.57596	up
MEDN434	Β-Pseudouridine	Nucleotide metabolomics	16693	16008	3602.5	82824	66345	59014	1.06028	5.73452	2.51967	up
MEDP035	5-Hydroxy-L-Tryptophan	Amino Acid metabolomics	51940	20805	37254	229760	172990	218120	1.15873	5.64432	2.4968	up
Cmmn9102	2-hydroxyhexadecanoic acid	Lipids_Fatty Acids	108110	94644	85403	558230	495180	566080	1.20346	5.62017	2.49061	up
MEDN779	5-HETrE [5S-hydroxy-6E,8Z,11Z-eicosatrienoic acid]	Oxidized lipid	12701	8859.8	10279	61930	53141	61115	1.19986	5.53351	2.4682	up
Cmzp018	LysoPC 20:4	Lipids_Glycerophospholipids	14126000	9352000	10761000	69069000	59418000	57029000	1.19484	5.41827	2.43783	up
Cmzp019	LysoPC 20:4 (2n isomer)	Lipids_Glycerophospholipids	10568000	6862400	6327600	41446000	42346000	43426000	1.18818	5.35474	2.42082	up
MEDP373	N-Acetylglycine	Amino Acid metabolomics	22136000	16903000	18342000	102750000	99958000	98501000	1.20357	5.24928	2.39212	up
MEDN171	Uridine	Nucleotide metabolomics	183350	134810	141720	779850	819400	799820	1.20106	5.21673	2.38315	up
MEDP583	Asp-Phe methyl ester	Others	1201700	905200	988570	5333300	4651200	5587200	1.20134	5.03048	2.3307	up
Cmhp106	CAR ph-C14	Carnitine	19797	16783	17428	90213	93264	85372	1.20538	4.97795	2.31555	up
MEDP297	5-Aminovaleric Acid	Organic Acid And Its Derivatives	23192	17835	18836	103530	94079	97733	1.20267	4.93363	2.30265	up
MEDP176	Thymidine	Nucleotide metabolomics	24014	24498	17160	113690	103430	101640	1.19218	4.85382	2.27912	up
Cmzp029	LysoPC 22:5	Lipids_Glycerophospholipids	7014900	4888300	4857200	26153000	25229000	28463000	1.19447	4.76391	2.25215	up
MEDP821	6-Methylnicotinamide	Pyridine And Pyridine Derivatives	279620	189070	275600	1054100	1328700	1154000	1.19073	4.75191	2.24851	up
MEDP086	Urea	Amino Acid metabolomics	27661	40367	37797	206780	122940	171640	1.17323	4.73763	2.24417	up
MEDN027	3-N-Methyl-L-Histidine	Amino Acid metabolomics	47815	41846	53038	191780	268240	209660	1.19392	4.69296	2.2305	up
MEDP863	proline betaine	Organic Acid And Its Derivatives	25824000	20729000	21186000	106150000	106070000	103700000	1.20379	4.66378	2.2215	up
Cmzp016	LysoPC 20:5 (2n isomer)	Lipids_Glycerophospholipids	2896000	1957200	1930800	10102000	10130000	11352000	1.19112	4.65566	2.21899	up
MEDN336	N'-Formylkynurenine	Organic Acid And Its Derivatives	7631.2	9162.5	7058	36134	36203	38593	1.20004	4.65082	2.21749	up
Cmzp017	LysoPC 20:5	Lipids_Glycerophospholipids	2914300	1921400	1880000	9982700	10153000	10844000	1.18895	4.61303	2.20571	up
Cmhp123	CAR C22:1	Carnitine	38242	34632	36930	157260	180740	167690	1.20595	4.60539	2.20332	up
Cmzp032	LysoPC 22:5 (2n isomer3)	Lipids_Glycerophospholipids	7233300	4907000	4669800	25038000	24839000	27184000	1.18962	4.58421	2.19667	up
MEDP403	Deoxycytidine	Nucleotide metabolomics	535130	384700	459700	2360100	1710400	2210700	1.19241	4.55314	2.18686	up
Cmzn015	LysoPE 20:4	Lipids_Glycerophospholipids	6855400	5414500	5190500	25466000	25596000	28074000	1.20034	4.53231	2.18025	up
Cmzn016	LysoPE 20:4(2n isomer1)	Lipids_Glycerophospholipids	6831700	5407400	5274600	25533000	25711000	27560000	1.20137	4.49956	2.16978	up
Cmzp031	LysoPC 22:5 (2n isomer2)	Lipids_Glycerophospholipids	7175500	5225900	5135400	25737000	25030000	27905000	1.19621	4.48611	2.16546	up
Cmzp030	LysoPC 22:5 (2n isomer1)	Lipids_Glycerophospholipids	7422100	5301500	4876700	26117000	24982000	27846000	1.19126	4.48543	2.16525	up
MEDN765	11,12-EET [(±)11,(12)-epoxy-5Z,8Z,14Z-eicosatrienoic acid]	Oxidized lipid	261700	184590	190710	975860	873210	954830	1.19543	4.40173	2.13807	up
MEDP494	Lysopc 15:0	Lipids_Glycerophospholipids	2541500	1790300	2156400	9347300	9047300	10013000	1.199	4.37835	2.13039	up
MEDP336	Lysopc 14:0	Lipids_Glycerophospholipids	5012500	3559100	3870700	19196000	15674000	17915000	1.19457	4.24238	2.08487	up
MEDN316	Guanidinoethyl Sulfonate	Organic Acid And Its Derivatives	7138.5	3265.3	1359.7	18353	12743	18690	1.0336	4.23224	2.08142	up
Cmzp002	LysoPC 14:0 (2n isomer)	Lipids_Glycerophospholipids	6671500	4702900	5575200	25056000	21489000	24634000	1.19682	4.19945	2.0702	up
MEDP160	Adenosine	Nucleotide metabolomics	12080000	9893200	9566000	43699000	39629000	47997000	1.20002	4.16387	2.05792	up
Wmjn0416	Inosine-5'-monophosphate	Nucleotide metabolomics	3509300	2765800	2723300	13377000	13511000	10537000	1.19148	4.15907	2.05626	up
MEDN818	N-acetyl-beta-alanine	Amino Acid metabolomics	144550	127640	78552	537810	449620	465120	1.16441	4.14136	2.05011	up
MEDP149	2'-Deoxyadenosine-5'-Monophosphate	Nucleotide metabolomics	583260	408300	343460	2268500	1585600	1668200	1.16689	4.13649	2.04841	up
Cmhp127	CAR C22:2-OH(3)	Carnitine	24605	18533	21006	84348	86695	91665	1.20154	4.0956	2.03407	up
Cmhp003	CAR C3:0	Carnitine	976350	622220	663670	3302200	2829900	2919700	1.18391	4.00126	2.00045	up
Cmzn011	LysoPE 18:0	Lipids_Glycerophospholipids	11458000	10695000	10965000	42961000	43482000	45163000	1.20809	3.97385	1.99054	up
MEDN662	Gamma-Glu-Leu	Organic Acid And Its Derivatives	971440	713280	691180	3378900	2741800	3241800	1.19024	3.94061	1.97842	up
MEDP538	LTD4 [5S-hydroxy-6R-(S-cysteinylglycinyl)-7E,9E,11Z,14Z-eicosatetraenoic acid]	Lipids_Fatty Acids	6273800	4637000	5399600	22784000	20767000	20435000	1.1989	3.92302	1.97196	up
Cmzn012	LysoPE 18:0 (2n isomer)	Lipids_Glycerophospholipids	11996000	10692000	11162000	42956000	42280000	45904000	1.20716	3.87415	1.95388	up
MEDP575	5-amino-1-[3,4-dihydroxy-5-(hydroxymethyl)oxolan-2-yl]imidazole-4-carboxamide	Nucleotide metabolomics	23242	28861	24581	108160	84526	92114	1.19385	3.71394	1.89295	up
Cmzn024	LysoPE 22:5(2n isomer2)	Lipids_Glycerophospholipids	4238300	3473200	3011700	13075000	12667000	13674000	1.19406	3.67577	1.87805	up
MEDP158	8-Hydroxyguanosine	Nucleotide metabolomics	46238	40490	53555	132000	204510	169540	1.1773	3.60735	1.85094	up
Cmzn025	LysoPE 22:5(2n isomer3)	Lipids_Glycerophospholipids	4318600	3502000	3121000	12704000	12357000	14378000	1.19314	3.6045	1.8498	up
Cmzn007	LysoPE 18:2	Lipids_Glycerophospholipids	53728	38118	41770	158680	140490	181490	1.18905	3.59732	1.84692	up
MEDP250	Riboflavin	CoOthersEnzyme Factor & vitamin	201890	150090	159000	598700	593030	643070	1.19738	3.59075	1.84428	up
Cmzn003	LysoPE 16:0	Lipids_Glycerophospholipids	18180000	13857000	14387000	56367000	52746000	57370000	1.19854	3.58614	1.84243	up
MEDN533	Xanthosine	Nucleotide metabolomics	170600	189050	151650	692590	497950	630960	1.18767	3.56249	1.83289	up
Cmzn023	LysoPE 22:5(2n isomer1)	Lipids_Glycerophospholipids	4400800	3623700	3164500	12973000	12731000	14076000	1.19381	3.55528	1.82996	up
Wmjp0774	ALANYL-dl-LEUCINE	Amino Acid metabolomics	50835	42575	57789	176610	180520	178400	1.19945	3.54189	1.82452	up
Cmzn004	LysoPE 16:0 (2n isomer)	Lipids_Glycerophospholipids	17808000	13934000	15221000	55120000	52233000	57111000	1.20154	3.50199	1.80818	up
MEDP313	Guanidineacetic Acid	Organic Acid And Its Derivatives	20501	26748	16531	78710	68308	76248	1.17398	3.50056	1.80759	up
MEDN498	Ribulose-5-Phosphate	Carbohydrate metabolomics	3827300	3196500	2803500	12187000	10816000	11251000	1.19385	3.4856	1.80141	up
Wmjp0837	Indole-3-carboxyaldehyde	Indole And Its Derivatives	109180	83647	81482	325490	303330	323720	1.1953	3.47251	1.79598	up
MEDN641	Ribose 1-phosphate	Carbohydrate metabolomics	1626900	1298700	1239700	5040600	4546900	4821000	1.19679	3.45917	1.79043	up
Cmzn013	LysoPE 20:5	Lipids_Glycerophospholipids	483850	367340	346070	1320900	1299000	1471800	1.19082	3.41755	1.77296	up
MEDN057	N-Acetyl-L-Tyrosine	Amino Acid metabolomics	7522	3360	14296	34260	24758	26899	1.03678	3.41238	1.77078	up
Cmzn014	LysoPE 20:5(2n isomer1)	Lipids_Glycerophospholipids	499180	361010	351790	1352600	1325700	1449800	1.1891	3.40608	1.76811	up
MEDP664	L- tyrosine methyl ester	Amino Acid metabolomics	73036	86728	70252	288300	260550	228090	1.19075	3.37777	1.75607	up
MEDP115	1,4-Dihydro-1-Methyl-4-Oxo-3-Pyridinecarboxamide	Pyridine And Pyridine Derivatives	144680	133510	154550	424590	513590	514060	1.20031	3.35592	1.74671	up
MEDP879	N-Methyl-D-Aspartic Acid	Amino Acid metabolomics	143660	82932	115670	433620	366920	337650	1.16446	3.32549	1.73357	up
MEDP375	Deoxyadenosine	Nucleotide metabolomics	475150	351360	315960	1440000	1123100	1206100	1.17603	3.29917	1.7221	up
MEDP151	2-Hydroxy-6-Aminopurine	Nucleotide metabolomics	270900	246670	180010	829300	644580	821930	1.17227	3.29111	1.71857	up
Cmhp020	CAR C6-OH(3)	Carnitine	20567	22414	24148	72965	60223	82359	1.19278	3.21094	1.68299	up
Cmhp010	CAR C6:0	Carnitine	68530	62609	54832	184170	197720	208170	1.19818	3.17286	1.66578	up
MEDP212	N-Acetyl-5-Hydroxytryptamine	Tryptamine, Choline, pigment	41977	31369	20386	100210	85814	110070	1.13107	3.15894	1.65944	up
Cmhp077	CAR C16:1	Carnitine	49870	37551	29677	119670	112330	131780	1.16603	3.10663	1.63535	up
MEDN138	1-Methylhistidine	Amino Acid metabolomics	48021	39797	52502	156810	141390	123390	1.18779	3.00449	1.58712	up
MEDN657	D-Xylulose 5-phosphate	Carbohydrate metabolomics	7190400	6129600	5052300	18369000	16729000	19005000	1.18464	2.94481	1.55818	up
MEDP395	L-Pipecolic Acid	Amino Acid metabolomics	245900	130940	201920	609010	478940	603270	1.14156	2.92214	1.54703	up
MEDP275	Indole-3-Acetic Acid	Indole And Its Derivatives	713130	558670	616090	1861400	1718400	1923600	1.19827	2.91511	1.54355	up
MEDN602	deoxyguanosine 5'-monophosphate (dGMP)	Nucleotide metabolomics	2373400	1853600	2276600	6269500	6352300	6108300	1.19809	2.87996	1.52605	up
MEDN245	Pantothenate	CoOthersEnzyme Factor & vitamin	866480	595900	845140	2453800	1892900	2291600	1.17247	2.87681	1.52447	up
MEDN782	8,9-EET [(±)8,9-epoxy-5Z,11Z,14Z-eicosatrienoic acid]	Oxidized lipid	24393	18206	16931	58544	51478	60805	1.17924	2.8696	1.52085	up
MEDP456	Piperidine	Benzene and substituted derivatives	602340	554230	619280	1911700	1441000	1642100	1.1932	2.81262	1.49192	up
MEDN753	(±)16-HETE [(±)16-hydroxy-5Z,8Z,11Z,14Z-eicosatetraenoic acid]	Oxidized lipid	6923.3	7965.7	7400.7	20982	19739	21710	1.20244	2.80089	1.48589	up
MEDN019	L-Tryptophan	Amino Acid metabolomics	1065800	760840	746130	2538000	2091900	2559500	1.17299	2.79442	1.48255	up
MWS0755-N	cis-11,14,17-Eicosatrienoic Acid(C2-:3)	Bile Acids	6433800	5775800	5323500	16115000	15665000	16803000	1.20065	2.77093	1.47037	up
MEDP849	Nα-Acetyl-L-glutamine	Amino Acid metabolomics	66160	144500	85004	277950	264810	271980	1.10228	2.75563	1.46238	up
MEDP047	Histamine	Amines	623480	488470	614390	1592600	1081900	2058600	1.12514	2.7417	1.45507	up
MEDP298	6-Aminocaproic Acid	Organic Acid And Its Derivatives	8606500	5619600	5456600	19951000	16192000	17763000	1.15593	2.73875	1.45352	up
MEDP244	All-Trans-13,14-Dihydroretinol	CoOthersEnzyme Factor & vitamin	44855	40170	39132	101320	109220	128850	1.19409	2.73356	1.45078	up
MEDP043	Glutathione Oxidized	Amino Acid metabolomics	2385100	1875200	1449500	4836900	4993000	5401100	1.15812	2.66752	1.4155	up
MEDP028	(5-L-Glutamyl)-L-Amino Acid	Amino Acid metabolomics	91206	88987	83845	240150	198970	260660	1.19265	2.6503	1.40616	up
MEDP431	Hordenine	Benzene and substituted derivatives	52615	49835	42428	133390	109130	140090	1.18422	2.64091	1.40104	up
MEDN160	Guanosine	Nucleotide metabolomics	24229000	19693000	17492000	54290000	57707000	49890000	1.17986	2.636	1.39835	up
MEDN394	Cis-11,14-Eicosadienoic Acid (C20:2)	Lipids_Fatty Acids	7609.7	6783.5	6840.8	15680	19560	20177	1.18947	2.60982	1.38395	up
MEDN531	D-Glucarate	Carbohydrate metabolomics	9185.9	8356.9	6254.7	19016	15515	27303	1.1132	2.59834	1.37759	up
Cmhp092	CAR C18:1	Carnitine	281420	183490	184890	497430	538100	643490	1.14985	2.5839	1.36955	up
MEDP545	2-Pyrrolidinone	Benzene and substituted derivatives	726560	668560	618020	1860300	1497600	1817700	1.19117	2.57091	1.36228	up
MEDN496	N-Acetylmethionine	Amino Acid metabolomics	24050	14054	20793	53209	40927	56210	1.13254	2.55269	1.35202	up
Cmhp012	CAR C6:0 Isomer 2	Carnitine	116830	87319	93206	263020	244690	250090	1.18843	2.54847	1.34963	up
MEDP296	4-Guanidinobutyric Acid	Organic Acid And Its Derivatives	5332400	4205800	4853800	12783000	11262000	12079000	1.19441	2.51001	1.32769	up
Cmhp066	CAR C14:0	Carnitine	96148	72585	81419	219690	184400	219250	1.1844	2.49184	1.31721	up
MEDP523	DL-Carnitine	Carnitine	1938400	1561600	1602700	4118400	4072200	4502300	1.19448	2.48749	1.31469	up
MEDN106	Taurochenodesoxycholic Acid	Bile Acids	144500	115820	102130	283340	290440	325360	1.17569	2.48073	1.31076	up
MEDN808	Myoinositol	Carbohydrate metabolomics	159000	145880	158720	354160	384670	394490	1.20429	2.44461	1.2896	up
MEDP205	L-Carnitine	Carnitine	428880	379860	433620	1106100	849870	1071000	1.18659	2.43647	1.28479	up
MEDP156	5-Methyluridine	Nucleotide metabolomics	325330	255960	254450	655500	607280	772860	1.17791	2.43573	1.28436	up
MEDN122	Inositol	Carbohydrate metabolomics	178740	165780	163120	427900	403030	394700	1.20381	2.41437	1.27165	up
MWS2383-N	2-hydroxystearate	Lipids_Fatty Acids	29511	27025	26411	67629	60162	70935	1.19903	2.39582	1.26052	up
MEDP525	N-Acetyl-L-alanine	Amino Acid metabolomics	5499300	4105900	4746700	12299000	10306000	11635000	1.18227	2.38575	1.25444	up
MEDP305	Creatinine	Organic Acid And Its Derivatives	18810	14196	12304	36501	39989	31240	1.14489	2.37762	1.24952	up
Wmjp0649	(R)-(-)-2-Phenylglycinol	Amino Acid metabolomics	5418400	4524500	4487500	12404000	10964000	10669000	1.18953	2.3587	1.23799	up
MEDP883	2,4-Dihydroxypteridine	Pteridines and derivatives	21167	20548	13873	47009	36250	47646	1.12975	2.35491	1.23567	up
MEDP123	Acetylcholine Chloride	Tryptamine, Choline, pigment	367540	314950	313880	784090	734020	813370	1.19816	2.33997	1.22649	up
MEDP603	Cuminaldehyde	Others	183620	165190	130160	408750	361340	349870	1.16609	2.33827	1.22544	up
MEDP012	L-Ornithine	Amino Acid metabolomics	48156	71205	35437	98840	138370	124250	1.06631	2.33504	1.22345	up
MEDP357	Urocanic Acid	Organic Acid And Its Derivatives	61917	57379	48477	143580	109950	138080	1.16993	2.33417	1.22291	up
MEDP381	7-Methylguanine	Nucleotide metabolomics	13845000	11479000	10025000	28002000	25545000	28648000	1.17674	2.32524	1.21738	up
MEDN573	GDP-L-fucose	Nucleotide metabolomics	930890	675530	367250	1478200	1466200	1622200	1.02999	2.31376	1.21024	up
MEDP165	Cytosine	Nucleotide metabolomics	1203100	893390	966340	2190200	2216900	2666400	1.1736	2.30947	1.20756	up
MEDN373	LipoxinA4 [5S,6R,15S-trihydroxy-7E,9E,11Z,13E-eicosatetraenoic acid]	Oxidized lipid	22975	16615	15869	45899	42589	39413	1.15918	2.30623	1.20553	up
MEDP685	Methylcysteine	Amino Acid metabolomics	2222400	1985200	1721600	4868000	4072600	4639000	1.1804	2.29029	1.19553	up
Cmhp011	CAR C6:0 Isomer1	Carnitine	104600	82120	74826	216500	194350	186340	1.16806	2.28331	1.19113	up
MEDN656	Indoleacetaldehyde	Indole And Its Derivatives	596160	467640	386970	1077900	1095400	1102600	1.15569	2.25804	1.17507	up
MEDN013	L-Isoleucine	Amino Acid metabolomics	103740	107640	76360	207730	214490	223720	1.16262	2.24487	1.16663	up
MWS0402-N	trans-4-Hydroxy-D-proline	Amino Acid metabolomics	168430	123640	107790	326380	256640	313940	1.13514	2.24319	1.16555	up
MEDP020	L-Methionine	Amino Acid metabolomics	7517100	6850200	6002200	17076000	12940000	15500000	1.17005	2.23452	1.15996	up
MEDP457	5-Aminolevulinate	Organic Acid And Its Derivatives	50795	48512	37425	121580	91553	90656	1.14088	2.22178	1.15172	up
MEDP036	5-Oxoproline	Amino Acid metabolomics	176020	183700	144230	327820	313010	478540	1.12692	2.22119	1.15133	up
MEDN763	(±)9-HETE [(±)-9-hydroxy-5Z,7E,11Z,14Z-eicosatetraenoic acid]	Oxidized lipid	75081	56509	41520	132670	110640	138700	1.10096	2.20675	1.14192	up
Whmp0600	Allopurinol	Nucleotide metabolomics	22687000	19488000	22378000	45904000	46662000	49325000	1.20058	2.19805	1.13623	up
MEDP374	Cyclic Amp	Nucleotide metabolomics	280190	217470	165280	440100	482530	533210	1.12021	2.19604	1.1349	up
MEDN659	Pyrophosphate	Organic Acid And Its Derivatives	1759100	1381000	1186100	3513800	2621600	3352500	1.13496	2.19313	1.13299	up
MEDN741	Methanesulfonic acid	Others	482700	426430	264320	942460	732190	895140	1.08146	2.18994	1.13089	up
MEDP507	2-Hydroxycinnamic acid	Benzene and substituted derivatives	703230	667740	533860	1482400	1178100	1509700	1.1587	2.18928	1.13045	up
Cmhp074	CAR C14-OH(3)	Carnitine	17199	18181	11000	35279	32595	32911	1.11472	2.17303	1.11971	up
MEDN351	12-Hete	Lipids_Fatty Acids	1084700	894940	858670	2072600	1883300	2210300	1.1823	2.17249	1.11935	up
Cmzn002	LysoPE 16:1 (2n isomer)	Lipids_Glycerophospholipids	262350	184690	180670	454770	426810	470780	1.15399	2.15443	1.10731	up
MEDN209	Tryptamine	Tryptamine, Choline, pigment	63106	50097	50075	121180	111910	114770	1.18345	2.13048	1.09118	up
MEDN751	(±)12-HETE [(±)12-hydroxy-5Z,8Z,10E,14Z-eicosatetraenoic acid]	Oxidized lipid	1785400	1381600	1329300	3306700	2833600	3421200	1.16416	2.12653	1.0885	up
MEDN821	Scyllo inositol	Alcohol	107500	130750	135700	273550	258110	261090	1.1851	2.11994	1.08402	up
MEDP378	N6-Succinyl Adenosine	Nucleotide metabolomics	627480	463190	464400	1107300	1037800	1103400	1.167	2.08897	1.06279	up
MEDP367	γ-Aminobutyric Acid	Organic Acid And Its Derivatives	93975	87858	72426	179500	165550	182640	1.17706	2.0754	1.05339	up
MEDN304	Cinnamic Acid	Organic Acid And Its Derivatives	23343	17029	13993	42628	29989	39343	1.08307	2.05941	1.04223	up
MEDN400	Α-Linolenic Acid(C18:3N3)	Lipids_Fatty Acids	75291	56951	56247	130250	122090	132870	1.16802	2.04367	1.03116	up
MEDP676	Butyl 3-methylbutanoate	Fatty acyls	1621100	1902600	1565200	3914800	3250000	3187700	1.16802	2.03433	1.02455	up
Cmhp102	CAR C18:1-OH(3)	Carnitine	25134	18704	17576	43776	35591	45348	1.13529	2.03073	1.022	up
MEDN771	15-oxoETE [15-oxo-5Z,8Z,11Z,13E-eicosatetraenoic acid]	Oxidized lipid	319930	235580	243860	568630	480650	572290	1.15658	2.02856	1.02046	up
MEDP606	2-(3,4-dimethoxyphenyl)ethanamine	Amines	9677900	7703700	6641900	18177000	13321000	17100000	1.12013	2.02294	1.01645	up
MEDP316	Homovanillic Acid	Organic Acid And Its Derivatives	3090400	2362500	2139300	5934400	4176600	5161100	1.11317	2.01155	1.00831	up
MEDP519	L-Norleucine	Amino Acid metabolomics	584880	536610	581180	1242400	1074900	1095500	1.19594	2.00438	1.00316	up
MEDN506	N-Acetylglucosamine 1-Phosphate	Carbohydrate metabolomics	1269200	1139800	957450	2361100	2070000	2305600	1.16825	2.00113	1.00081	up
MEDN221	D-Mannose	Carbohydrate metabolomics	615220	522620	653090	294750	261460	298780	1.17603	0.4774	-1.06673	down
MEDP143	Biotin	CoOthersEnzyme Factor & vitamin	114250	82697	67446	36967	40172	46808	1.09846	0.468798	-1.09296	down
MEDP859	glycylphenylalanine	Amino Acid metabolomics	271080	300970	246460	164470	86327	103500	1.09907	0.432856	-1.20804	down
MEDN832	D-Glucosamine 6-Phosphate	Carbohydrate metabolomics	2407700	2078700	3237800	802040	1314900	1224300	1.08464	0.432568	-1.209	down
MEDN528	(3-Methoxy-4-hydroxyphenyl)ethylene glycol sulfate	Organic Acid And Its Derivatives	17631	16168	20699	7611.3	5798.4	5202.3	1.17135	0.341517	-1.54997	down
MEDN413	Ethylmalonate	Organic Acid And Its Derivatives	54583	50766	49047	19046	20889	12482	1.16398	0.339497	-1.55853	down
MEDN314	Glutaric Acid	Organic Acid And Its Derivatives	10424000	7940600	7861700	3017000	2683600	2972500	1.18727	0.330702	-1.59639	down
MEDN285	2-Methylsuccinic Acid	Organic Acid And Its Derivatives	9857500	7863500	7371300	2983100	2251300	2860900	1.17804	0.322621	-1.63209	down
MWS0965-N	24,25-Dihydrolanosterol	Lipids_others	8219.9	5049	3747.3	2477.3	1007.5	1899	1.03086	0.316393	-1.66021	down
MEDN537	ADP-ribose	Nucleotide metabolomics	6657200	6862300	5578800	1310100	1189500	1288900	1.20448	0.198368	-2.33375	down
Cmhp023	CAR C8:1	Carnitine	54111	58330	60967	9	9	9	1.20818	0.000155702	-12.6489	down
